# Supplementary material for: Perpetuating the homing endonuclease life cycle: identification of mutations that modulate and change I-TevI cleavage preference
Source: PubMed Central journal article supplement — Nucleic Acids Res. 2016 Jul 7;44(15):7350–9. doi: 10.1093/nar/gkw614 (PMC5009752; doi:10.1093/nar/gkw614), 2016-07-07
Supplement: supp_gkw614_nar-01491-h-2016-File008.pdf [file supp_gkw614_nar-01491-h-2016-File008.pdf]

**S1 Fig. The position of nicking sites of I-TevI T3 are unaffected by substitutions at position 1 of the cleavage motif.** pTox plasmids harbouring native cleavage motif (C1C [C, D]), or one of three position 1 substitutions (C1A [A, B], C1G [E, F], C1T [G, H]) were sequenced using flanking primers: one upstream of the cleavage motif (forward. [A, C, E, G]) and one downstream (reverse. [B, D, F, H], the reverse complement is shown). Sanger sequencing readouts are shown with traces for adenine (green), cytosine (blue), guanine (black), and thymine (red). The cleavage motif is given above the corresponding region of the readout, with a chevron indicating the predicted nicking position. A drop-off in fluorescence intensity is seen in each sanger readout corresponding to the predicted nicking positions in all eight cases. The 3' A or 5' T observed in each trace is an artifact of sequencing.

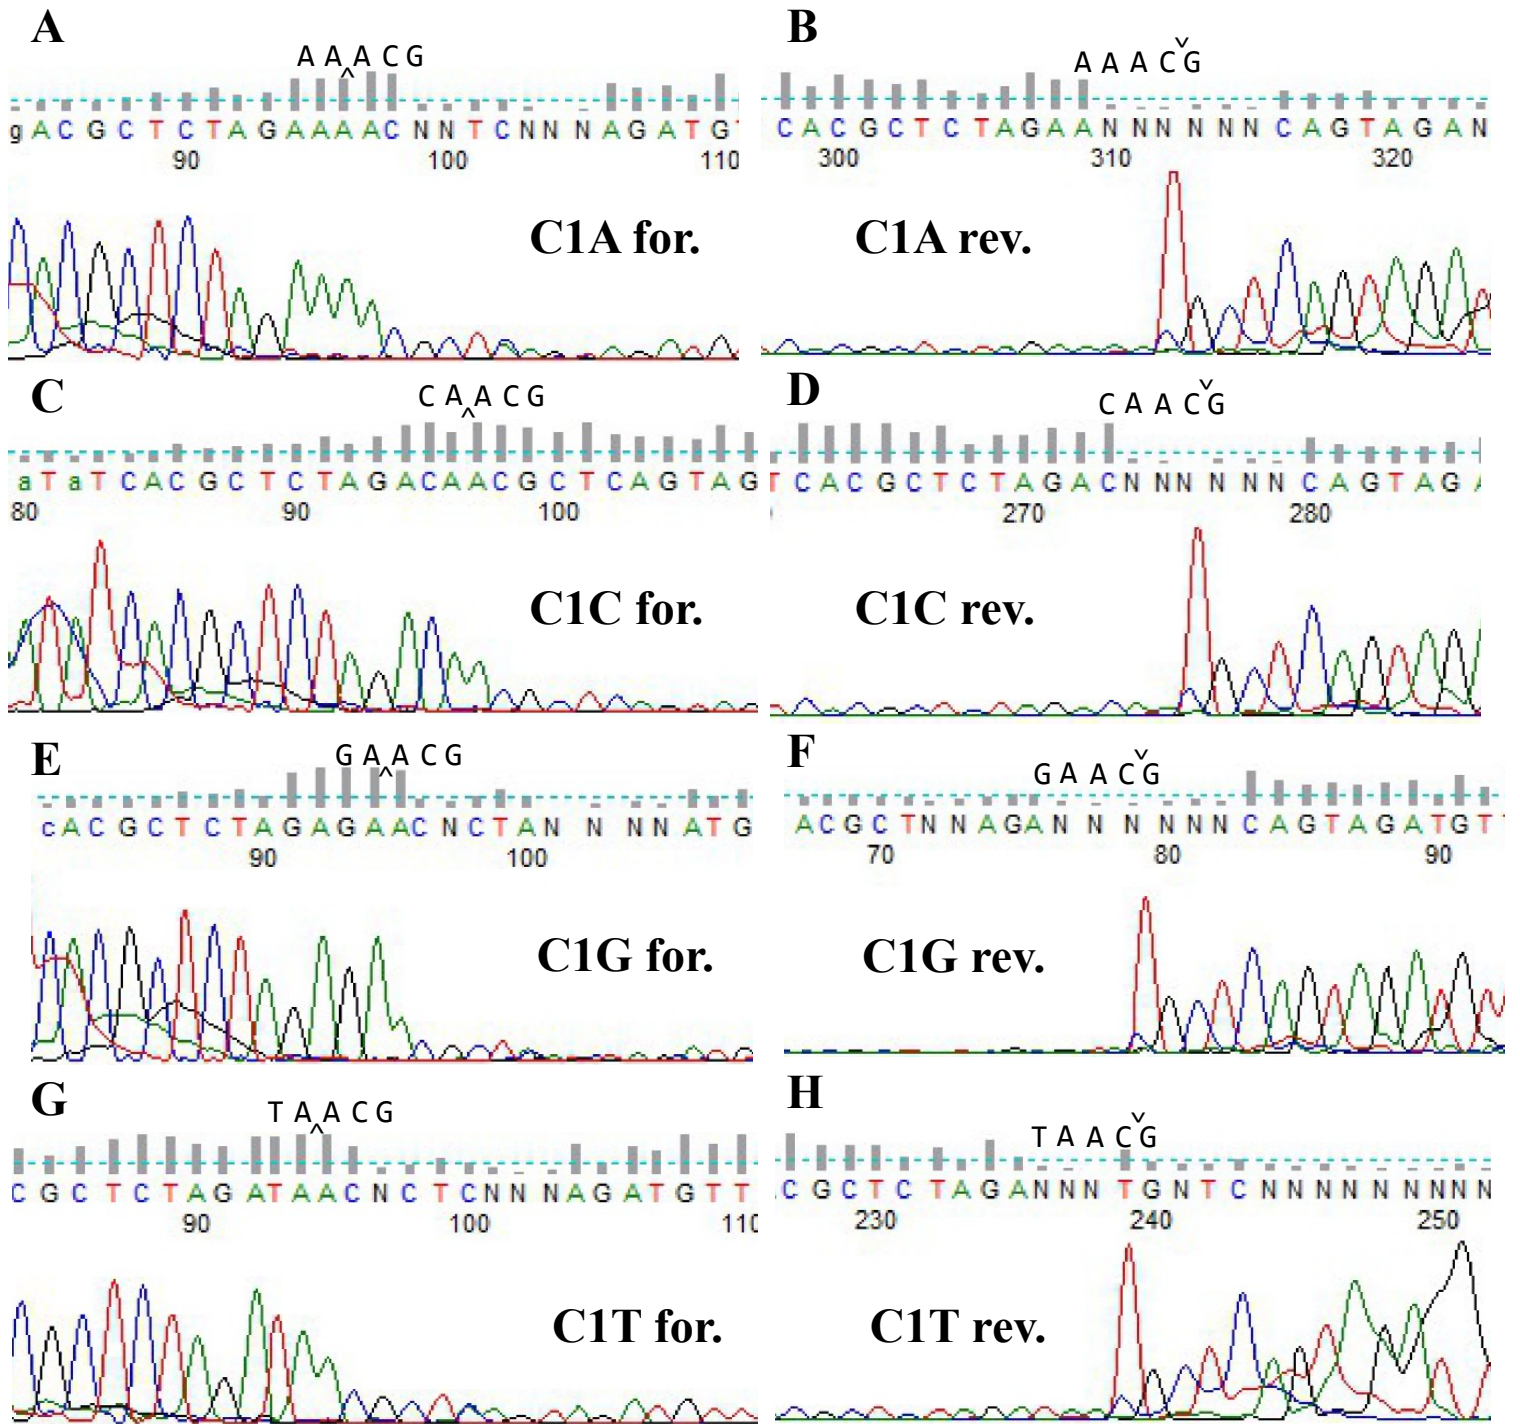

**S2 Fig. Gel images of time course barcode cleavage assays for MegaTev variants.** Each gel image corresponds to a position within the CAACG motif, or a related set of “triplet” substrates. The nucleotide substitution for each length substrate (S) is indicated on the left side of the gel in black font. The corresponding product (P) is indicated in red font. The images for each substrate were cropped from separate images and assembled into a composite figure.

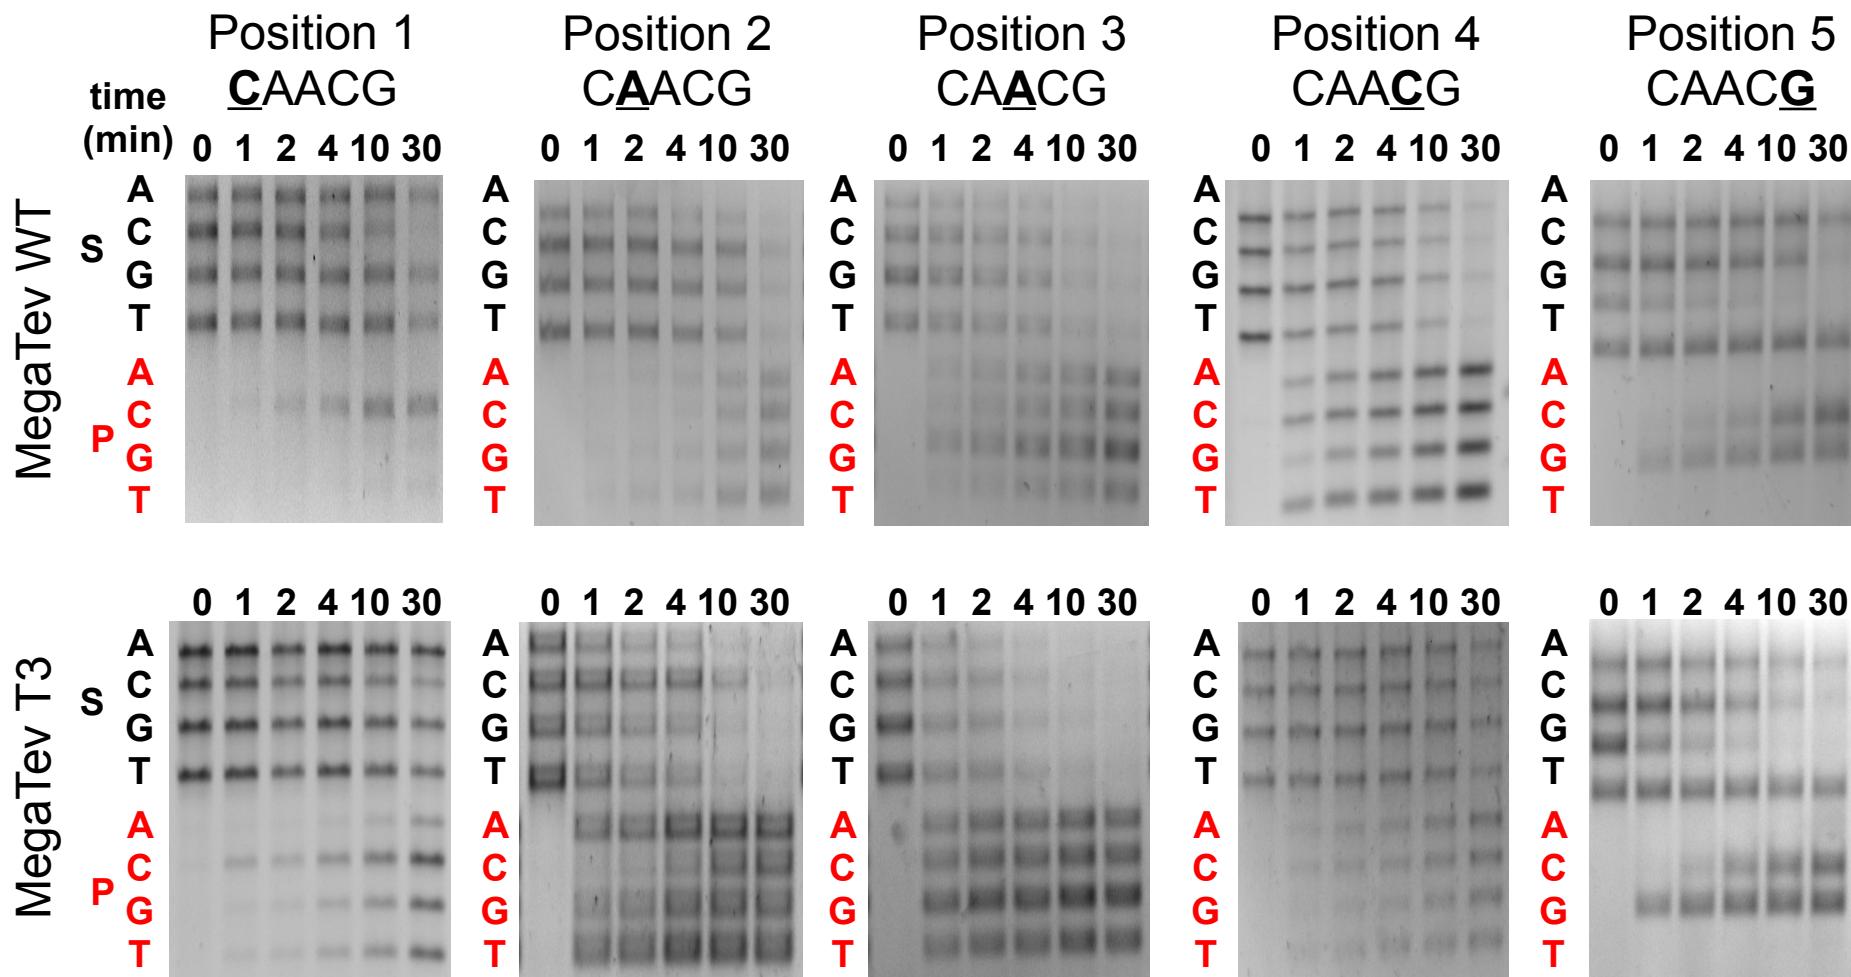



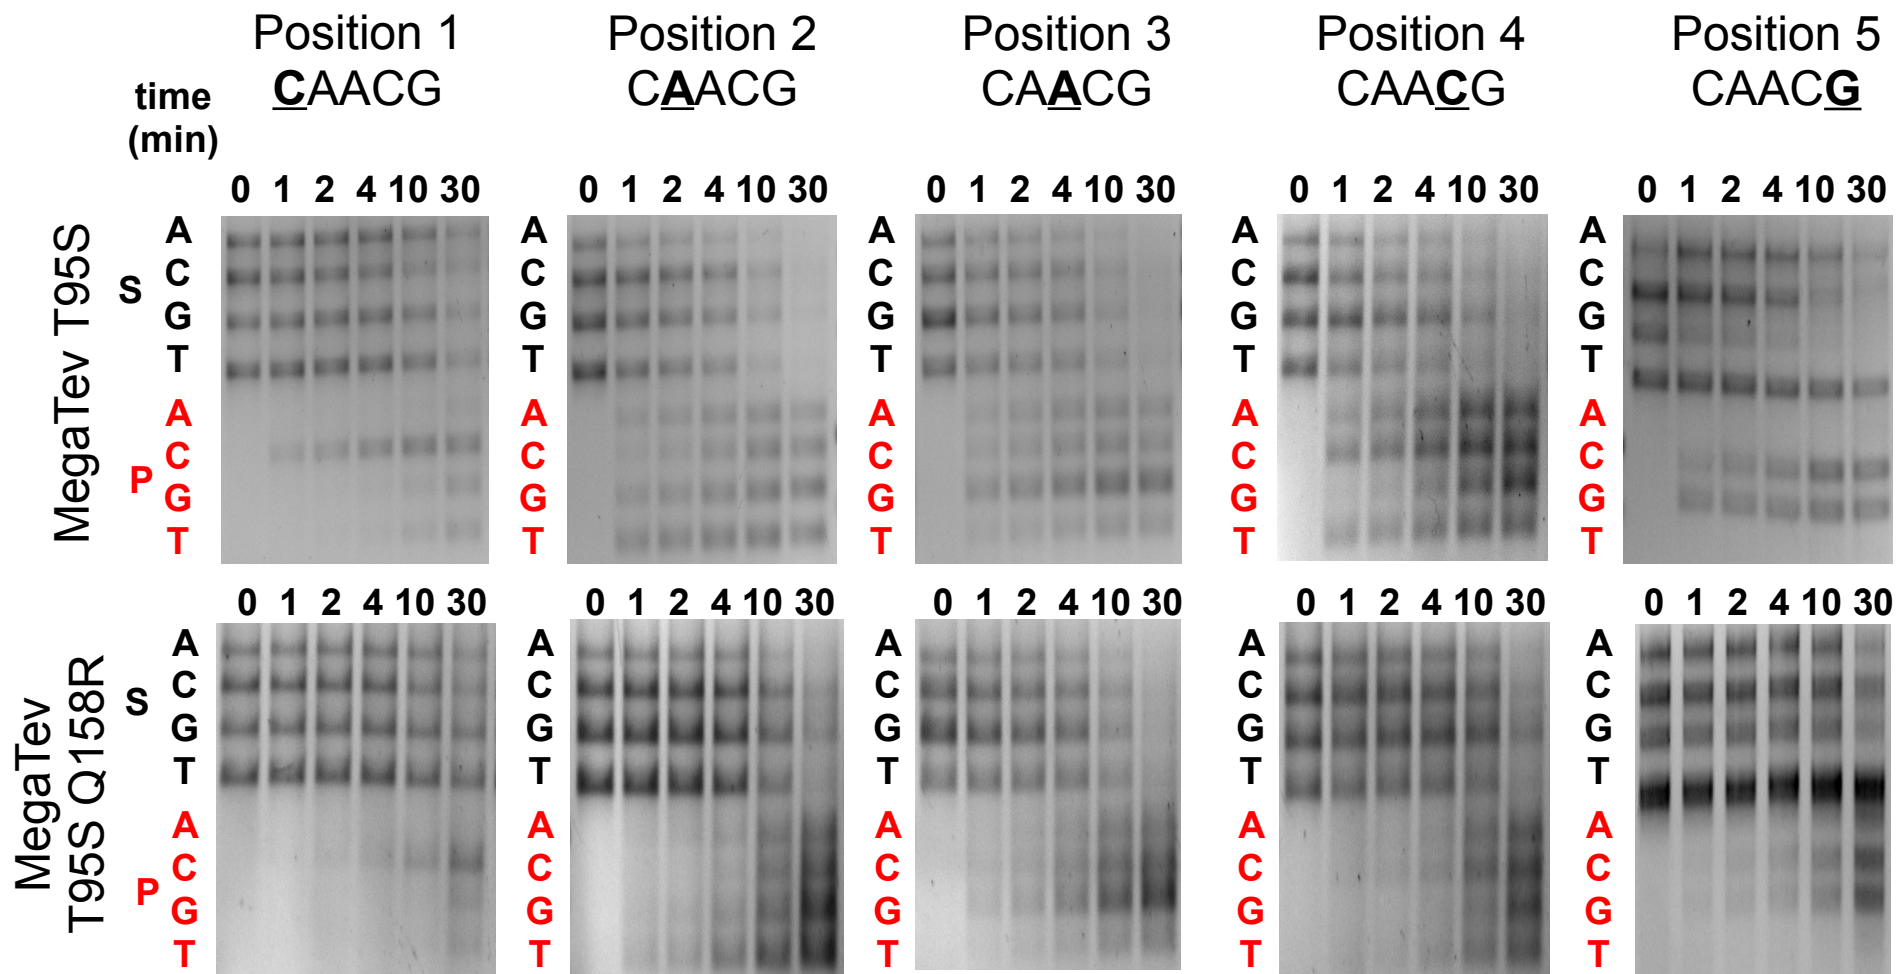

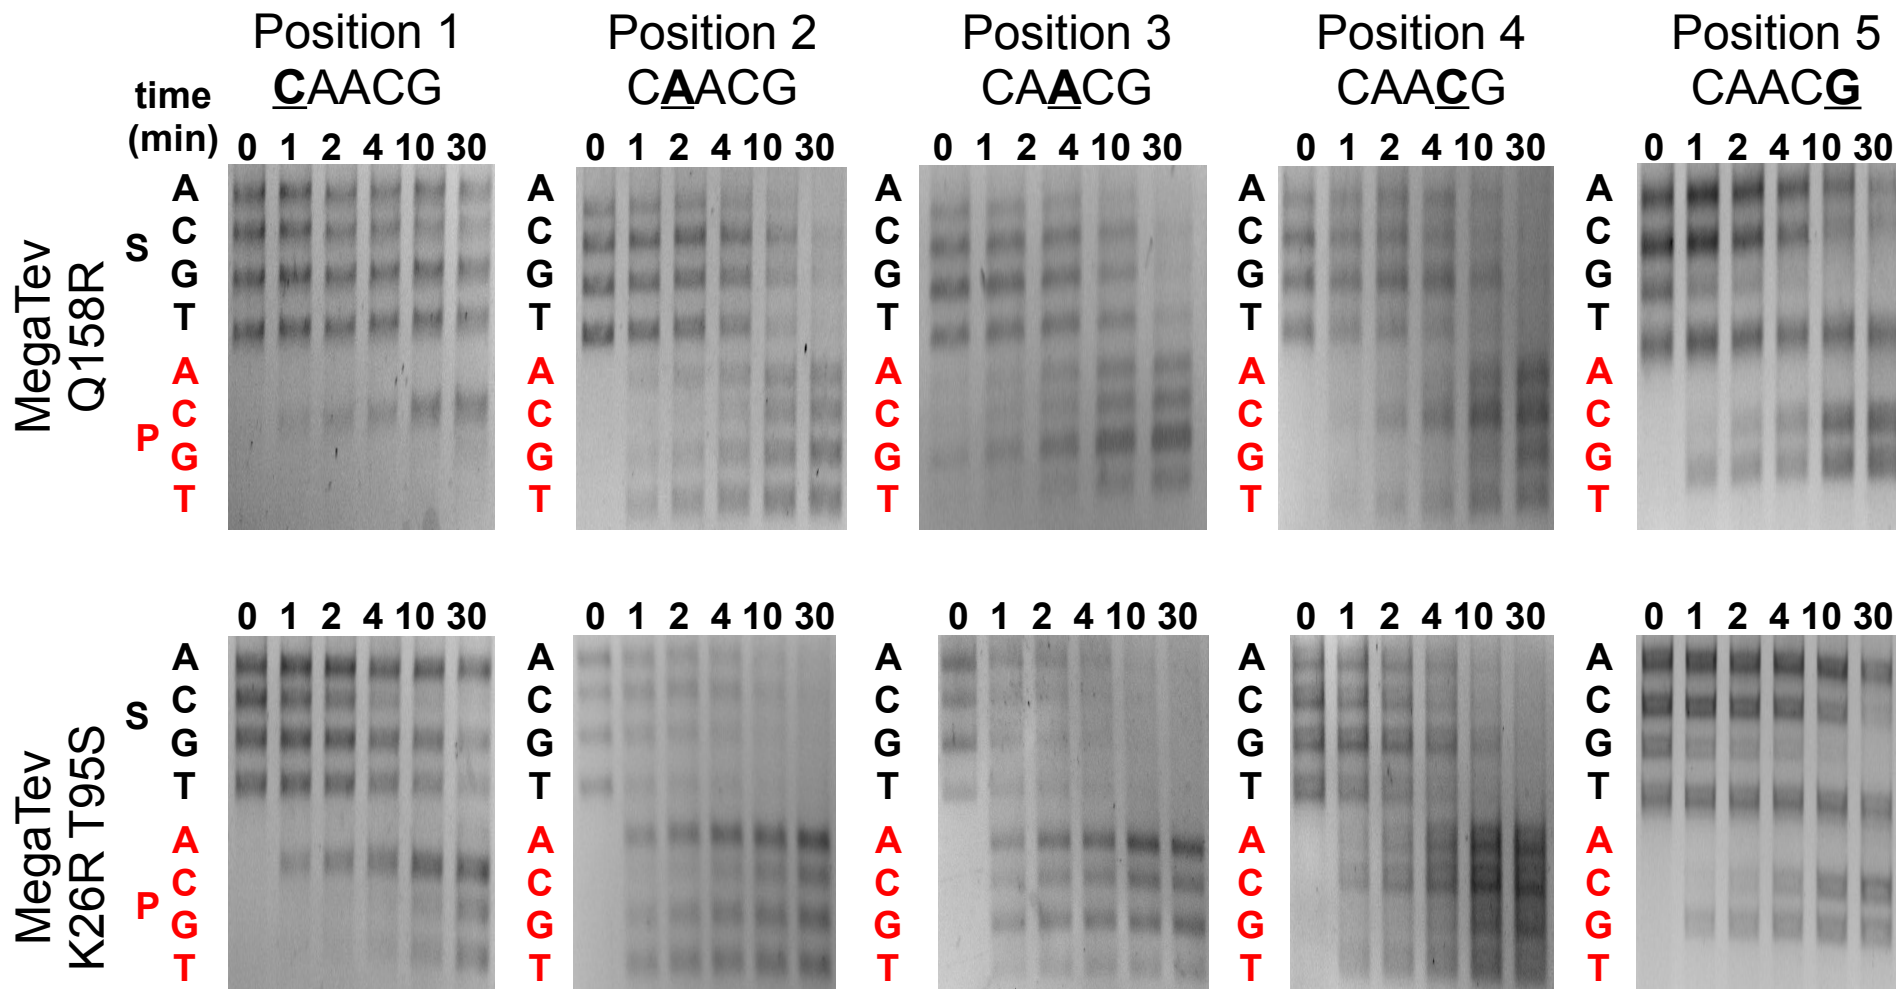



MegaTev WT

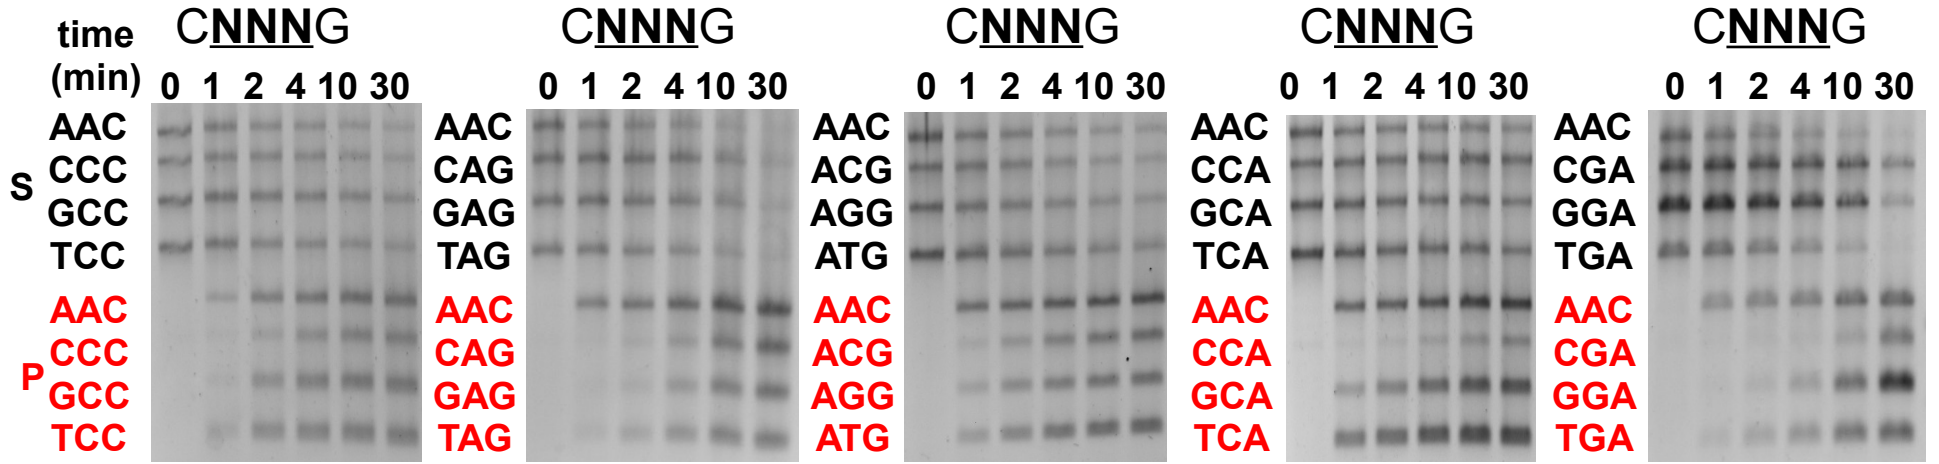

MegaTev T3

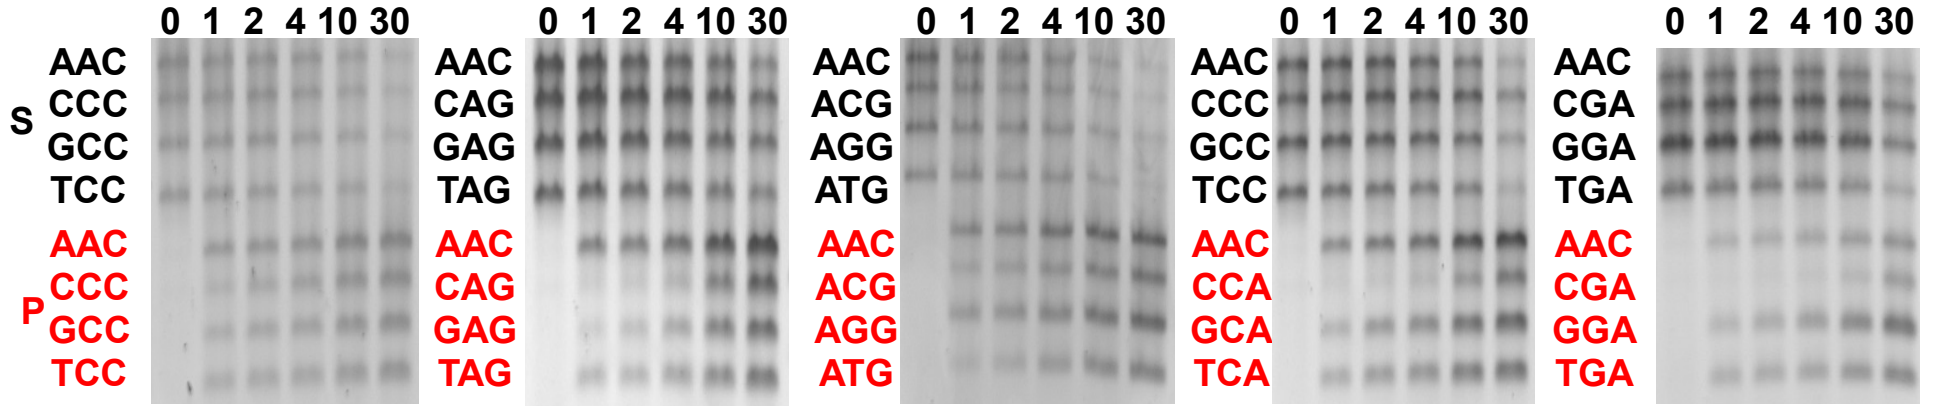

MegaTev WT

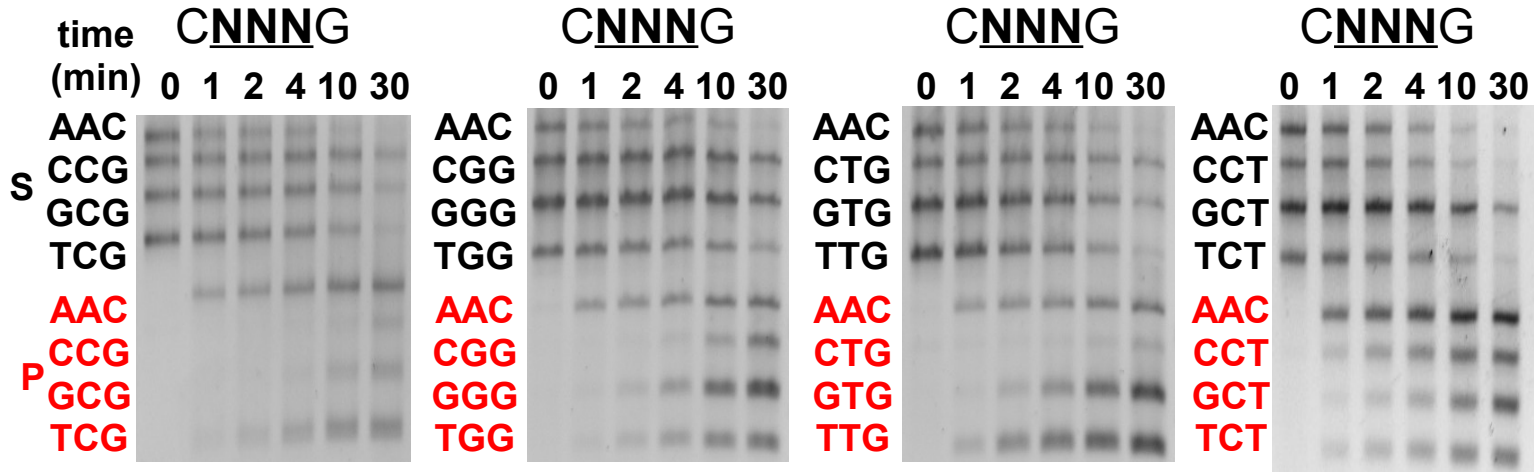

MegaTev T3

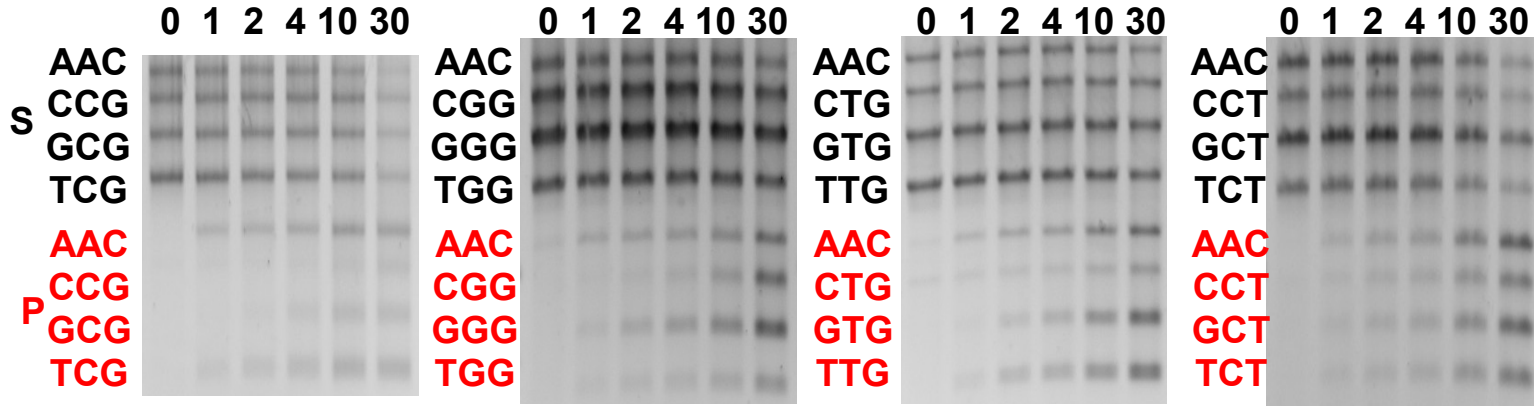

**S3 Fig. Barcode assay kinetic data.** MegaTev variants were assayed against four substrates of varying lengths (2200 [yellow ▲], 1900 [blue ▲], 1600 [green ▲], and 1320 bp [red ▲]). Each plot represents reaction progress over time for a combination of substrates and MegaTev enzyme. Substrates harboured I-TevI cleavage motifs, one of which was the native cleavage motif (5' – CAACG – 3'), and the others were comprised of NNN triplet substitutions (5' – CNNNG – 3'), position 1 substitutions (5' – NAACG – 3'), or control substrates (as described in the text). The controls included all native cleavage motifs, one of each of four lengths, or a single native cleavage motif among cleavage resistant motifs (5' – AAACA – 3'). The equation of fit is explained in detail in the text (see Equation 1). Note that the equation given below is superficially different; using the identities  $y = f_s$ , and  $x = t$ , the equations below become Equation 1.



# MegaTev-wt pos1

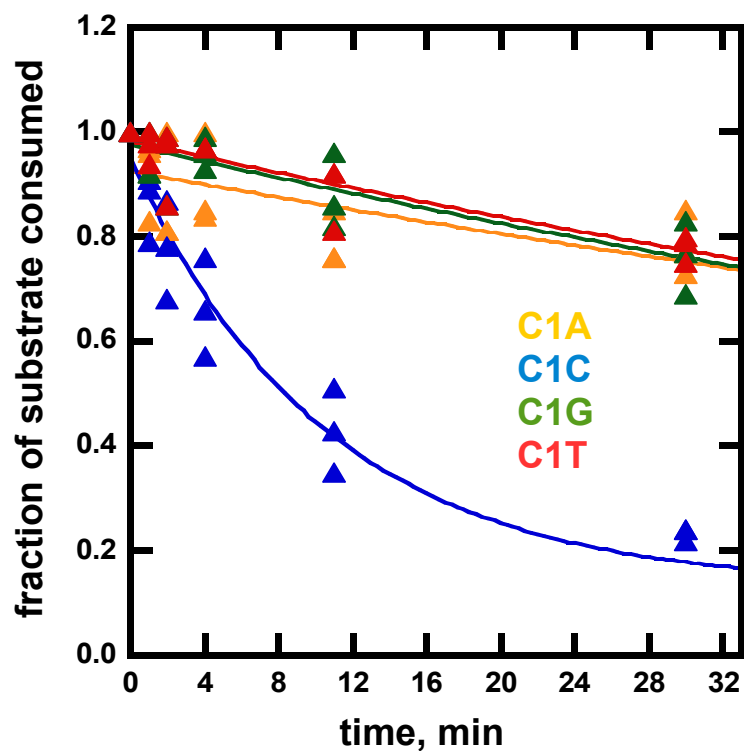

$$y = m1 + m2 \cdot \exp(-m3 \cdot x)$$

|                | Value      | Error     |
|----------------|------------|-----------|
| m1             | 0.00027691 | 0.081058  |
| m2             | 0.92428    | 0.084159  |
| m3             | 0.0068968  | 0.0024033 |
| Chisq          | 0.10323    | NA        |
| R <sup>2</sup> | 0.88471    | NA        |

$$y = m1 + m2 \cdot \exp(-m3 \cdot x)$$

|                | Value    | Error    |
|----------------|----------|----------|
| m1             | 0.13191  | 0.052163 |
| m2             | 0.81883  | 0.054531 |
| m3             | 0.095529 | 0.018596 |
| Chisq          | 0.09732  | NA       |
| R <sup>2</sup> | 0.94235  | NA       |

$$y = m1 + m2 \cdot \exp(-m3 \cdot x)$$

|                | Value      | Error     |
|----------------|------------|-----------|
| m1             | -5.4426e-5 | 0.051252  |
| m2             | 0.97499    | 0.053392  |
| m3             | 0.0083109  | 0.0015143 |
| Chisq          | 0.041817   | NA        |
| R <sup>2</sup> | 0.95536    | NA        |

$$y = m1 + m2 \cdot \exp(-m3 \cdot x)$$

|                | Value      | Error     |
|----------------|------------|-----------|
| m1             | -5.2976e-5 | 0.040737  |
| m2             | 0.98257    | 0.04242   |
| m3             | 0.0079598  | 0.0011796 |
| Chisq          | 0.026368   | NA        |
| R <sup>2</sup> | 0.9717     | NA        |

# MegaTev-wt pos2

211

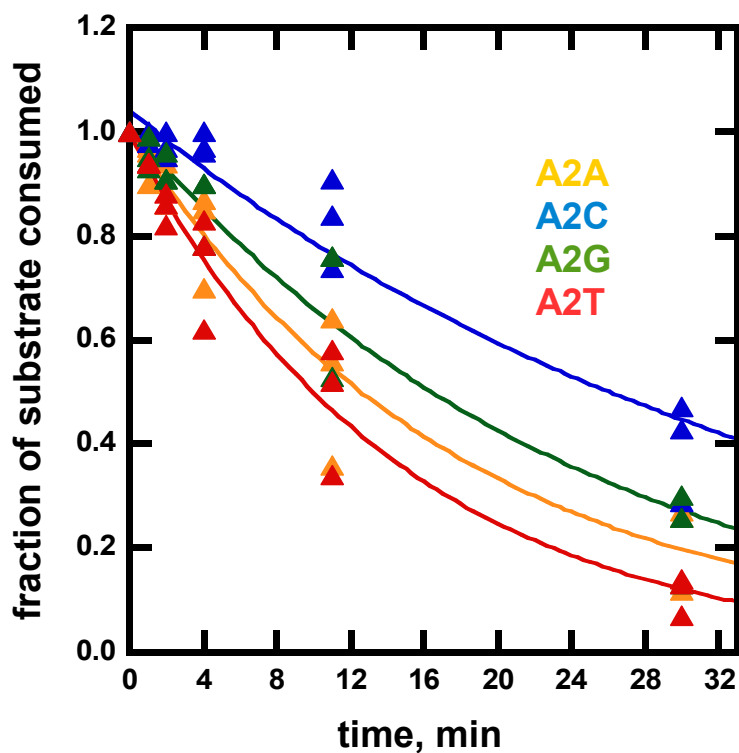

| y = m1 + m2*exp(-m3*x) |          |           |
|------------------------|----------|-----------|
|                        | Value    | Error     |
| m1                     | 0.020717 | 0.064804  |
| m2                     | 0.98356  | 0.06443   |
| m3                     | 0.057261 | 0.0095278 |
| Chisq                  | 0.085323 | NA        |
| R <sup>2</sup>         | 0.95714  | NA        |

| y = m1 + m2*exp(-m3*x) |           |           |
|------------------------|-----------|-----------|
|                        | Value     | Error     |
| m1                     | -0.021742 | 0.064941  |
| m2                     | 1.061     | 0.066745  |
| m3                     | 0.027244  | 0.0035897 |
| Chisq                  | 0.068489  | NA        |
| R <sup>2</sup>         | 0.95646   | NA        |

| y = m1 + m2*exp(-m3*x) |           |           |
|------------------------|-----------|-----------|
|                        | Value     | Error     |
| m1                     | -0.032002 | 0.067897  |
| m2                     | 1.0436    | 0.068519  |
| m3                     | 0.041123  | 0.0060596 |
| Chisq                  | 0.079497  | NA        |
| R <sup>2</sup>         | 0.958     | NA        |

| y = m1 + m2*exp(-m3*x) |            |           |
|------------------------|------------|-----------|
|                        | Value      | Error     |
| m1                     | -0.0074564 | 0.051061  |
| m2                     | 1.0029     | 0.050855  |
| m3                     | 0.06849    | 0.0094489 |
| Chisq                  | 0.062342   | NA        |
| R <sup>2</sup>         | 0.9717     | NA        |

# MegaTev-wt pos3

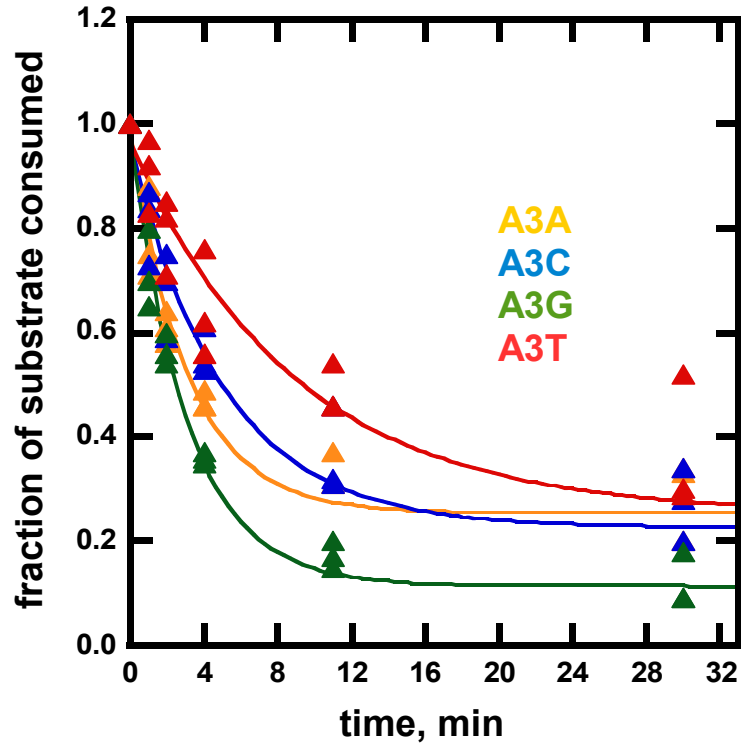

$$y = m1 + m2 \cdot \exp(-m3 \cdot x)$$

|                | Value   | Error    |
|----------------|---------|----------|
| m1             | 0.25416 | 0.034701 |
| m2             | 0.73301 | 0.053155 |
| m3             | 0.32299 | 0.057994 |
| Chisq          | 0.11387 | NA       |
| R <sup>2</sup> | 0.92303 | NA       |

$$y = m1 + m2 \cdot \exp(-m3 \cdot x)$$

|                | Value   | Error    |
|----------------|---------|----------|
| m1             | 0.22681 | 0.042542 |
| m2             | 0.73696 | 0.055635 |
| m3             | 0.19882 | 0.041447 |
| Chisq          | 0.12825 | NA       |
| R <sup>2</sup> | 0.91645 | NA       |

$$y = m1 + m2 \cdot \exp(-m3 \cdot x)$$

|                | Value    | Error    |
|----------------|----------|----------|
| m1             | 0.11418  | 0.020585 |
| m2             | 0.86968  | 0.031591 |
| m3             | 0.32499  | 0.029186 |
| Chisq          | 0.040198 | NA       |
| R <sup>2</sup> | 0.97951  | NA       |

$$y = m1 + m2 \cdot \exp(-m3 \cdot x)$$

|                | Value   | Error    |
|----------------|---------|----------|
| m1             | 0.25285 | 0.065892 |
| m2             | 0.71295 | 0.07214  |
| m3             | 0.11299 | 0.033475 |
| Chisq          | 0.18991 | NA       |
| R <sup>2</sup> | 0.86821 | NA       |

# MegaTev-wt pos4

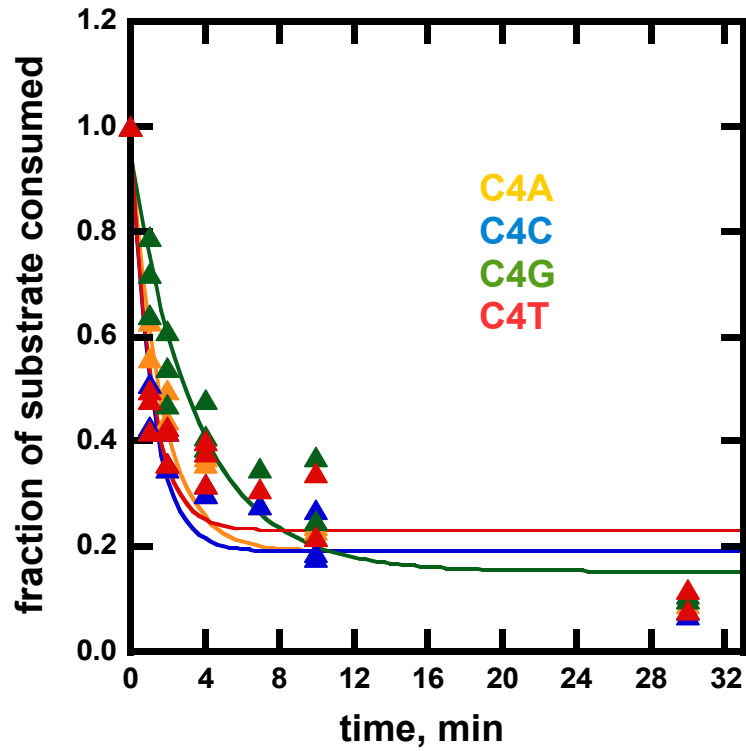

$$y = m1 + m2 \cdot \exp(-m3 \cdot x)$$

|                | Value   | Error    |
|----------------|---------|----------|
| m1             | 0.19034 | 0.034929 |
| m2             | 0.78129 | 0.061262 |
| m3             | 0.61458 | 0.11232  |
| Chisq          | 0.14368 | NA       |
| R <sup>2</sup> | 0.91069 | NA       |

$$y = m1 + m2 \cdot \exp(-m3 \cdot x)$$

|                | Value   | Error    |
|----------------|---------|----------|
| m1             | 0.19078 | 0.030804 |
| m2             | 0.79212 | 0.059087 |
| m3             | 0.87436 | 0.1546   |
| Chisq          | 0.13225 | NA       |
| R <sup>2</sup> | 0.9183  | NA       |

$$y = m1 + m2 \cdot \exp(-m3 \cdot x)$$

|                | Value   | Error    |
|----------------|---------|----------|
| m1             | 0.15292 | 0.041832 |
| m2             | 0.79656 | 0.055731 |
| m3             | 0.28242 | 0.050818 |
| Chisq          | 0.1204  | NA       |
| R <sup>2</sup> | 0.92764 | NA       |

$$y = m1 + m2 \cdot \exp(-m3 \cdot x)$$

|                | Value   | Error    |
|----------------|---------|----------|
| m1             | 0.23094 | 0.03561  |
| m2             | 0.75136 | 0.068694 |
| m3             | 0.89702 | 0.19515  |
| Chisq          | 0.17869 | NA       |
| R <sup>2</sup> | 0.88208 | NA       |

# MegaTev-wt pos5

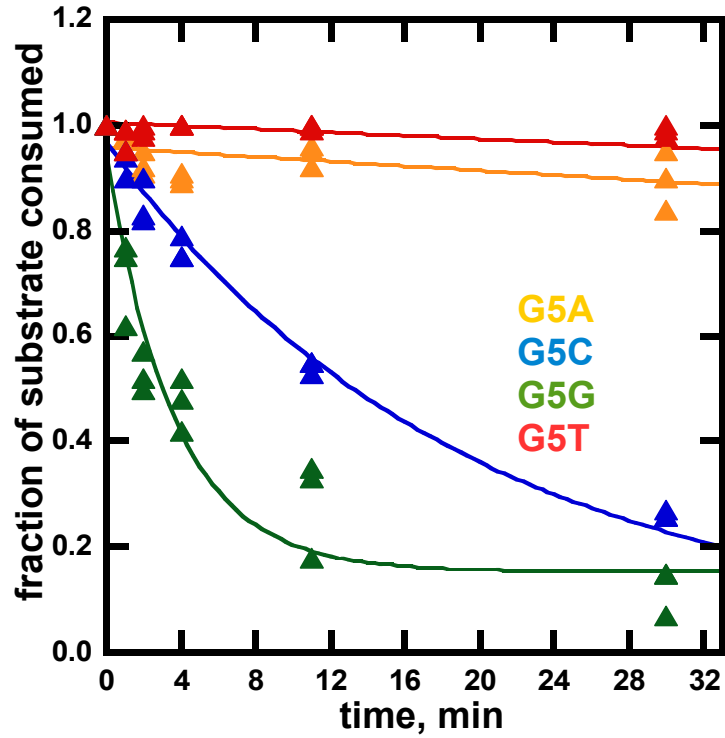

$$y = m1 + m2 \cdot \exp(-m3 \cdot x)$$

|                | Value     | Error     |
|----------------|-----------|-----------|
| m1             | -0.14508  | 0.21467   |
| m2             | 1.1026    | 0.20828   |
| m3             | 0.0020278 | 0.0012351 |
| Chisq          | 0.024798  | NA        |
| R <sup>2</sup> | 0.97153   | NA        |

$$y = m1 + m2 \cdot \exp(-m3 \cdot x)$$

|                | Value    | Error     |
|----------------|----------|-----------|
| m1             | 0.040771 | 0.032027  |
| m2             | 0.92592  | 0.031917  |
| m3             | 0.052988 | 0.0044958 |
| Chisq          | 0.019759 | NA        |
| R <sup>2</sup> | 0.988    | NA        |

$$y = m1 + m2 \cdot \exp(-m3 \cdot x)$$

|                | Value   | Error    |
|----------------|---------|----------|
| m1             | 0.15434 | 0.040028 |
| m2             | 0.79079 | 0.058246 |
| m3             | 0.27512 | 0.052268 |
| Chisq          | 0.13873 | NA       |
| R <sup>2</sup> | 0.92051 | NA       |

$$y = m1 + m2 \cdot \exp(-m3 \cdot x)$$

|                | Value     | Error     |
|----------------|-----------|-----------|
| m1             | -0.31227  | 0.62245   |
| m2             | 1.3174    | 0.61725   |
| m3             | 0.0012055 | 0.0011009 |
| Chisq          | 0.014235  | NA        |
| R <sup>2</sup> | 0.98478   | NA        |

# MegaTev-T3 pos1

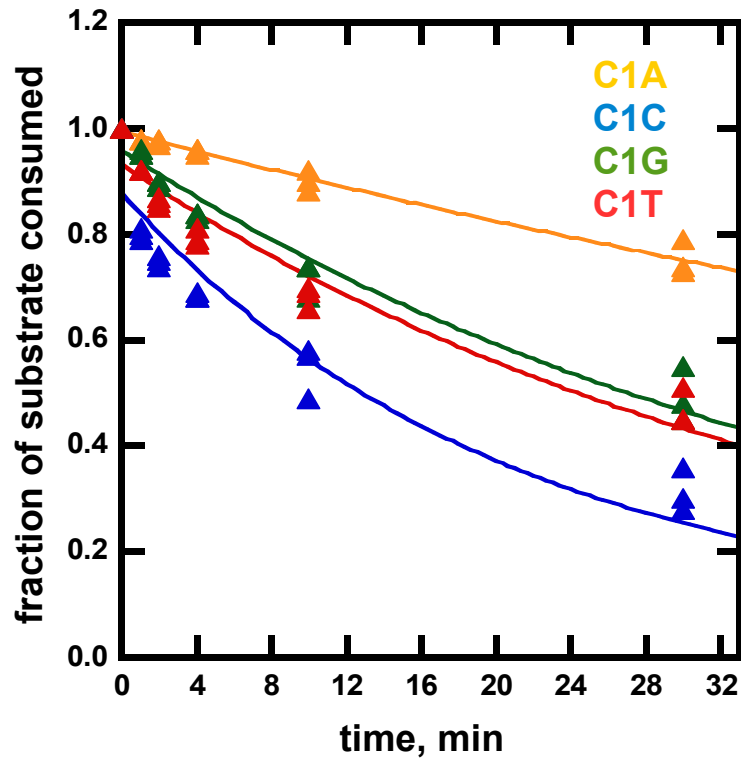

$$y = m1 + m2 \cdot \exp(-m3 \cdot x)$$

|                | Value     | Error      |
|----------------|-----------|------------|
| m1             | 6.4186e-5 | 0.014334   |
| m2             | 0.99352   | 0.014932   |
| m3             | 0.0093258 | 0.00043412 |
| Chisq          | 0.003281  | NA         |
| R <sup>2</sup> | 0.99653   | NA         |

$$y = m1 + m2 \cdot \exp(-m3 \cdot x)$$

|                | Value    | Error    |
|----------------|----------|----------|
| m1             | 0.067904 | 0.069893 |
| m2             | 0.80943  | 0.069723 |
| m3             | 0.048876 | 0.0102   |
| Chisq          | 0.089982 | NA       |
| R <sup>2</sup> | 0.92923  | NA       |

$$y = m1 + m2 \cdot \exp(-m3 \cdot x)$$

|                | Value    | Error     |
|----------------|----------|-----------|
| m1             | 0.010732 | 0.038395  |
| m2             | 0.94772  | 0.039551  |
| m3             | 0.02444  | 0.0021671 |
| Chisq          | 0.023805 | NA        |
| R <sup>2</sup> | 0.97945  | NA        |

$$y = m1 + m2 \cdot \exp(-m3 \cdot x)$$

|                | Value    | Error     |
|----------------|----------|-----------|
| m1             | 0.016272 | 0.046755  |
| m2             | 0.91579  | 0.048062  |
| m3             | 0.0262   | 0.0029144 |
| Chisq          | 0.035407 | NA        |
| R <sup>2</sup> | 0.96869  | NA        |



# MegaTev-T3 pos2

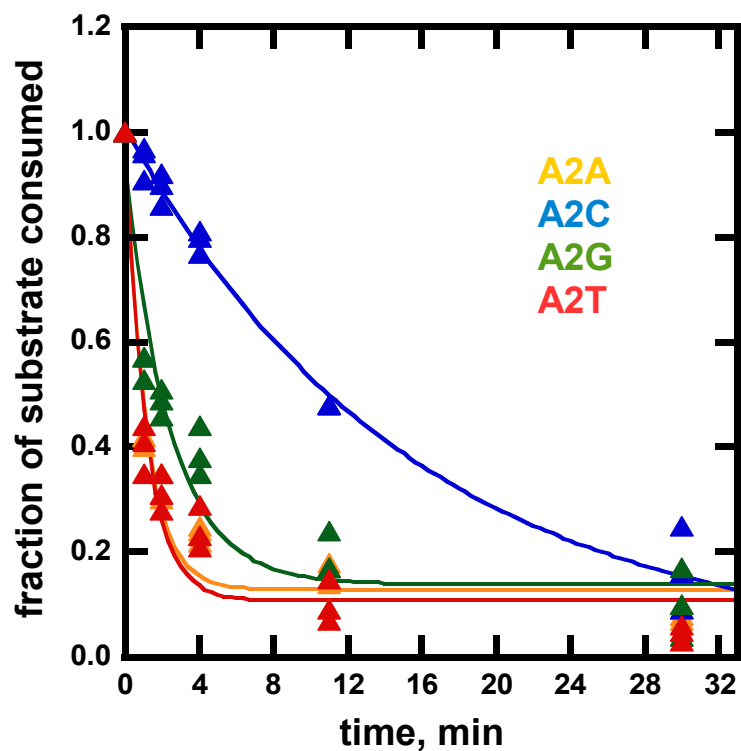

| y = m1 + m2*exp(-m3*x) |          |          |
|------------------------|----------|----------|
|                        | Value    | Error    |
| m1                     | 0.12934  | 0.023292 |
| m2                     | 0.85358  | 0.044921 |
| m3                     | 0.87859  | 0.10924  |
| Chisq                  | 0.076452 | NA       |
| R <sup>2</sup>         | 0.9576   | NA       |

| y = m1 + m2*exp(-m3*x) |          |           |
|------------------------|----------|-----------|
|                        | Value    | Error     |
| m1                     | 0.013363 | 0.029881  |
| m2                     | 0.99525  | 0.029707  |
| m3                     | 0.065148 | 0.0051962 |
| Chisq                  | 0.020289 | NA        |
| R <sup>2</sup>         | 0.99027  | NA        |

| y = m1 + m2*exp(-m3*x) |         |          |
|------------------------|---------|----------|
|                        | Value   | Error    |
| m1                     | 0.13886 | 0.034328 |
| m2                     | 0.8025  | 0.056289 |
| m3                     | 0.41126 | 0.067869 |
| Chisq                  | 0.12486 | NA       |
| R <sup>2</sup>         | 0.92777 | NA       |

| y = m1 + m2*exp(-m3*x) |          |          |
|------------------------|----------|----------|
|                        | Value    | Error    |
| m1                     | 0.10847  | 0.026417 |
| m2                     | 0.87251  | 0.050826 |
| m3                     | 0.86804  | 0.11923  |
| Chisq                  | 0.097894 | NA       |
| R <sup>2</sup>         | 0.94855  | NA       |

# MegaTev-T3 pos3

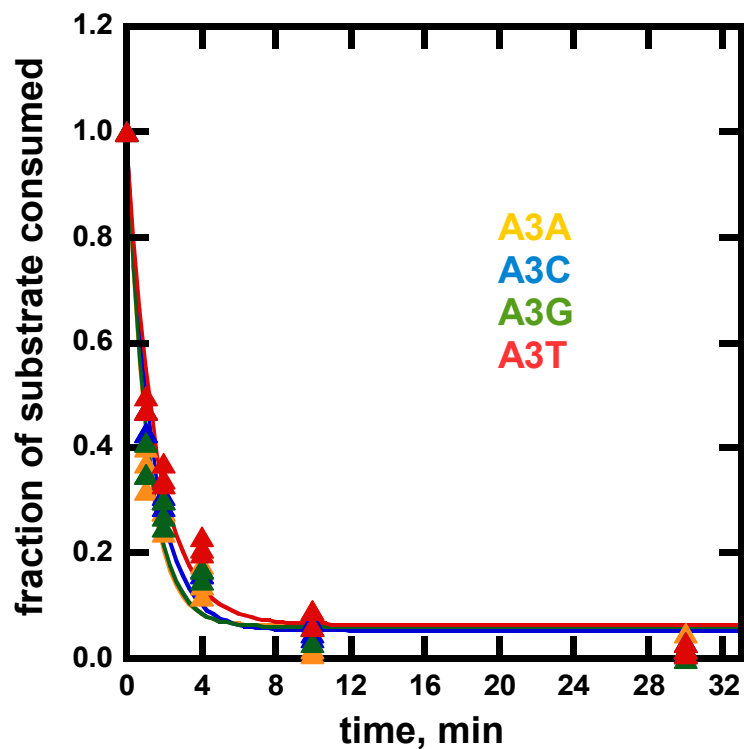

$$y = m1 + m2 \cdot \exp(-m3 \cdot x)$$

|                | Value    | Error    |
|----------------|----------|----------|
| m1             | 0.062893 | 0.01928  |
| m2             | 0.92328  | 0.037609 |
| m3             | 0.93281  | 0.090812 |
| Chisq          | 0.05355  | NA       |
| R <sup>2</sup> | 0.97415  | NA       |

$$y = m1 + m2 \cdot \exp(-m3 \cdot x)$$

|                | Value    | Error    |
|----------------|----------|----------|
| m1             | 0.053289 | 0.01581  |
| m2             | 0.92973  | 0.029327 |
| m3             | 0.73181  | 0.053423 |
| Chisq          | 0.032728 | NA       |
| R <sup>2</sup> | 0.98437  | NA       |

$$y = m1 + m2 \cdot \exp(-m3 \cdot x)$$

|                | Value    | Error    |
|----------------|----------|----------|
| m1             | 0.060967 | 0.020422 |
| m2             | 0.92293  | 0.039502 |
| m3             | 0.8943   | 0.090758 |
| Chisq          | 0.059104 | NA       |
| R <sup>2</sup> | 0.97154  | NA       |

$$y = m1 + m2 \cdot \exp(-m3 \cdot x)$$

|                | Value    | Error    |
|----------------|----------|----------|
| m1             | 0.064563 | 0.01986  |
| m2             | 0.91048  | 0.035623 |
| m3             | 0.62808  | 0.056516 |
| Chisq          | 0.048584 | NA       |
| R <sup>2</sup> | 0.97621  | NA       |

# MegaTev-T3 pos4

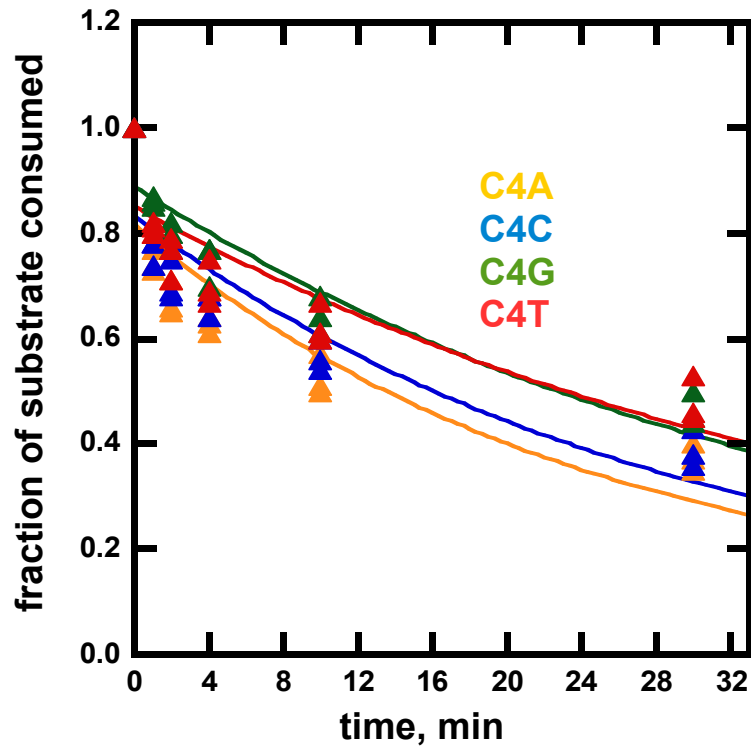

$$y = m1 + m2 \cdot \exp(-m3 \cdot x)$$

|                | Value    | Error    |
|----------------|----------|----------|
| m1             | 0.07577  | 0.10316  |
| m2             | 0.74065  | 0.10387  |
| m3             | 0.041234 | 0.013189 |
| Chisq          | 0.18353  | NA       |
| R <sup>2</sup> | 0.83169  | NA       |

$$y = m1 + m2 \cdot \exp(-m3 \cdot x)$$

|                | Value    | Error    |
|----------------|----------|----------|
| m1             | 0.043316 | 0.09368  |
| m2             | 0.78877  | 0.095292 |
| m3             | 0.034003 | 0.008919 |
| Chisq          | 0.14544  | NA       |
| R <sup>2</sup> | 0.86461  | NA       |

$$y = m1 + m2 \cdot \exp(-m3 \cdot x)$$

|                | Value    | Error     |
|----------------|----------|-----------|
| m1             | 0.021023 | 0.068464  |
| m2             | 0.86658  | 0.070383  |
| m3             | 0.02613  | 0.0044984 |
| Chisq          | 0.075911 | NA        |
| R <sup>2</sup> | 0.92808  | NA        |

$$y = m1 + m2 \cdot \exp(-m3 \cdot x)$$

|                | Value    | Error     |
|----------------|----------|-----------|
| m1             | 0.020292 | 0.087175  |
| m2             | 0.82963  | 0.089878  |
| m3             | 0.02368  | 0.0054637 |
| Chisq          | 0.12258  | NA        |
| R <sup>2</sup> | 0.87487  | NA        |

# MegaTev-T3 pos5

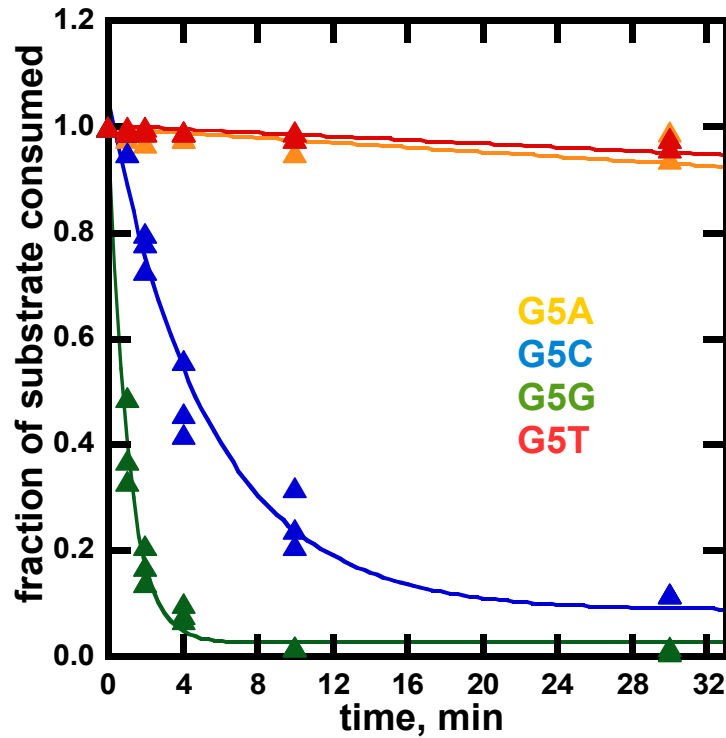

$$y = m1 + m2 \cdot \exp(-m3 \cdot x)$$

|                | Value     | Error      |
|----------------|-----------|------------|
| m1             | -0.04104  | 0.11348    |
| m2             | 1.0388    | 0.10939    |
| m3             | 0.0022215 | 0.00084633 |
| Chisq          | 0.011265  | NA         |
| R <sup>2</sup> | 0.98771   | NA         |

$$y = m1 + m2 \cdot \exp(-m3 \cdot x)$$

|                | Value    | Error    |
|----------------|----------|----------|
| m1             | 0.087667 | 0.034273 |
| m2             | 0.96671  | 0.04373  |
| m3             | 0.18621  | 0.022678 |
| Chisq          | 0.077213 | NA       |
| R <sup>2</sup> | 0.96839  | NA       |

$$y = m1 + m2 \cdot \exp(-m3 \cdot x)$$

|                | Value    | Error    |
|----------------|----------|----------|
| m1             | 0.026527 | 0.01233  |
| m2             | 0.97115  | 0.024107 |
| m3             | 0.94357  | 0.05611  |
| Chisq          | 0.021999 | NA       |
| R <sup>2</sup> | 0.99024  | NA       |

$$y = m1 + m2 \cdot \exp(-m3 \cdot x)$$

|                | Value     | Error      |
|----------------|-----------|------------|
| m1             | -0.25872  | 0.26558    |
| m2             | 1.262     | 0.26249    |
| m3             | 0.0013947 | 0.00063384 |
| Chisq          | 0.0052941 | NA         |
| R <sup>2</sup> | 0.9943    | NA         |

# MegaTev T95S pos1

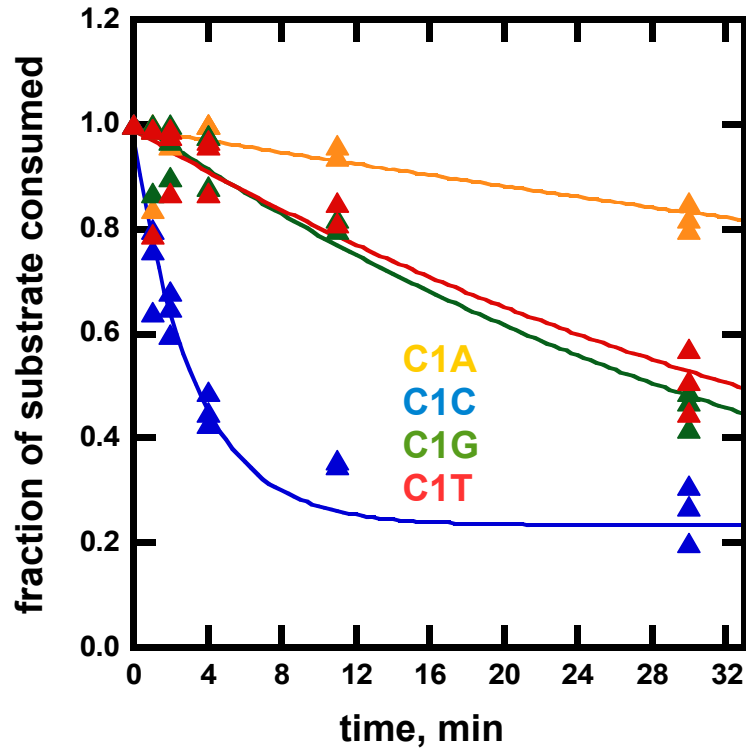

| y = m1 + m2*exp(-m3*x) |           |           |
|------------------------|-----------|-----------|
|                        | Value     | Error     |
| m1                     | -0.003106 | 0.044054  |
| m2                     | 0.99526   | 0.045408  |
| m3                     | 0.0058548 | 0.0011729 |
| Chisq                  | 0.027741  | NA        |
| R <sup>2</sup>         | 0.97034   | NA        |

| y = m1 + m2*exp(-m3*x) |         |          |
|------------------------|---------|----------|
|                        | Value   | Error    |
| m1                     | 0.23449 | 0.037392 |
| m2                     | 0.73761 | 0.055064 |
| m3                     | 0.30253 | 0.055294 |
| Chisq                  | 0.10873 | NA       |
| R <sup>2</sup>         | 0.92322 | NA       |

| y = m1 + m2*exp(-m3*x) |            |           |
|------------------------|------------|-----------|
|                        | Value      | Error     |
| m1                     | -0.0079427 | 0.048921  |
| m2                     | 1.0159     | 0.050505  |
| m3                     | 0.024333   | 0.0025807 |
| Chisq                  | 0.036173   | NA        |
| R <sup>2</sup>         | 0.97299    | NA        |

| y = m1 + m2*exp(-m3*x) |          |           |
|------------------------|----------|-----------|
|                        | Value    | Error     |
| m1                     | -0.00495 | 0.064505  |
| m2                     | 0.99393  | 0.066838  |
| m3                     | 0.020755 | 0.0030328 |
| Chisq                  | 0.06266  | NA        |
| R <sup>2</sup>         | 0.94885  | NA        |

# MegaTev T95S pos2

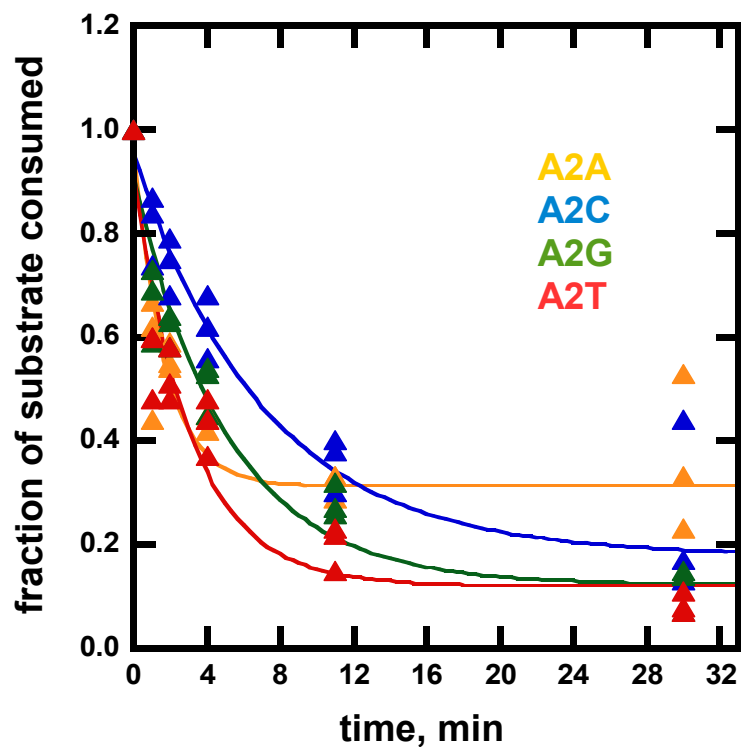

$$y = m1 + m2 \cdot \exp(-m3 \cdot x)$$

|                | Value   | Error    |
|----------------|---------|----------|
| m1             | 0.31188 | 0.043897 |
| m2             | 0.6555  | 0.078212 |
| m3             | 0.59496 | 0.16248  |
| Chisq          | 0.23485 | NA       |
| R <sup>2</sup> | 0.81546 | NA       |

$$y = m1 + m2 \cdot \exp(-m3 \cdot x)$$

|                | Value   | Error    |
|----------------|---------|----------|
| m1             | 0.17904 | 0.050323 |
| m2             | 0.77663 | 0.059173 |
| m3             | 0.14193 | 0.031114 |
| Chisq          | 0.13931 | NA       |
| R <sup>2</sup> | 0.91674 | NA       |

$$y = m1 + m2 \cdot \exp(-m3 \cdot x)$$

|                | Value   | Error    |
|----------------|---------|----------|
| m1             | 0.12238 | 0.040114 |
| m2             | 0.78879 | 0.052266 |
| m3             | 0.19654 | 0.036025 |
| Chisq          | 0.11316 | NA       |
| R <sup>2</sup> | 0.93438 | NA       |

$$y = m1 + m2 \cdot \exp(-m3 \cdot x)$$

|                | Value   | Error    |
|----------------|---------|----------|
| m1             | 0.1207  | 0.040596 |
| m2             | 0.79733 | 0.062159 |
| m3             | 0.32255 | 0.062283 |
| Chisq          | 0.15573 | NA       |
| R <sup>2</sup> | 0.9121  | NA       |



# MegaTev T95S pos3

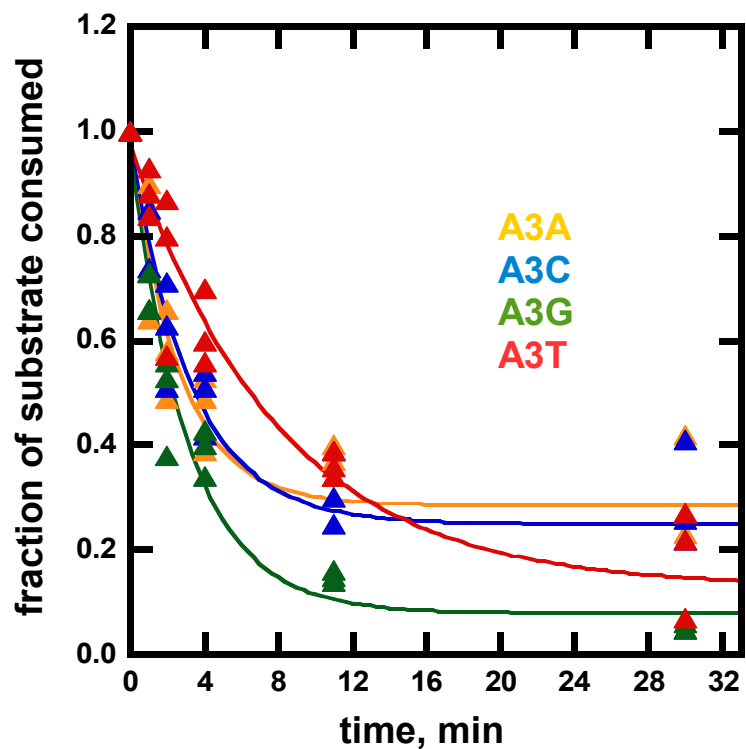

| y = m1 + m2*exp(-m3*x) |         |          |
|------------------------|---------|----------|
|                        | Value   | Error    |
| m1                     | 0.28559 | 0.042886 |
| m2                     | 0.70071 | 0.068791 |
| m3                     | 0.37838 | 0.088729 |
| Chisq                  | 0.18788 | NA       |
| R <sup>2</sup>         | 0.86765 | NA       |

| y = m1 + m2*exp(-m3*x) |         |          |
|------------------------|---------|----------|
|                        | Value   | Error    |
| m1                     | 0.24982 | 0.039975 |
| m2                     | 0.73126 | 0.060179 |
| m3                     | 0.30552 | 0.063136 |
| Chisq                  | 0.14672 | NA       |
| R <sup>2</sup>         | 0.90292 | NA       |

| y = m1 + m2*exp(-m3*x) |          |          |
|------------------------|----------|----------|
|                        | Value    | Error    |
| m1                     | 0.079482 | 0.027445 |
| m2                     | 0.88296  | 0.041892 |
| m3                     | 0.31934  | 0.037621 |
| Chisq                  | 0.070804 | NA       |
| R <sup>2</sup>         | 0.96553  | NA       |

| y = m1 + m2*exp(-m3*x) |         |          |
|------------------------|---------|----------|
|                        | Value   | Error    |
| m1                     | 0.12834 | 0.048705 |
| m2                     | 0.84633 | 0.055257 |
| m3                     | 0.12676 | 0.02406  |
| Chisq                  | 0.11731 | NA       |
| R <sup>2</sup>         | 0.9387  | NA       |

# MegaTev T95S pos4

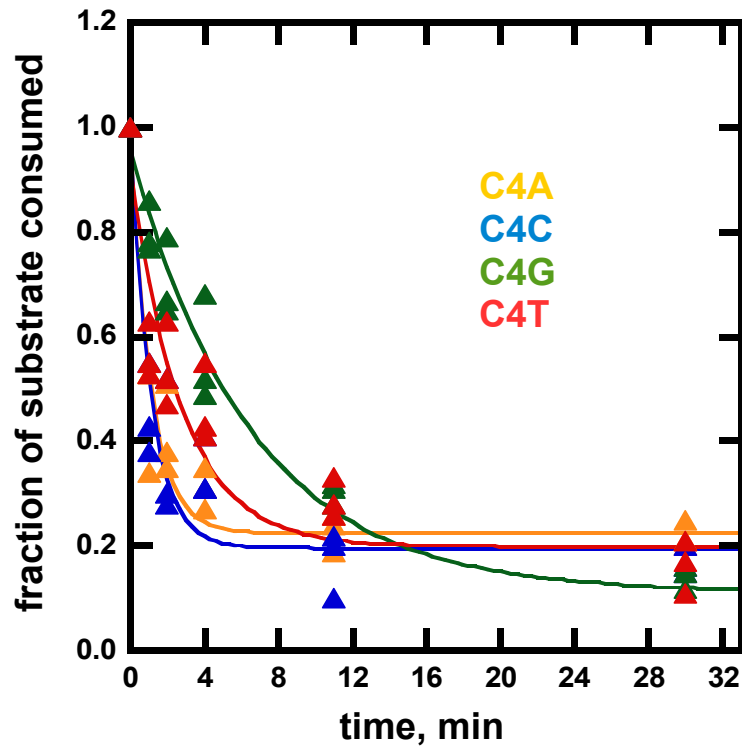

| y = m1 + m2*exp(-m3*x) |         |          |
|------------------------|---------|----------|
|                        | Value   | Error    |
| m1                     | 0.22453 | 0.030833 |
| m2                     | 0.75978 | 0.059689 |
| m3                     | 0.89549 | 0.16676  |
| Chisq                  | 0.13495 | NA       |
| R <sup>2</sup>         | 0.91018 | NA       |

| y = m1 + m2*exp(-m3*x) |         |          |
|------------------------|---------|----------|
|                        | Value   | Error    |
| m1                     | 0.19613 | 0.035054 |
| m2                     | 0.78689 | 0.067793 |
| m3                     | 0.89096 | 0.18179  |
| Chisq                  | 0.17409 | NA       |
| R <sup>2</sup>         | 0.89391 | NA       |

| y = m1 + m2*exp(-m3*x) |          |          |
|------------------------|----------|----------|
|                        | Value    | Error    |
| m1                     | 0.1125   | 0.034081 |
| m2                     | 0.84332  | 0.04113  |
| m3                     | 0.15412  | 0.021443 |
| Chisq                  | 0.068494 | NA       |
| R <sup>2</sup>         | 0.96377  | NA       |

| y = m1 + m2*exp(-m3*x) |         |          |
|------------------------|---------|----------|
|                        | Value   | Error    |
| m1                     | 0.19876 | 0.044415 |
| m2                     | 0.726   | 0.070366 |
| m3                     | 0.36192 | 0.084569 |
| Chisq                  | 0.1974  | NA       |
| R <sup>2</sup>         | 0.87054 | NA       |

# MegaTev T95S pos5

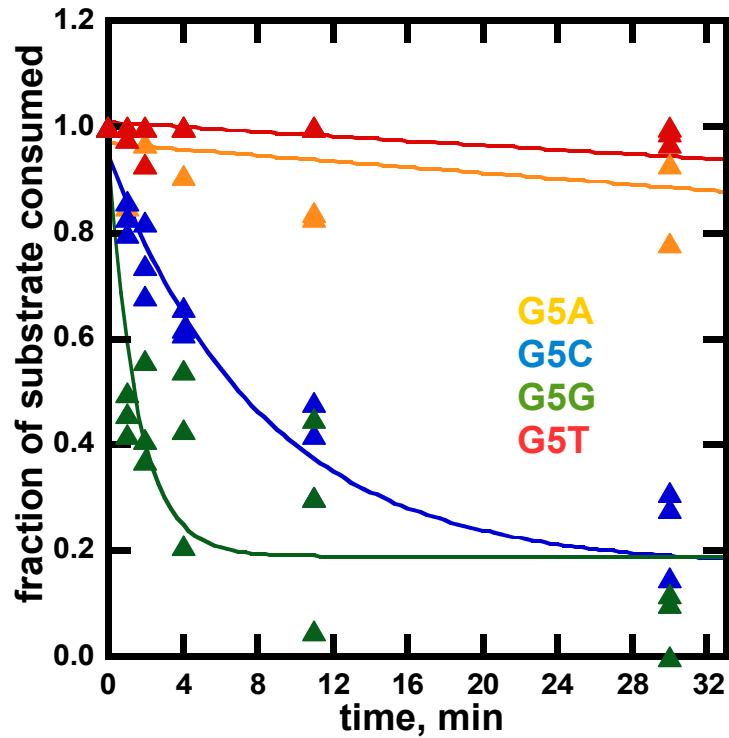

$$y = m1 + m2 \cdot \exp(-m3 \cdot x)$$

|                | Value     | Error     |
|----------------|-----------|-----------|
| m1             | -0.063471 | 0.16335   |
| m2             | 1.0325    | 0.15427   |
| m3             | 0.0027869 | 0.0020205 |
| Chisq          | 0.078241  | NA        |
| R <sup>2</sup> | 0.91694   | NA        |

$$y = m1 + m2 \cdot \exp(-m3 \cdot x)$$

|                | Value    | Error    |
|----------------|----------|----------|
| m1             | 0.17062  | 0.045821 |
| m2             | 0.77657  | 0.051349 |
| m3             | 0.12189  | 0.023499 |
| Chisq          | 0.099737 | NA       |
| R <sup>2</sup> | 0.9378   | NA       |

$$y = m1 + m2 \cdot \exp(-m3 \cdot x)$$

|                | Value   | Error    |
|----------------|---------|----------|
| m1             | 0.18952 | 0.055941 |
| m2             | 0.76419 | 0.10117  |
| m3             | 0.63969 | 0.1941   |
| Chisq          | 0.39154 | NA       |
| R <sup>2</sup> | 0.7819  | NA       |

$$y = m1 + m2 \cdot \exp(-m3 \cdot x)$$

|                | Value     | Error      |
|----------------|-----------|------------|
| m1             | -0.11144  | 0.17927    |
| m2             | 1.1202    | 0.17425    |
| m3             | 0.0019767 | 0.00096094 |
| Chisq          | 0.015064  | NA         |
| R <sup>2</sup> | 0.98396   | NA         |

# MegaTev T95S/Q158R pos1

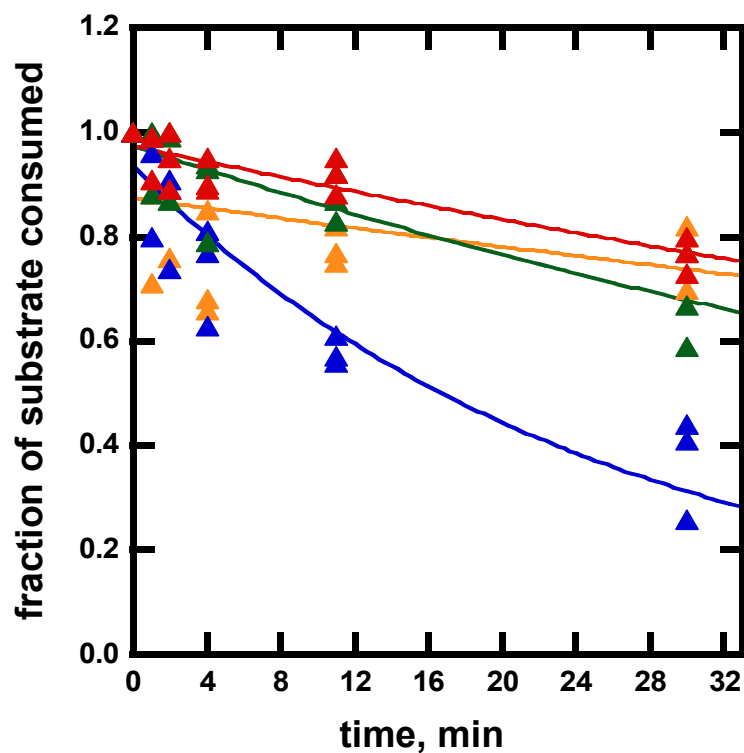

| y = m1 + m2*exp(-m3*x) |            |           |
|------------------------|------------|-----------|
|                        | Value      | Error     |
| m1                     | -0.0020138 | 0.11603   |
| m2                     | 0.87648    | 0.11912   |
| m3                     | 0.0056497  | 0.0034601 |
| Chisq                  | 0.2031     | NA        |
| R <sup>2</sup>         | 0.77588    | NA        |

| y = m1 + m2*exp(-m3*x) |          |           |
|------------------------|----------|-----------|
|                        | Value    | Error     |
| m1                     | 0.047326 | 0.083737  |
| m2                     | 0.88739  | 0.084607  |
| m3                     | 0.040194 | 0.0085418 |
| Chisq                  | 0.12017  | NA        |
| R <sup>2</sup>         | 0.91508  | NA        |

| y = m1 + m2*exp(-m3*x) |           |           |
|------------------------|-----------|-----------|
|                        | Value     | Error     |
| m1                     | 7.1902e-5 | 0.06238   |
| m2                     | 0.9739    | 0.064974  |
| m3                     | 0.012054  | 0.0021164 |
| Chisq                  | 0.062284  | NA        |
| R <sup>2</sup>         | 0.93803   | NA        |

| y = m1 + m2*exp(-m3*x) |             |          |
|------------------------|-------------|----------|
|                        | Value       | Error    |
| m1                     | -0.00046328 | 0.03911  |
| m2                     | 0.9743      | 0.040716 |
| m3                     | 0.0078091   | 0.001136 |
| Chisq                  | 0.024279    | NA       |
| R <sup>2</sup>         | 0.9734      | NA       |

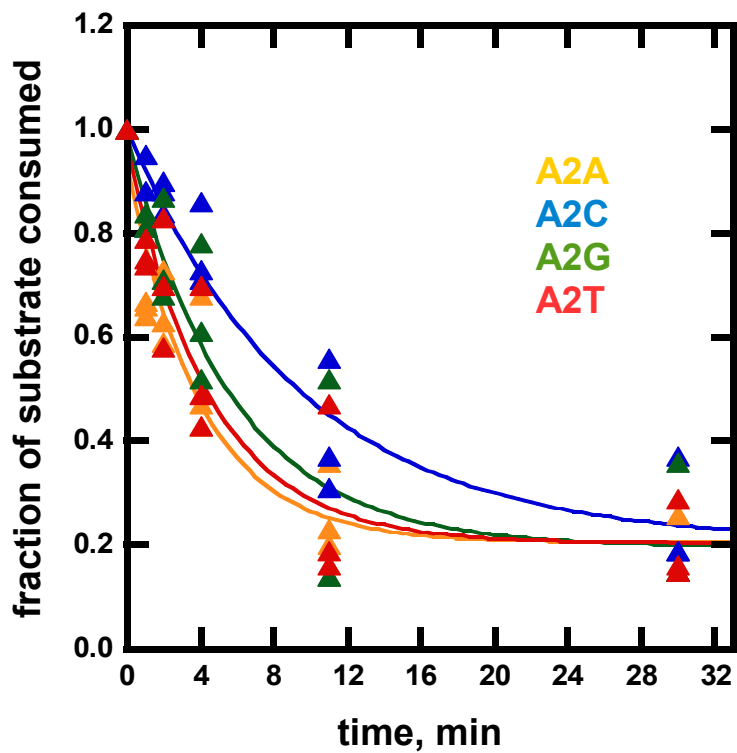

| y = m1 + m2*exp(-m3*x) |         |          |
|------------------------|---------|----------|
|                        | Value   | Error    |
| m1                     | 0.20594 | 0.046433 |
| m2                     | 0.72659 | 0.061173 |
| m3                     | 0.24988 | 0.055454 |
| Chisq                  | 0.13301 | NA       |
| R <sup>2</sup>         | 0.90397 | NA       |

| y = m1 + m2*exp(-m3*x) |          |          |
|------------------------|----------|----------|
|                        | Value    | Error    |
| m1                     | 0.20675  | 0.064398 |
| m2                     | 0.79405  | 0.064054 |
| m3                     | 0.10702  | 0.024629 |
| Chisq                  | 0.097529 | NA       |
| R <sup>2</sup>         | 0.93059  | NA       |

| y = m1 + m2*exp(-m3*x) |         |          |
|------------------------|---------|----------|
|                        | Value   | Error    |
| m1                     | 0.19726 | 0.066024 |
| m2                     | 0.78921 | 0.077232 |
| m3                     | 0.17626 | 0.048051 |
| Chisq                  | 0.20134 | NA       |
| R <sup>2</sup>         | 0.8775  | NA       |

| y = m1 + m2*exp(-m3*x) |         |          |
|------------------------|---------|----------|
|                        | Value   | Error    |
| m1                     | 0.20428 | 0.05301  |
| m2                     | 0.76398 | 0.066907 |
| m3                     | 0.22109 | 0.052309 |
| Chisq                  | 0.15772 | NA       |
| R <sup>2</sup>         | 0.89729 | NA       |

# MegaTev T95S/Q158R pos3

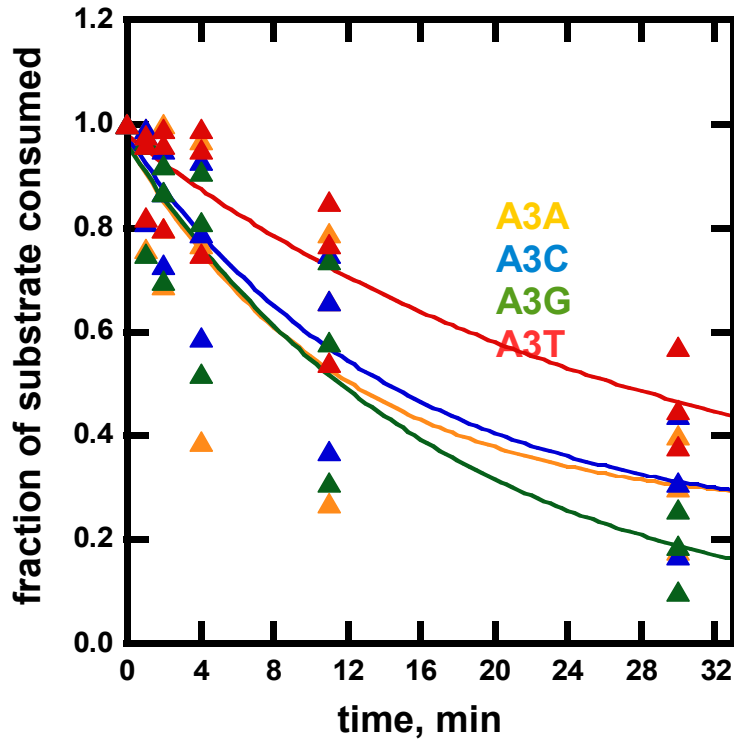

$$y = m1 + m2 \cdot \exp(-m3 \cdot x)$$

|                | Value    | Error    |
|----------------|----------|----------|
| m1             | 0.25221  | 0.17449  |
| m2             | 0.71219  | 0.16476  |
| m3             | 0.086468 | 0.055358 |
| Chisq          | 0.44336  | NA       |
| R <sup>2</sup> | 0.68517  | NA       |

$$y = m1 + m2 \cdot \exp(-m3 \cdot x)$$

|                | Value    | Error    |
|----------------|----------|----------|
| m1             | 0.2212   | 0.16712  |
| m2             | 0.75402  | 0.15439  |
| m3             | 0.070408 | 0.036997 |
| Chisq          | 0.22605  | NA       |
| R <sup>2</sup> | 0.81055  | NA       |

$$y = m1 + m2 \cdot \exp(-m3 \cdot x)$$

|                | Value    | Error    |
|----------------|----------|----------|
| m1             | 0.028476 | 0.24184  |
| m2             | 0.9319   | 0.22382  |
| m3             | 0.058648 | 0.032774 |
| Chisq          | 0.25757  | NA       |
| R <sup>2</sup> | 0.83496  | NA       |

$$y = m1 + m2 \cdot \exp(-m3 \cdot x)$$

|                | Value    | Error    |
|----------------|----------|----------|
| m1             | 0.2028   | 0.45907  |
| m2             | 0.77576  | 0.44045  |
| m3             | 0.036001 | 0.035733 |
| Chisq          | 0.14542  | NA       |
| R <sup>2</sup> | 0.79712  | NA       |



# MegaTev T95S/Q158R

pos4

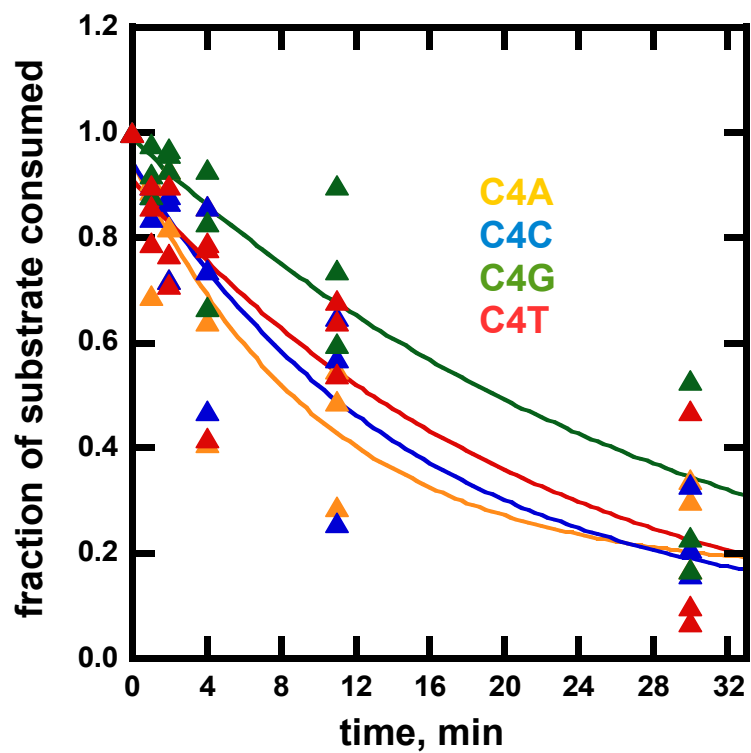

| y = m1 + m2*exp(-m3*x) |         |          |
|------------------------|---------|----------|
|                        | Value   | Error    |
| m1                     | 0.16141 | 0.085658 |
| m2                     | 0.78453 | 0.090063 |
| m3                     | 0.09778 | 0.032858 |
| Chisq                  | 0.27017 | NA       |
| R <sup>2</sup>         | 0.84463 | NA       |

| y = m1 + m2*exp(-m3*x) |          |          |
|------------------------|----------|----------|
|                        | Value    | Error    |
| m1                     | 0.073486 | 0.098503 |
| m2                     | 0.87107  | 0.098012 |
| m3                     | 0.066959 | 0.020335 |
| Chisq                  | 0.22662  | NA       |
| R <sup>2</sup>         | 0.87596  | NA       |

| y = m1 + m2*exp(-m3*x) |          |          |
|------------------------|----------|----------|
|                        | Value    | Error    |
| m1                     | -0.0184  | 0.1078   |
| m2                     | 1.0084   | 0.10984  |
| m3                     | 0.033973 | 0.007923 |
| Chisq                  | 0.19272  | NA       |
| R <sup>2</sup>         | 0.88789  | NA       |

| y = m1 + m2*exp(-m3*x) |            |          |
|------------------------|------------|----------|
|                        | Value      | Error    |
| m1                     | 0.00093228 | 0.12801  |
| m2                     | 0.91041    | 0.12833  |
| m3                     | 0.046626   | 0.015392 |
| Chisq                  | 0.29533    | NA       |
| R <sup>2</sup>         | 0.83317    | NA       |

# MegaTev T95S/Q158R pos5

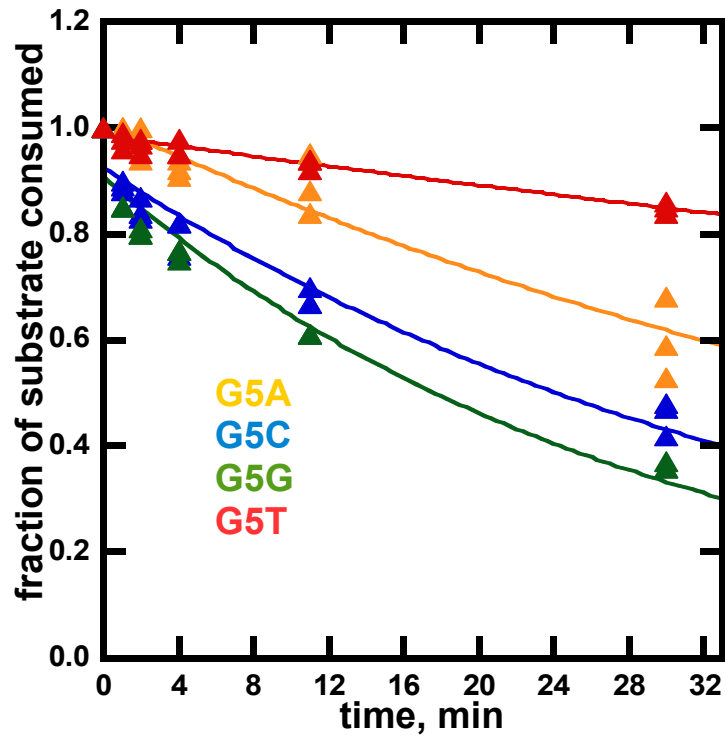

$$y = m1 + m2 \cdot \exp(-m3 \cdot x)$$

|                | Value      | Error     |
|----------------|------------|-----------|
| m1             | -0.0029847 | 0.042815  |
| m2             | 1.0125     | 0.044483  |
| m3             | 0.016264   | 0.0016409 |
| Chisq          | 0.029384   | NA        |
| R <sup>2</sup> | 0.97403    | NA        |

$$y = m1 + m2 \cdot \exp(-m3 \cdot x)$$

|                | Value    | Error     |
|----------------|----------|-----------|
| m1             | 0.011407 | 0.045335  |
| m2             | 0.91341  | 0.046668  |
| m3             | 0.025905 | 0.0027726 |
| Chisq          | 0.033285 | NA        |
| R <sup>2</sup> | 0.97029  | NA        |

$$y = m1 + m2 \cdot \exp(-m3 \cdot x)$$

|                | Value    | Error     |
|----------------|----------|-----------|
| m1             | 0.022233 | 0.049418  |
| m2             | 0.88538  | 0.050286  |
| m3             | 0.034937 | 0.0042712 |
| Chisq          | 0.040669 | NA        |
| R <sup>2</sup> | 0.96708  | NA        |

$$y = m1 + m2 \cdot \exp(-m3 \cdot x)$$

|                | Value      | Error      |
|----------------|------------|------------|
| m1             | -0.0072034 | 0.014673   |
| m2             | 0.99203    | 0.014818   |
| m3             | 0.0049198  | 0.00037166 |
| Chisq          | 0.0030346  | NA         |
| R <sup>2</sup> | 0.99661    | NA         |

# MegaTev Q158R pos1

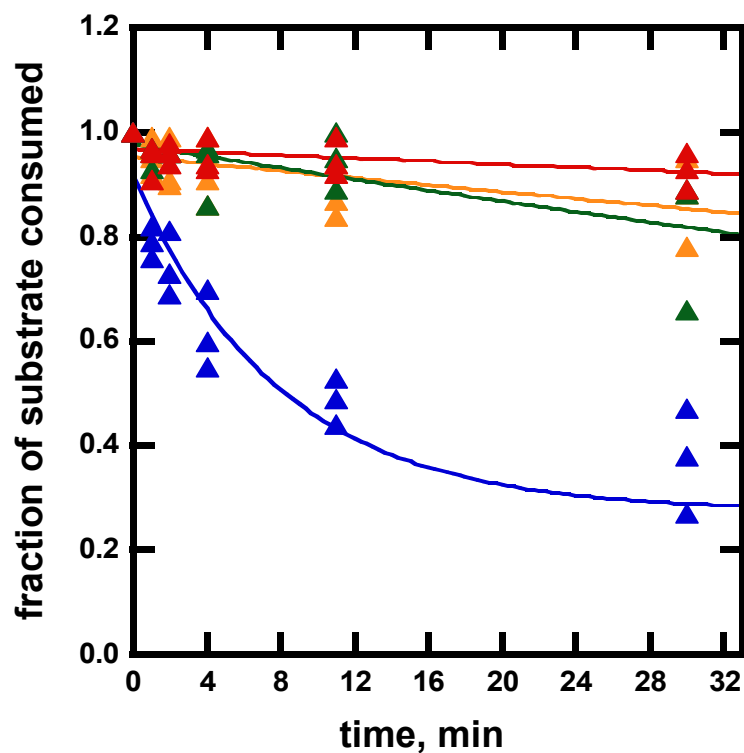

| y = m1 + m2*exp(-m3*x) |           |           |
|------------------------|-----------|-----------|
|                        | Value     | Error     |
| m1                     | -0.026509 | 0.075463  |
| m2                     | 0.98035   | 0.071863  |
| m3                     | 0.0036023 | 0.0015444 |
| Chisq                  | 0.04792   | NA        |
| R <sup>2</sup>         | 0.94574   | NA        |

| y = m1 + m2*exp(-m3*x) |         |          |
|------------------------|---------|----------|
|                        | Value   | Error    |
| m1                     | 0.2751  | 0.061319 |
| m2                     | 0.64376 | 0.069715 |
| m3                     | 0.12762 | 0.040154 |
| Chisq                  | 0.1872  | NA       |
| R <sup>2</sup>         | 0.84751 | NA       |

| y = m1 + m2*exp(-m3*x) |            |           |
|------------------------|------------|-----------|
|                        | Value      | Error     |
| m1                     | -0.0028867 | 0.060361  |
| m2                     | 0.97958    | 0.062173  |
| m3                     | 0.0058883  | 0.0016267 |
| Chisq                  | 0.055643   | NA        |
| R <sup>2</sup>         | 0.94057    | NA        |

| y = m1 + m2*exp(-m3*x) |            |           |
|------------------------|------------|-----------|
|                        | Value      | Error     |
| m1                     | -0.62468   | 1.1541    |
| m2                     | 1.5926     | 1.1488    |
| m3                     | 0.00093586 | 0.0011221 |
| Chisq                  | 0.014588   | NA        |
| R <sup>2</sup>         | 0.98351    | NA        |

# MegaTev Q158R pos2

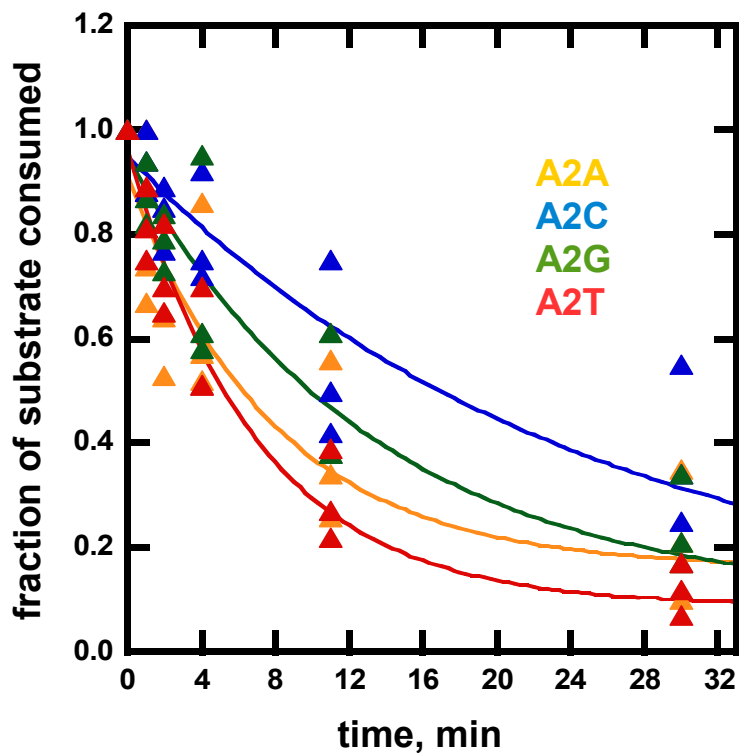

| y = m1 + m2*exp(-m3*x) |         |          |
|------------------------|---------|----------|
|                        | Value   | Error    |
| m1                     | 0.16104 | 0.082495 |
| m2                     | 0.75028 | 0.093645 |
| m3                     | 0.12699 | 0.04607  |
| Chisq                  | 0.33715 | NA       |
| R <sup>2</sup>         | 0.80727 | NA       |

| y = m1 + m2*exp(-m3*x) |          |         |
|------------------------|----------|---------|
|                        | Value    | Error   |
| m1                     | 0.052907 | 0.10489 |
| m2                     | 0.89651  | 0.10585 |
| m3                     | 0.041104 | 0.01089 |
| Chisq                  | 0.1897   | NA      |
| R <sup>2</sup>         | 0.87581  | NA      |

| y = m1 + m2*exp(-m3*x) |          |          |
|------------------------|----------|----------|
|                        | Value    | Error    |
| m1                     | 0.098367 | 0.082373 |
| m2                     | 0.84933  | 0.082675 |
| m3                     | 0.075774 | 0.020712 |
| Chisq                  | 0.18179  | NA       |
| R <sup>2</sup>         | 0.89768  | NA       |

| y = m1 + m2*exp(-m3*x) |          |          |
|------------------------|----------|----------|
|                        | Value    | Error    |
| m1                     | 0.088549 | 0.039789 |
| m2                     | 0.8743   | 0.047057 |
| m3                     | 0.14455  | 0.022344 |
| Chisq                  | 0.088491 | NA       |
| R <sup>2</sup>         | 0.95654  | NA       |

# MegaTev Q158R pos3

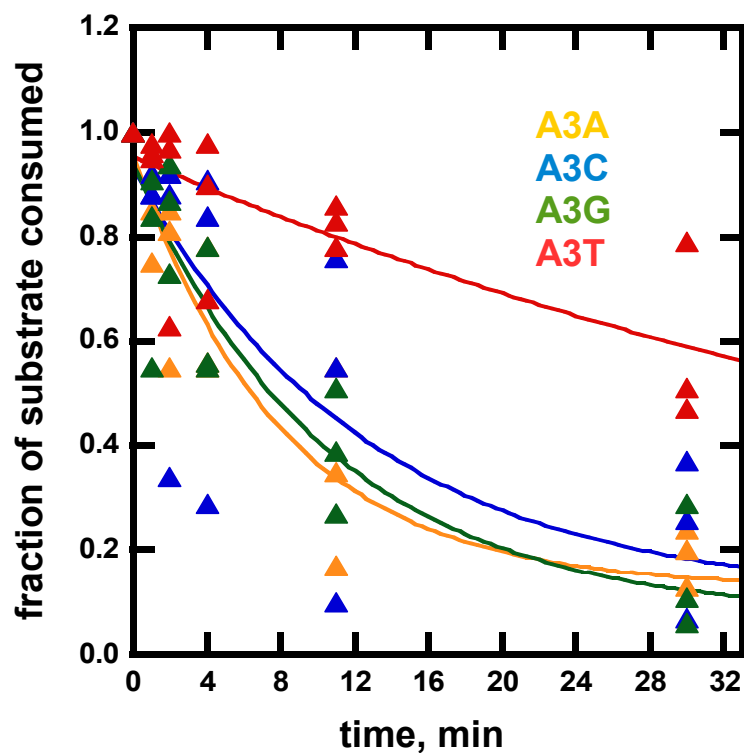

$$y = m1 + m2 \cdot \exp(-m3 \cdot x)$$

|                | Value   | Error    |
|----------------|---------|----------|
| m1             | 0.12894 | 0.066185 |
| m2             | 0.82865 | 0.074762 |
| m3             | 0.12502 | 0.032826 |
| Chisq          | 0.21362 | NA       |
| R <sup>2</sup> | 0.88945 | NA       |

$$y = m1 + m2 \cdot \exp(-m3 \cdot x)$$

|                | Value    | Error    |
|----------------|----------|----------|
| m1             | 0.10782  | 0.16591  |
| m2             | 0.82404  | 0.16748  |
| m3             | 0.079503 | 0.045933 |
| Chisq          | 0.78147  | NA       |
| R <sup>2</sup> | 0.66138  | NA       |

$$y = m1 + m2 \cdot \exp(-m3 \cdot x)$$

|                | Value    | Error    |
|----------------|----------|----------|
| m1             | 0.073303 | 0.083576 |
| m2             | 0.86696  | 0.087203 |
| m3             | 0.09477  | 0.027848 |
| Chisq          | 0.24734  | NA       |
| R <sup>2</sup> | 0.87797  | NA       |

$$y = m1 + m2 \cdot \exp(-m3 \cdot x)$$

|                | Value      | Error     |
|----------------|------------|-----------|
| m1             | 0.00086479 | 0.1177    |
| m2             | 0.95224    | 0.12231   |
| m3             | 0.016044   | 0.0047558 |
| Chisq          | 0.22204    | NA        |
| R <sup>2</sup> | 0.81383    | NA        |

# MegaTev Q158R pos4

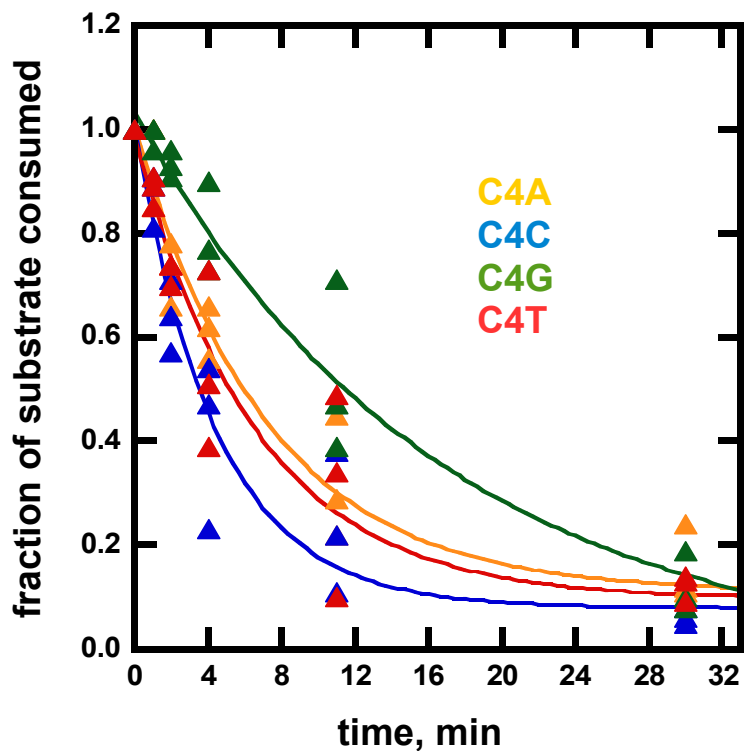

| y = m1 + m2*exp(-m3*x) |         |          |
|------------------------|---------|----------|
|                        | Value   | Error    |
| m1                     | 0.11006 | 0.043849 |
| m2                     | 0.89656 | 0.051368 |
| m3                     | 0.14026 | 0.023149 |
| Chisq                  | 0.10467 | NA       |
| R <sup>2</sup>         | 0.95123 | NA       |

| y = m1 + m2*exp(-m3*x) |          |          |
|------------------------|----------|----------|
|                        | Value    | Error    |
| m1                     | 0.080112 | 0.043863 |
| m2                     | 0.92785  | 0.059729 |
| m3                     | 0.22519  | 0.039152 |
| Chisq                  | 0.14767  | NA       |
| R <sup>2</sup>         | 0.93786  | NA       |

| y = m1 + m2*exp(-m3*x) |           |           |
|------------------------|-----------|-----------|
|                        | Value     | Error     |
| m1                     | -0.027379 | 0.064182  |
| m2                     | 1.0607    | 0.063762  |
| m3                     | 0.061044  | 0.0095634 |
| Chisq                  | 0.088146  | NA        |
| R <sup>2</sup>         | 0.9628    | NA        |

| y = m1 + m2*exp(-m3*x) |          |          |
|------------------------|----------|----------|
|                        | Value    | Error    |
| m1                     | 0.096095 | 0.053281 |
| m2                     | 0.89161  | 0.064085 |
| m3                     | 0.15247  | 0.0313   |
| Chisq                  | 0.16596  | NA       |
| R <sup>2</sup>         | 0.9246   | NA       |

# MegaTev Q158R pos5

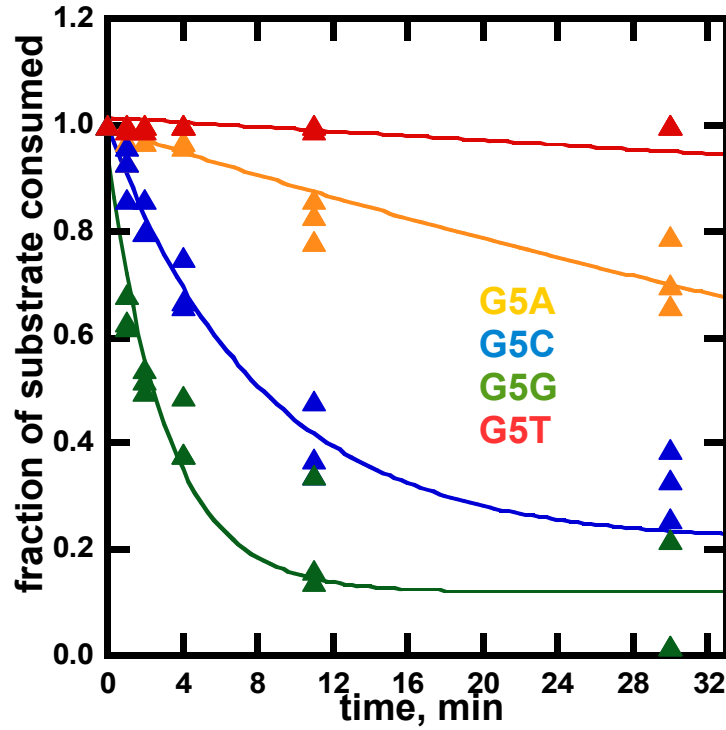

$$y = m1 + m2 \cdot \exp(-m3 \cdot x)$$

|                | Value     | Error     |
|----------------|-----------|-----------|
| m1             | 0.0015124 | 0.042501  |
| m2             | 0.99347   | 0.044274  |
| m3             | 0.011781  | 0.0013992 |
| Chisq          | 0.028909  | NA        |
| R <sup>2</sup> | 0.97125   | NA        |

$$y = m1 + m2 \cdot \exp(-m3 \cdot x)$$

|                | Value   | Error    |
|----------------|---------|----------|
| m1             | 0.21553 | 0.046915 |
| m2             | 0.78238 | 0.05268  |
| m3             | 0.12267 | 0.024071 |
| Chisq          | 0.10525 | NA       |
| R <sup>2</sup> | 0.93555 | NA       |

$$y = m1 + m2 \cdot \exp(-m3 \cdot x)$$

|                | Value   | Error    |
|----------------|---------|----------|
| m1             | 0.12043 | 0.038285 |
| m2             | 0.82409 | 0.058334 |
| m3             | 0.31749 | 0.055887 |
| Chisq          | 0.13737 | NA       |
| R <sup>2</sup> | 0.92637 | NA       |

$$y = m1 + m2 \cdot \exp(-m3 \cdot x)$$

|                | Value     | Error      |
|----------------|-----------|------------|
| m1             | -0.099781 | 0.16927    |
| m2             | 1.1139    | 0.16463    |
| m3             | 0.00196   | 0.00089618 |
| Chisq          | 0.01283   | NA         |
| R <sup>2</sup> | 0.98642   | NA         |

# MegaTev K26R/T95S pos1

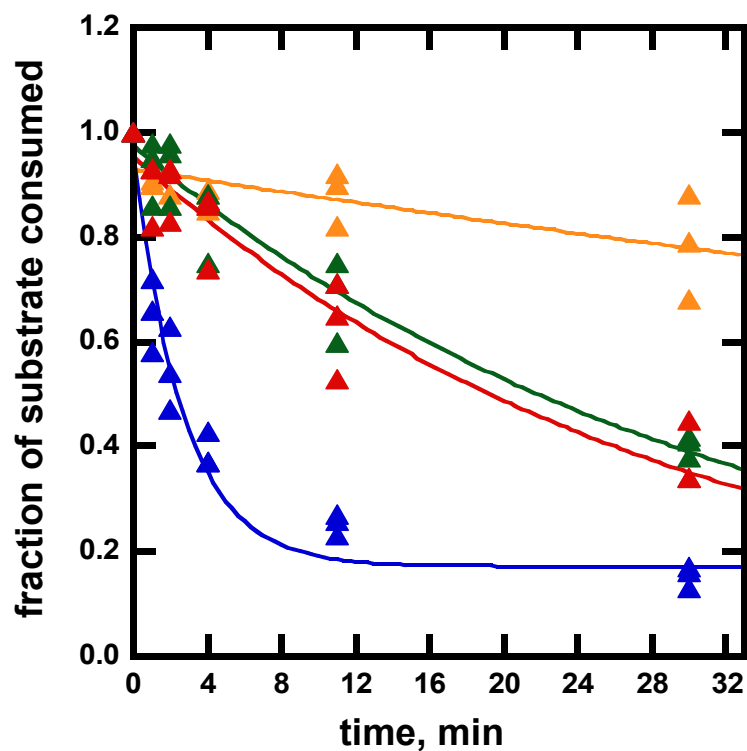

| y = m1 + m2*exp(-m3*x) |            |           |
|------------------------|------------|-----------|
|                        | Value      | Error     |
| m1                     | -0.0023415 | 0.058185  |
| m2                     | 0.93195    | 0.059938  |
| m3                     | 0.0058955  | 0.0016487 |
| Chisq                  | 0.05172    | NA        |
| R <sup>2</sup>         | 0.93907    | NA        |

| y = m1 + m2*exp(-m3*x) |          |          |
|------------------------|----------|----------|
|                        | Value    | Error    |
| m1                     | 0.17137  | 0.030238 |
| m2                     | 0.79213  | 0.0482   |
| m3                     | 0.36988  | 0.05401  |
| Chisq                  | 0.092431 | NA       |
| R <sup>2</sup>         | 0.94464  | NA       |

| y = m1 + m2*exp(-m3*x) |           |           |
|------------------------|-----------|-----------|
|                        | Value     | Error     |
| m1                     | 0.0075774 | 0.053106  |
| m2                     | 0.96691   | 0.05433   |
| m3                     | 0.030905  | 0.0036665 |
| Chisq                  | 0.04625   | NA        |
| R <sup>2</sup>         | 0.96649   | NA        |

| y = m1 + m2*exp(-m3*x) |          |           |
|------------------------|----------|-----------|
|                        | Value    | Error     |
| m1                     | 0.016369 | 0.061794  |
| m2                     | 0.93768  | 0.062926  |
| m3                     | 0.034377 | 0.0049501 |
| Chisq                  | 0.063433 | NA        |
| R <sup>2</sup>         | 0.95442  | NA        |



# MegaTev K26R/T95S pos2

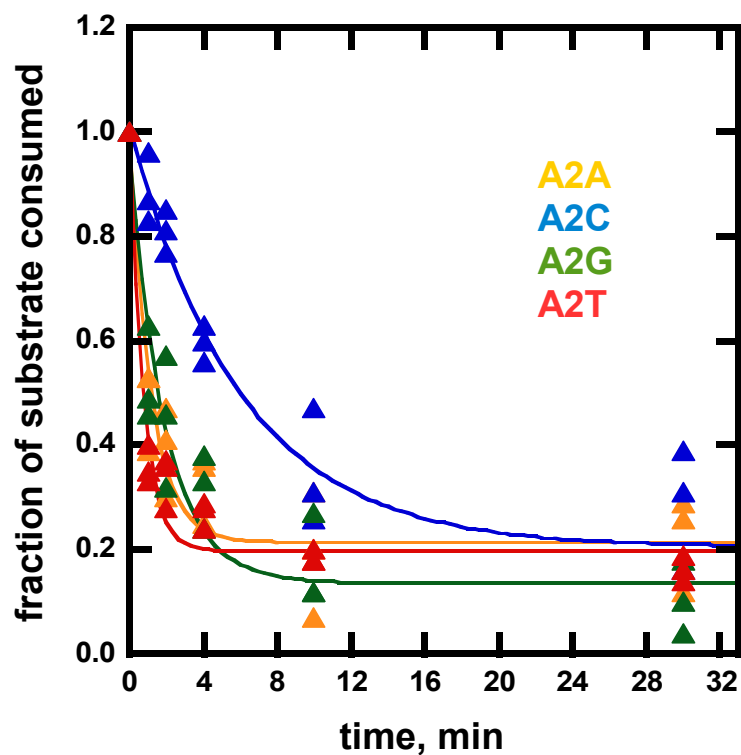

| y = m1 + m2*exp(-m3*x) |         |         |
|------------------------|---------|---------|
|                        | Value   | Error   |
| m1                     | 0.21336 | 0.03481 |
| m2                     | 0.77081 | 0.0666  |
| m3                     | 0.84754 | 0.17216 |
| Chisq                  | 0.16815 | NA      |
| R <sup>2</sup>         | 0.8934  | NA      |

| y = m1 + m2*exp(-m3*x) |         |          |
|------------------------|---------|----------|
|                        | Value   | Error    |
| m1                     | 0.20425 | 0.045937 |
| m2                     | 0.80583 | 0.056968 |
| m3                     | 0.16736 | 0.032183 |
| Chisq                  | 0.12972 | NA       |
| R <sup>2</sup>         | 0.92647 | NA       |

| y = m1 + m2*exp(-m3*x) |         |          |
|------------------------|---------|----------|
|                        | Value   | Error    |
| m1                     | 0.1362  | 0.037465 |
| m2                     | 0.82452 | 0.064412 |
| m3                     | 0.52415 | 0.094634 |
| Chisq                  | 0.16047 | NA       |
| R <sup>2</sup>         | 0.91161 | NA       |

| y = m1 + m2*exp(-m3*x) |          |          |
|------------------------|----------|----------|
|                        | Value    | Error    |
| m1                     | 0.19688  | 0.024161 |
| m2                     | 0.79614  | 0.05014  |
| m3                     | 1.3198   | 0.22341  |
| Chisq                  | 0.095329 | NA       |
| R <sup>2</sup>         | 0.94043  | NA       |

# MegaTev K26R/T95S pos3

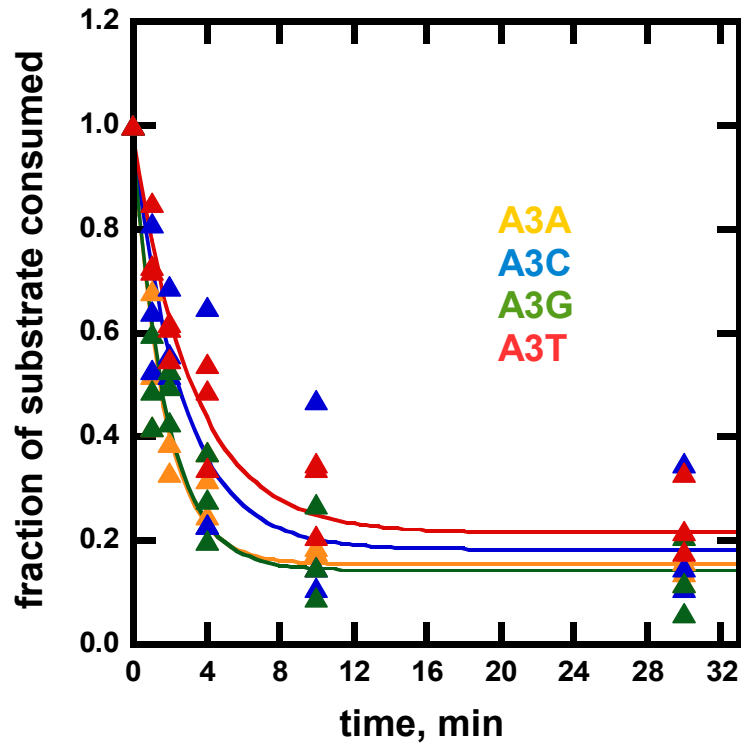

$$y = m1 + m2 \cdot \exp(-m3 \cdot x)$$

|                | Value   | Error    |
|----------------|---------|----------|
| m1             | 0.15515 | 0.032395 |
| m2             | 0.81822 | 0.057318 |
| m3             | 0.59152 | 0.09531  |
| Chisq          | 0.12616 | NA       |
| R <sup>2</sup> | 0.92759 | NA       |

$$y = m1 + m2 \cdot \exp(-m3 \cdot x)$$

|                | Value   | Error    |
|----------------|---------|----------|
| m1             | 0.18317 | 0.059482 |
| m2             | 0.78784 | 0.092965 |
| m3             | 0.37008 | 0.10575  |
| Chisq          | 0.34304 | NA       |
| R <sup>2</sup> | 0.81877 | NA       |

$$y = m1 + m2 \cdot \exp(-m3 \cdot x)$$

|                | Value   | Error    |
|----------------|---------|----------|
| m1             | 0.14259 | 0.036178 |
| m2             | 0.81787 | 0.062651 |
| m3             | 0.53997 | 0.095429 |
| Chisq          | 0.15153 | NA       |
| R <sup>2</sup> | 0.9147  | NA       |

$$y = m1 + m2 \cdot \exp(-m3 \cdot x)$$

|                | Value   | Error    |
|----------------|---------|----------|
| m1             | 0.2146  | 0.037207 |
| m2             | 0.7666  | 0.054966 |
| m3             | 0.3088  | 0.055577 |
| Chisq          | 0.12154 | NA       |
| R <sup>2</sup> | 0.92424 | NA       |

# MegaTev K26R/T95S pos4

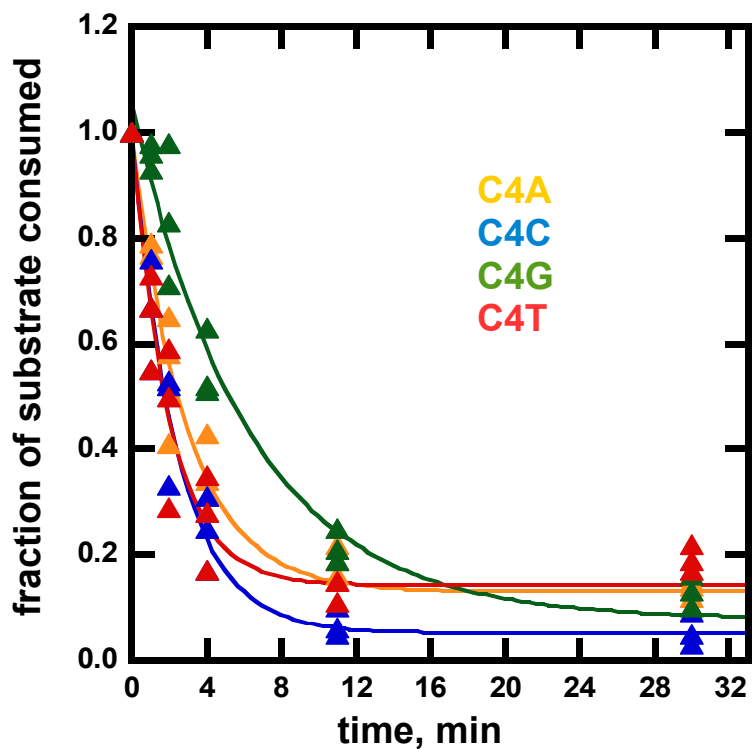

| y = m1 + m2*exp(-m3*x) |          |          |
|------------------------|----------|----------|
|                        | Value    | Error    |
| m1                     | 0.12972  | 0.027714 |
| m2                     | 0.86575  | 0.04338  |
| m3                     | 0.34707  | 0.042323 |
| Chisq                  | 0.075323 | NA       |
| R <sup>2</sup>         | 0.96175  | NA       |

| y = m1 + m2*exp(-m3*x) |          |          |
|------------------------|----------|----------|
|                        | Value    | Error    |
| m1                     | 0.052011 | 0.024693 |
| m2                     | 0.94087  | 0.040589 |
| m3                     | 0.41523  | 0.04208  |
| Chisq                  | 0.064867 | NA       |
| R <sup>2</sup>         | 0.97139  | NA       |

| y = m1 + m2*exp(-m3*x) |          |          |
|------------------------|----------|----------|
|                        | Value    | Error    |
| m1                     | 0.077682 | 0.039087 |
| m2                     | 0.9776   | 0.047841 |
| m3                     | 0.16119  | 0.022392 |
| Chisq                  | 0.093332 | NA       |
| R <sup>2</sup>         | 0.9634   | NA       |

| y = m1 + m2*exp(-m3*x) |         |          |
|------------------------|---------|----------|
|                        | Value   | Error    |
| m1                     | 0.14209 | 0.031293 |
| m2                     | 0.85372 | 0.053703 |
| m3                     | 0.49871 | 0.072186 |
| Chisq                  | 0.11194 | NA       |
| R <sup>2</sup>         | 0.94098 | NA       |

# MegaTev K26R/T95S pos5

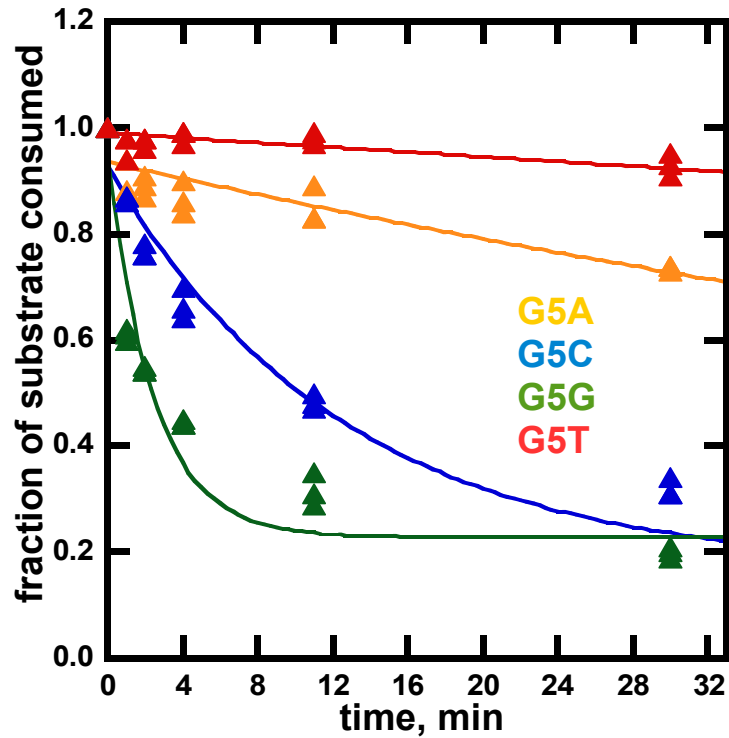

$$y = m1 + m2 \cdot \exp(-m3 \cdot x)$$

|                | Value      | Error     |
|----------------|------------|-----------|
| m1             | 0.00047886 | 0.041539  |
| m2             | 0.93406    | 0.043276  |
| m3             | 0.0083843  | 0.0012844 |
| Chisq          | 0.027478   | NA        |
| R <sup>2</sup> | 0.96766    | NA        |

$$y = m1 + m2 \cdot \exp(-m3 \cdot x)$$

|                | Value    | Error    |
|----------------|----------|----------|
| m1             | 0.16758  | 0.053877 |
| m2             | 0.75991  | 0.054462 |
| m3             | 0.080298 | 0.016397 |
| Chisq          | 0.083428 | NA       |
| R <sup>2</sup> | 0.93979  | NA       |

$$y = m1 + m2 \cdot \exp(-m3 \cdot x)$$

|                | Value   | Error    |
|----------------|---------|----------|
| m1             | 0.22841 | 0.034958 |
| m2             | 0.72074 | 0.057225 |
| m3             | 0.40859 | 0.076408 |
| Chisq          | 0.12912 | NA       |
| R <sup>2</sup> | 0.90929 | NA       |

$$y = m1 + m2 \cdot \exp(-m3 \cdot x)$$

|                | Value     | Error      |
|----------------|-----------|------------|
| m1             | -0.13462  | 0.097474   |
| m2             | 1.1247    | 0.094452   |
| m3             | 0.0020631 | 0.00057061 |
| Chisq          | 0.0056123 | NA         |
| R <sup>2</sup> | 0.99381   | NA         |

# MegaTev K26R/Q158R pos1

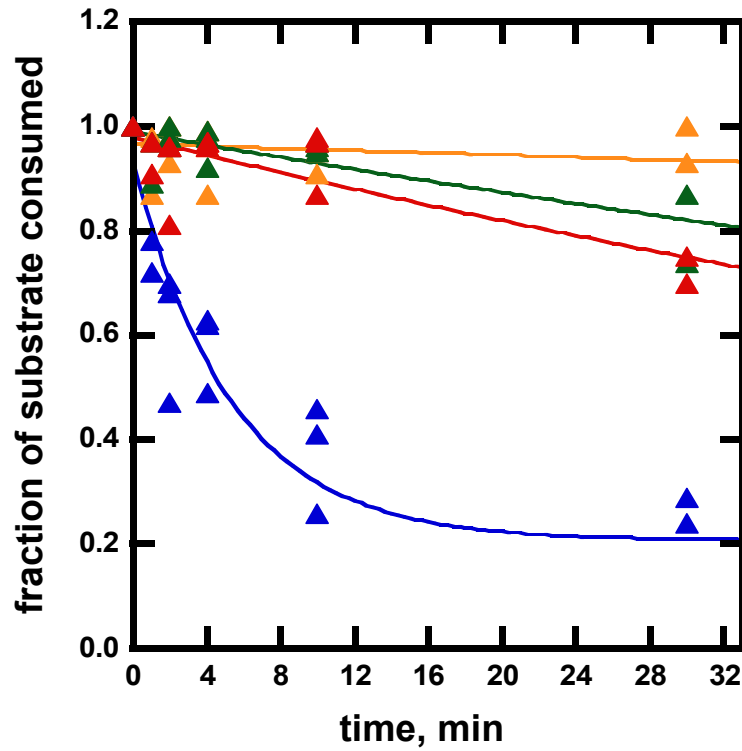

| y = m1 + m2*exp(-m3*x) |            |           |
|------------------------|------------|-----------|
|                        | Value      | Error     |
| m1                     | -4.6019    | 67.127    |
| m2                     | 5.5679     | 67.118    |
| m3                     | 0.00019019 | 0.0025268 |
| Chisq                  | 0.031282   | NA        |
| R <sup>2</sup>         | 0.96507    | NA        |

| y = m1 + m2*exp(-m3*x) |         |          |
|------------------------|---------|----------|
|                        | Value   | Error    |
| m1                     | 0.20691 | 0.062456 |
| m2                     | 0.7246  | 0.076685 |
| m3                     | 0.18768 | 0.051353 |
| Chisq                  | 0.17559 | NA       |
| R <sup>2</sup>         | 0.86683 | NA       |

| y = m1 + m2*exp(-m3*x) |            |           |
|------------------------|------------|-----------|
|                        | Value      | Error     |
| m1                     | -0.0023531 | 0.042864  |
| m2                     | 0.99083    | 0.044384  |
| m3                     | 0.0061857  | 0.0013599 |
| Chisq                  | 0.024809   | NA        |
| R <sup>2</sup>         | 0.97293    | NA        |

| y = m1 + m2*exp(-m3*x) |            |           |
|------------------------|------------|-----------|
|                        | Value      | Error     |
| m1                     | -0.0010714 | 0.056941  |
| m2                     | 0.98       | 0.059587  |
| m3                     | 0.0089022  | 0.0019976 |
| Chisq                  | 0.045259   | NA        |
| R <sup>2</sup>         | 0.95146    | NA        |

# MegaTev K26R/Q158R pos2

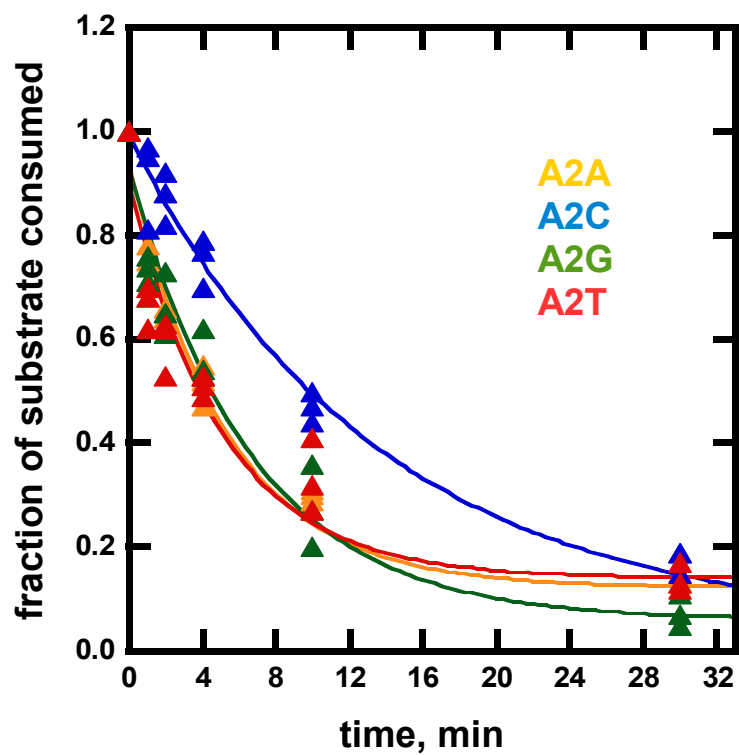

$$y = m1 + m2 \cdot \exp(-m3 \cdot x)$$

|                | Value    | Error    |
|----------------|----------|----------|
| m1             | 0.12239  | 0.030276 |
| m2             | 0.81497  | 0.038803 |
| m3             | 0.18937  | 0.024238 |
| Chisq          | 0.060866 | NA       |
| R <sup>2</sup> | 0.96508  | NA       |

$$y = m1 + m2 \cdot \exp(-m3 \cdot x)$$

|                | Value    | Error     |
|----------------|----------|-----------|
| m1             | 0.046216 | 0.036581  |
| m2             | 0.94616  | 0.036684  |
| m3             | 0.074632 | 0.0081468 |
| Chisq          | 0.035526 | NA        |
| R <sup>2</sup> | 0.98196  | NA        |

$$y = m1 + m2 \cdot \exp(-m3 \cdot x)$$

|                | Value    | Error    |
|----------------|----------|----------|
| m1             | 0.059604 | 0.035195 |
| m2             | 0.87078  | 0.042451 |
| m3             | 0.15131  | 0.020287 |
| Chisq          | 0.070968 | NA       |
| R <sup>2</sup> | 0.96388  | NA       |

$$y = m1 + m2 \cdot \exp(-m3 \cdot x)$$

|                | Value   | Error    |
|----------------|---------|----------|
| m1             | 0.14042 | 0.044623 |
| m2             | 0.7603  | 0.05774  |
| m3             | 0.19632 | 0.039944 |
| Chisq          | 0.13505 | NA       |
| R <sup>2</sup> | 0.91564 | NA       |

# MegaTev K26R/Q158R pos3

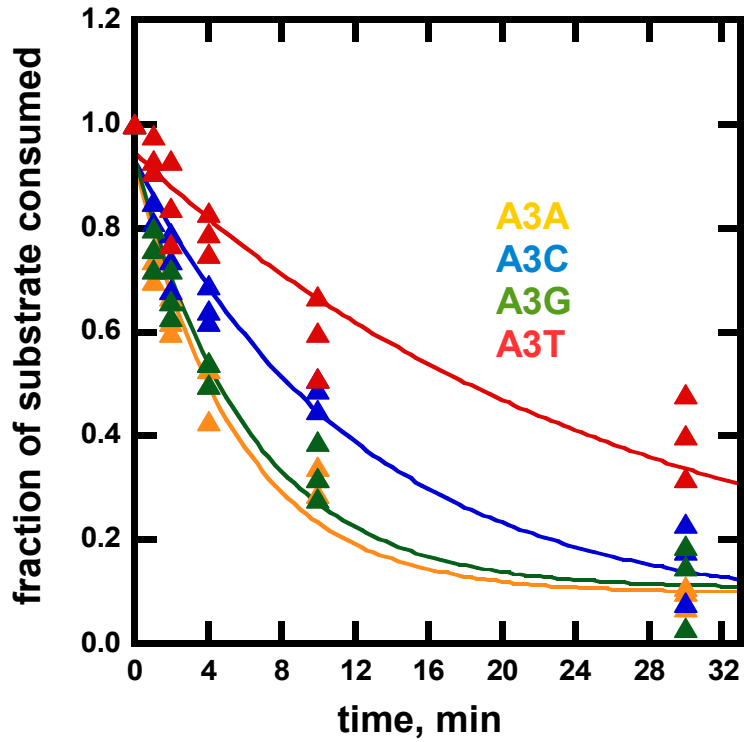

$$y = m1 + m2 \cdot \exp(-m3 \cdot x)$$

|                | Value    | Error    |
|----------------|----------|----------|
| m1             | 0.097534 | 0.033936 |
| m2             | 0.83072  | 0.043005 |
| m3             | 0.18148  | 0.025355 |
| Chisq          | 0.074528 | NA       |
| R <sup>2</sup> | 0.95903  | NA       |

$$y = m1 + m2 \cdot \exp(-m3 \cdot x)$$

|                | Value    | Error    |
|----------------|----------|----------|
| m1             | 0.065676 | 0.047816 |
| m2             | 0.86543  | 0.048638 |
| m3             | 0.082159 | 0.013233 |
| Chisq          | 0.068317 | NA       |
| R <sup>2</sup> | 0.96068  | NA       |

$$y = m1 + m2 \cdot \exp(-m3 \cdot x)$$

|                | Value    | Error    |
|----------------|----------|----------|
| m1             | 0.10647  | 0.035422 |
| m2             | 0.82953  | 0.043593 |
| m3             | 0.16269  | 0.023323 |
| Chisq          | 0.075686 | NA       |
| R <sup>2</sup> | 0.95806  | NA       |

$$y = m1 + m2 \cdot \exp(-m3 \cdot x)$$

|                | Value    | Error     |
|----------------|----------|-----------|
| m1             | 0.046285 | 0.07322   |
| m2             | 0.89831  | 0.074097  |
| m3             | 0.037612 | 0.0068908 |
| Chisq          | 0.090396 | NA        |
| R <sup>2</sup> | 0.93359  | NA        |

# MegaTev K26R/Q158R

pos4

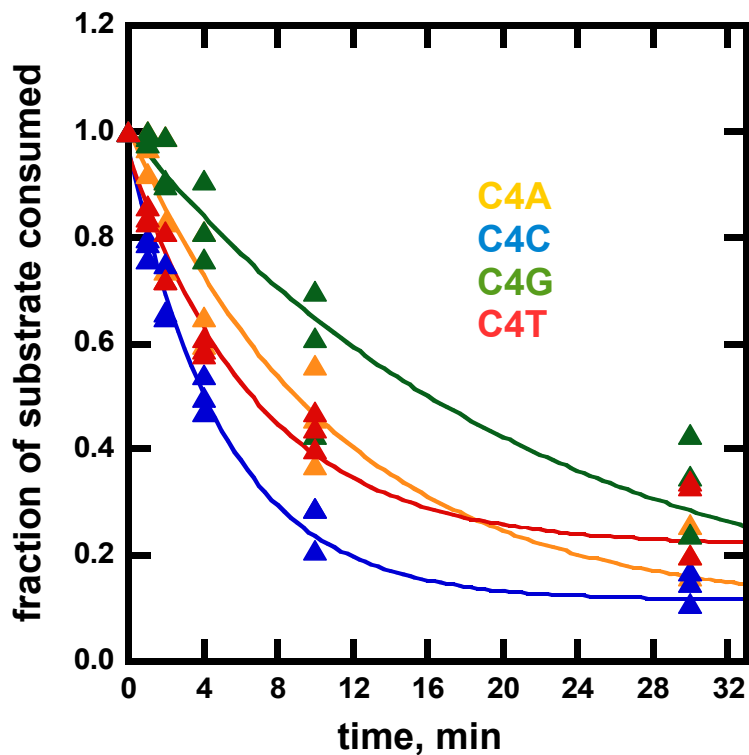

| y = m1 + m2*exp(-m3*x) |          |          |
|------------------------|----------|----------|
|                        | Value    | Error    |
| m1                     | 0.10024  | 0.056598 |
| m2                     | 0.90507  | 0.058823 |
| m3                     | 0.090964 | 0.017086 |
| Chisq                  | 0.10889  | NA       |
| R <sup>2</sup>         | 0.94522  | NA       |

| y = m1 + m2*exp(-m3*x) |          |          |
|------------------------|----------|----------|
|                        | Value    | Error    |
| m1                     | 0.11641  | 0.02412  |
| m2                     | 0.85401  | 0.031223 |
| m3                     | 0.19663  | 0.019257 |
| Chisq                  | 0.039495 | NA       |
| R <sup>2</sup>         | 0.97909  | NA       |

| y = m1 + m2*exp(-m3*x) |          |           |
|------------------------|----------|-----------|
|                        | Value    | Error     |
| m1                     | 0.051778 | 0.075175  |
| m2                     | 0.95149  | 0.075149  |
| m3                     | 0.046934 | 0.0088426 |
| Chisq                  | 0.10212  | NA        |
| R <sup>2</sup>         | 0.94     | NA        |

| y = m1 + m2*exp(-m3*x) |         |          |
|------------------------|---------|----------|
|                        | Value   | Error    |
| m1                     | 0.21859 | 0.04191  |
| m2                     | 0.74175 | 0.050092 |
| m3                     | 0.14654 | 0.027322 |
| Chisq                  | 0.09822 | NA       |
| R <sup>2</sup>         | 0.93312 | NA       |



# MegaTev K26R/Q158R pos5

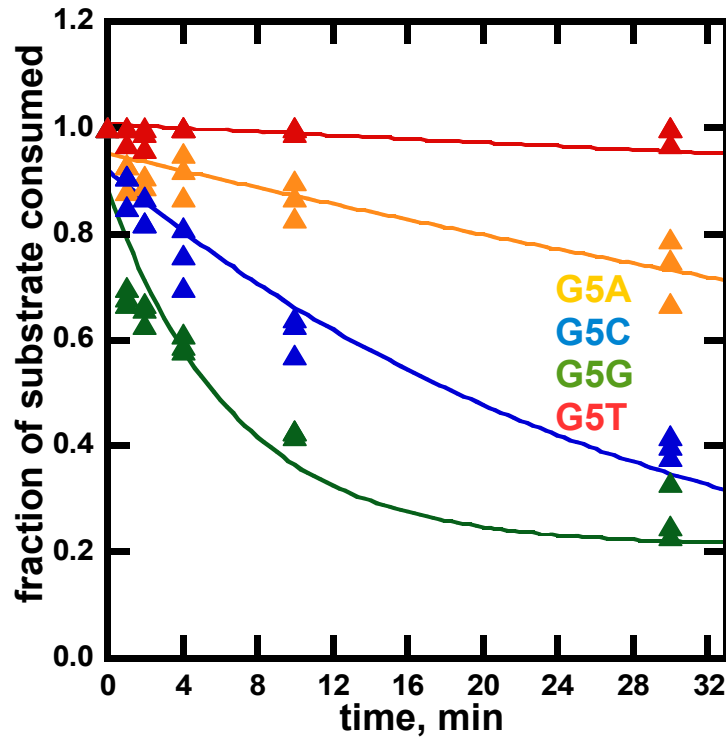

| y = m1 + m2*exp(-m3*x) |           |           |
|------------------------|-----------|-----------|
|                        | Value     | Error     |
| m1                     | 0.0002378 | 0.041986  |
| m2                     | 0.95091   | 0.043729  |
| m3                     | 0.0087586 | 0.0013015 |
| Chisq                  | 0.028111  | NA        |
| R <sup>2</sup>         | 0.96824   | NA        |

| y = m1 + m2*exp(-m3*x) |          |           |
|------------------------|----------|-----------|
|                        | Value    | Error     |
| m1                     | 0.035181 | 0.059078  |
| m2                     | 0.88479  | 0.060039  |
| m3                     | 0.03465  | 0.0051239 |
| Chisq                  | 0.058    | NA        |
| R <sup>2</sup>         | 0.95317  | NA        |

| y = m1 + m2*exp(-m3*x) |         |          |
|------------------------|---------|----------|
|                        | Value   | Error    |
| m1                     | 0.21358 | 0.052693 |
| m2                     | 0.67069 | 0.0633   |
| m3                     | 0.14917 | 0.038785 |
| Chisq                  | 0.15739 | NA       |
| R <sup>2</sup>         | 0.877   | NA       |

| y = m1 + m2*exp(-m3*x) |           |            |
|------------------------|-----------|------------|
|                        | Value     | Error      |
| m1                     | -0.39189  | 0.43115    |
| m2                     | 1.3982    | 0.42732    |
| m3                     | 0.001247  | 0.00076141 |
| Chisq                  | 0.0079874 | NA         |
| R <sup>2</sup>         | 0.99148   | NA         |

# MegaTev K26R pos1

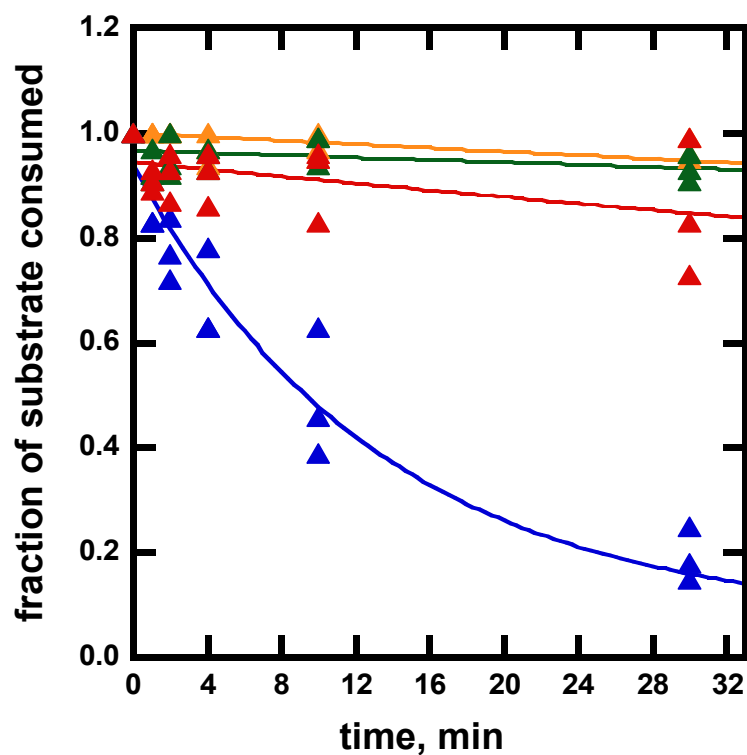

| y = m1 + m2*exp(-m3*x) |           |            |
|------------------------|-----------|------------|
|                        | Value     | Error      |
| m1                     | -0.18643  | 0.33668    |
| m2                     | 1.1861    | 0.33193    |
| m3                     | 0.0015082 | 0.00098842 |
| Chisq                  | 0.012659  | NA         |
| R <sup>2</sup>         | 0.98635   | NA         |

| y = m1 + m2*exp(-m3*x) |          |          |
|------------------------|----------|----------|
|                        | Value    | Error    |
| m1                     | 0.069828 | 0.0585   |
| m2                     | 0.86876  | 0.058756 |
| m3                     | 0.075592 | 0.014436 |
| Chisq                  | 0.092257 | NA       |
| R <sup>2</sup>         | 0.94666  | NA       |

| y = m1 + m2*exp(-m3*x) |            |           |
|------------------------|------------|-----------|
|                        | Value      | Error     |
| m1                     | -2.6177    | 13.947    |
| m2                     | 3.5842     | 13.941    |
| m3                     | 0.00031402 | 0.0014366 |
| Chisq                  | 0.017343   | NA        |
| R <sup>2</sup>         | 0.98047    | NA        |

| y = m1 + m2*exp(-m3*x) |           |           |
|------------------------|-----------|-----------|
|                        | Value     | Error     |
| m1                     | -0.028536 | 0.09364   |
| m2                     | 0.97274   | 0.088973  |
| m3                     | 0.0035268 | 0.0018846 |
| Chisq                  | 0.06886   | NA        |
| R <sup>2</sup>         | 0.92249   | NA        |

# MegaTev K26R pos2

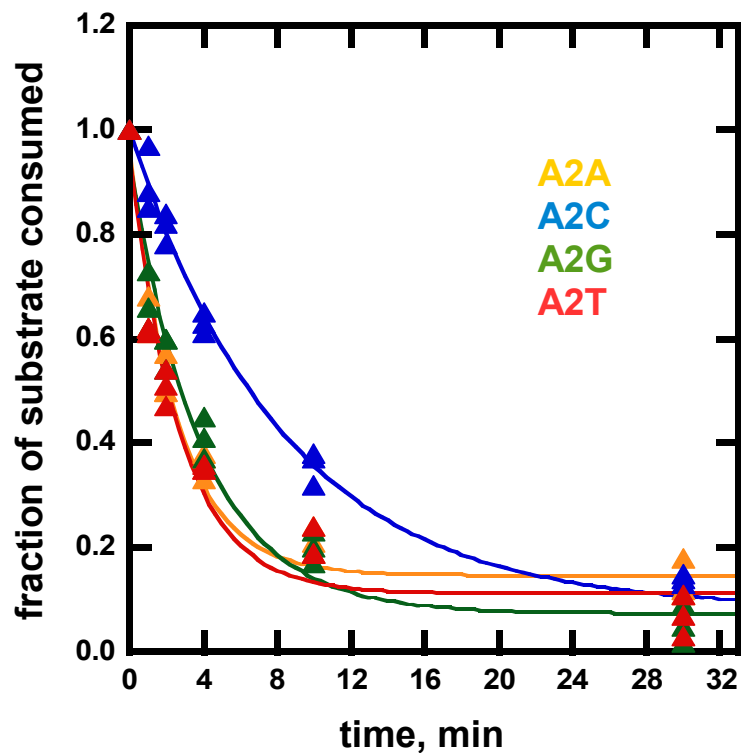

| y = m1 + m2*exp(-m3*x) |          |          |
|------------------------|----------|----------|
|                        | Value    | Error    |
| m1                     | 0.14694  | 0.024994 |
| m2                     | 0.81841  | 0.039637 |
| m3                     | 0.38855  | 0.045161 |
| Chisq                  | 0.062121 | NA       |
| R <sup>2</sup>         | 0.96407  | NA       |

| y = m1 + m2*exp(-m3*x) |         |          |
|------------------------|---------|----------|
|                        | Value   | Error    |
| m1                     | 0.08278 | 0.022637 |
| m2                     | 0.91795 | 0.025546 |
| m3                     | 0.121   | 0.009538 |
| Chisq                  | 0.0242  | NA       |
| R <sup>2</sup>         | 0.98833 | NA       |

| y = m1 + m2*exp(-m3*x) |          |          |
|------------------------|----------|----------|
|                        | Value    | Error    |
| m1                     | 0.073651 | 0.028282 |
| m2                     | 0.86988  | 0.039399 |
| m3                     | 0.2554   | 0.030039 |
| Chisq                  | 0.063026 | NA       |
| R <sup>2</sup>         | 0.96824  | NA       |

| y = m1 + m2*exp(-m3*x) |          |          |
|------------------------|----------|----------|
|                        | Value    | Error    |
| m1                     | 0.11235  | 0.027525 |
| m2                     | 0.84221  | 0.042966 |
| m3                     | 0.36855  | 0.045565 |
| Chisq                  | 0.073298 | NA       |
| R <sup>2</sup>         | 0.96027  | NA       |

# MegaTev K26R pos3

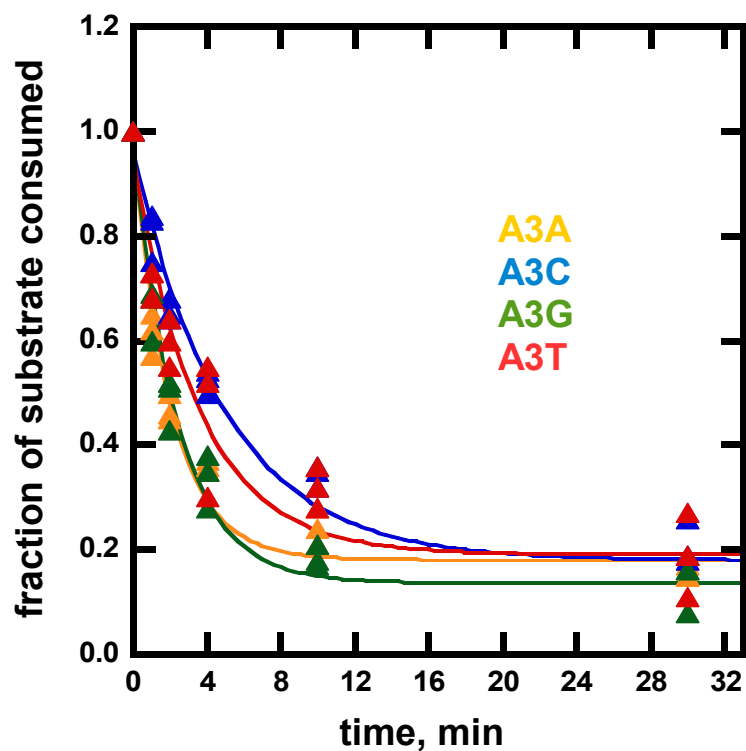

$$y = m1 + m2 \cdot \exp(-m3 \cdot x)$$

|                | Value    | Error    |
|----------------|----------|----------|
| m1             | 0.1806   | 0.026243 |
| m2             | 0.79132  | 0.044232 |
| m3             | 0.4843   | 0.06297  |
| Chisq          | 0.076072 | NA       |
| R <sup>2</sup> | 0.95273  | NA       |

$$y = m1 + m2 \cdot \exp(-m3 \cdot x)$$

|                | Value    | Error    |
|----------------|----------|----------|
| m1             | 0.17991  | 0.031307 |
| m2             | 0.78421  | 0.040864 |
| m3             | 0.20281  | 0.028225 |
| Chisq          | 0.067745 | NA       |
| R <sup>2</sup> | 0.9584   | NA       |

$$y = m1 + m2 \cdot \exp(-m3 \cdot x)$$

|                | Value    | Error    |
|----------------|----------|----------|
| m1             | 0.13665  | 0.022854 |
| m2             | 0.8418   | 0.036987 |
| m3             | 0.41673  | 0.043425 |
| Chisq          | 0.053793 | NA       |
| R <sup>2</sup> | 0.97026  | NA       |

$$y = m1 + m2 \cdot \exp(-m3 \cdot x)$$

|                | Value   | Error    |
|----------------|---------|----------|
| m1             | 0.19097 | 0.040226 |
| m2             | 0.76295 | 0.057712 |
| m3             | 0.28127 | 0.054364 |
| Chisq          | 0.13471 | NA       |
| R <sup>2</sup> | 0.91627 | NA       |

# MegaTev K26R pos4

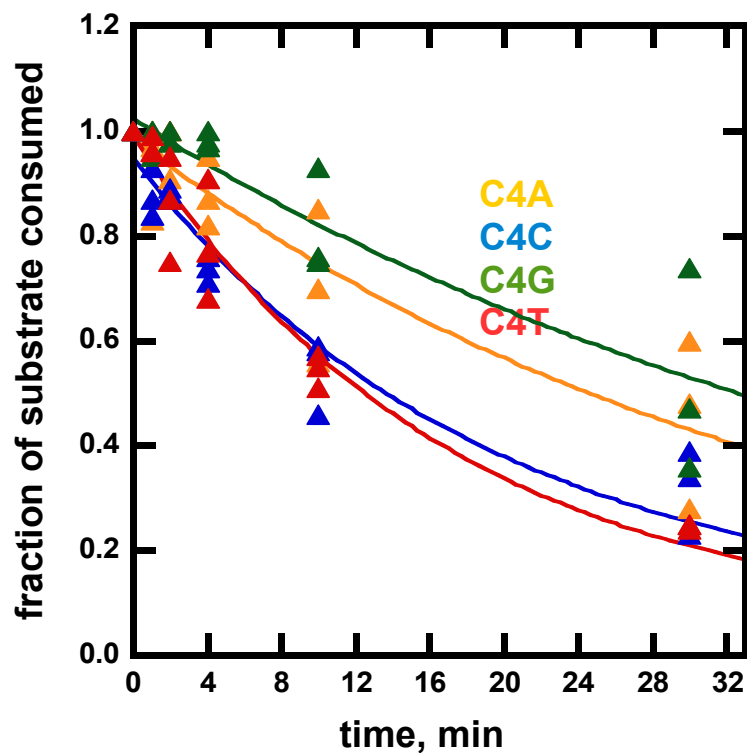

$$y = m1 + m2 \cdot \exp(-m3 \cdot x)$$

|                | Value     | Error     |
|----------------|-----------|-----------|
| m1             | 0.0097642 | 0.09245   |
| m2             | 0.97586   | 0.094814  |
| m3             | 0.028024  | 0.0057781 |
| Chisq          | 0.13897   | NA        |
| R <sup>2</sup> | 0.90248   | NA        |

$$y = m1 + m2 \cdot \exp(-m3 \cdot x)$$

|                | Value    | Error     |
|----------------|----------|-----------|
| m1             | 0.076018 | 0.061012  |
| m2             | 0.87107  | 0.060656  |
| m3             | 0.052815 | 0.0091856 |
| Chisq          | 0.071639 | NA        |
| R <sup>2</sup> | 0.95199  | NA        |

$$y = m1 + m2 \cdot \exp(-m3 \cdot x)$$

|                | Value      | Error     |
|----------------|------------|-----------|
| m1             | -0.0027385 | 0.082203  |
| m2             | 1.0256     | 0.084921  |
| m3             | 0.021843   | 0.0038887 |
| Chisq          | 0.10875    | NA        |
| R <sup>2</sup> | 0.92074    | NA        |

$$y = m1 + m2 \cdot \exp(-m3 \cdot x)$$

|                | Value    | Error     |
|----------------|----------|-----------|
| m1             | 0.049325 | 0.05566   |
| m2             | 0.94194  | 0.055185  |
| m3             | 0.059166 | 0.0090551 |
| Chisq          | 0.064778 | NA        |
| R <sup>2</sup> | 0.9643   | NA        |

# MegaTev K26R pos5

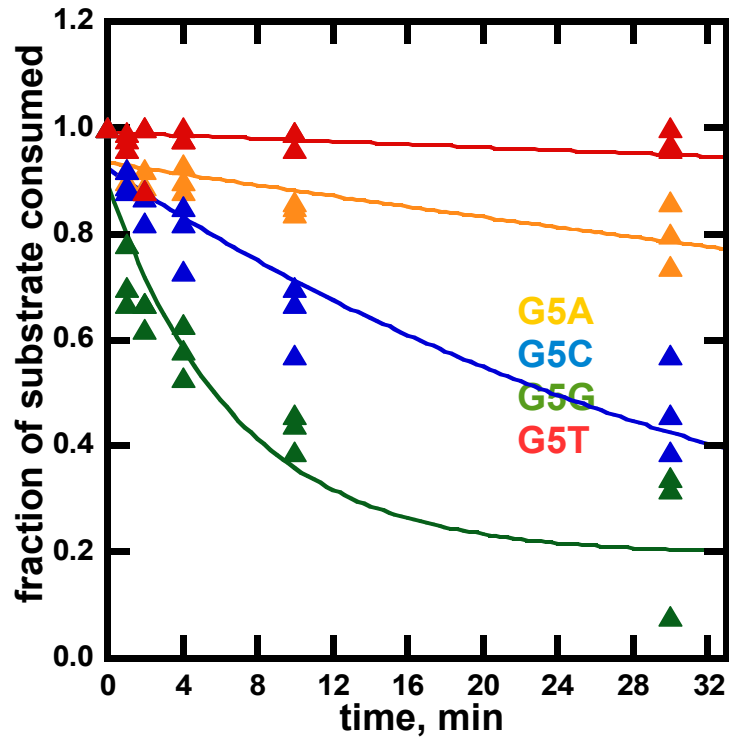

$$y = m1 + m2 \cdot \exp(-m3 \cdot x)$$

|                | Value      | Error     |
|----------------|------------|-----------|
| m1             | -0.0023401 | 0.044102  |
| m2             | 0.93622    | 0.045359  |
| m3             | 0.005804   | 0.0012469 |
| Chisq          | 0.029583   | NA        |
| R <sup>2</sup> | 0.96454    | NA        |

$$y = m1 + m2 \cdot \exp(-m3 \cdot x)$$

|                | Value    | Error     |
|----------------|----------|-----------|
| m1             | 0.021355 | 0.069473  |
| m2             | 0.90168  | 0.071363  |
| m3             | 0.026772 | 0.0044911 |
| Chisq          | 0.078263 | NA        |
| R <sup>2</sup> | 0.93203  | NA        |

$$y = m1 + m2 \cdot \exp(-m3 \cdot x)$$

|                | Value   | Error    |
|----------------|---------|----------|
| m1             | 0.19635 | 0.057373 |
| m2             | 0.69776 | 0.068462 |
| m3             | 0.14572 | 0.039502 |
| Chisq          | 0.18326 | NA       |
| R <sup>2</sup> | 0.86864 | NA       |

$$y = m1 + m2 \cdot \exp(-m3 \cdot x)$$

|                | Value     | Error     |
|----------------|-----------|-----------|
| m1             | -0.83266  | 1.9375    |
| m2             | 1.8234    | 1.9318    |
| m3             | 0.0007719 | 0.0012492 |
| Chisq          | 0.01729   | NA        |
| R <sup>2</sup> | 0.98129   | NA        |

# MegaTev-wt all native cleavage motif

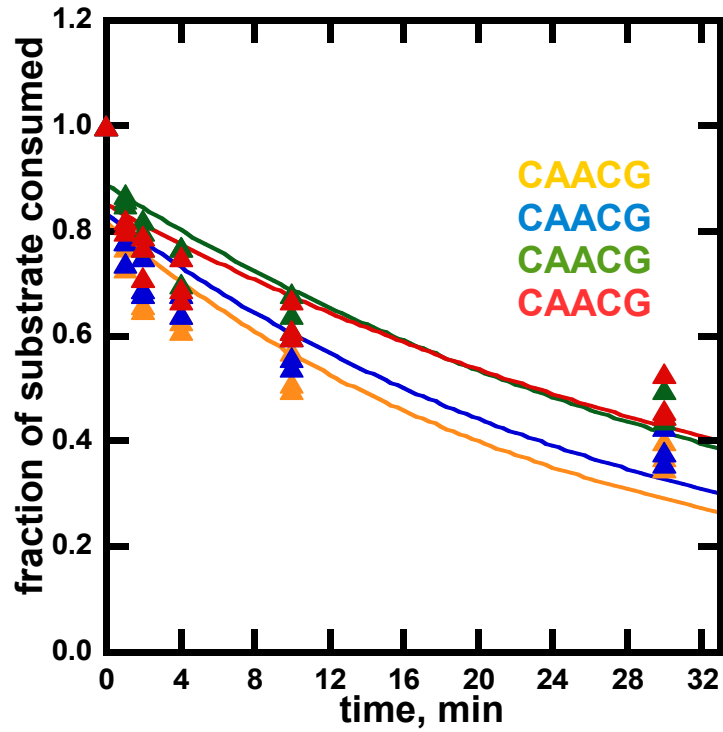

| y = m1 + m2*exp(-m3*x) |          |          |
|------------------------|----------|----------|
|                        | Value    | Error    |
| m1                     | 0.07577  | 0.10316  |
| m2                     | 0.74065  | 0.10387  |
| m3                     | 0.041234 | 0.013189 |
| Chisq                  | 0.18353  | NA       |
| R <sup>2</sup>         | 0.83169  | NA       |

| y = m1 + m2*exp(-m3*x) |          |          |
|------------------------|----------|----------|
|                        | Value    | Error    |
| m1                     | 0.043316 | 0.09368  |
| m2                     | 0.78877  | 0.095292 |
| m3                     | 0.034003 | 0.008919 |
| Chisq                  | 0.14544  | NA       |
| R <sup>2</sup>         | 0.86461  | NA       |

| y = m1 + m2*exp(-m3*x) |          |           |
|------------------------|----------|-----------|
|                        | Value    | Error     |
| m1                     | 0.021023 | 0.068464  |
| m2                     | 0.86658  | 0.070383  |
| m3                     | 0.02613  | 0.0044984 |
| Chisq                  | 0.075911 | NA        |
| R <sup>2</sup>         | 0.92808  | NA        |

| y = m1 + m2*exp(-m3*x) |          |           |
|------------------------|----------|-----------|
|                        | Value    | Error     |
| m1                     | 0.020292 | 0.087175  |
| m2                     | 0.82963  | 0.089878  |
| m3                     | 0.02368  | 0.0054637 |
| Chisq                  | 0.12258  | NA        |
| R <sup>2</sup>         | 0.87487  | NA        |

# MegaTev-wt native cleavage motif (CAACG) with cleavage motif knockouts (AAACA)

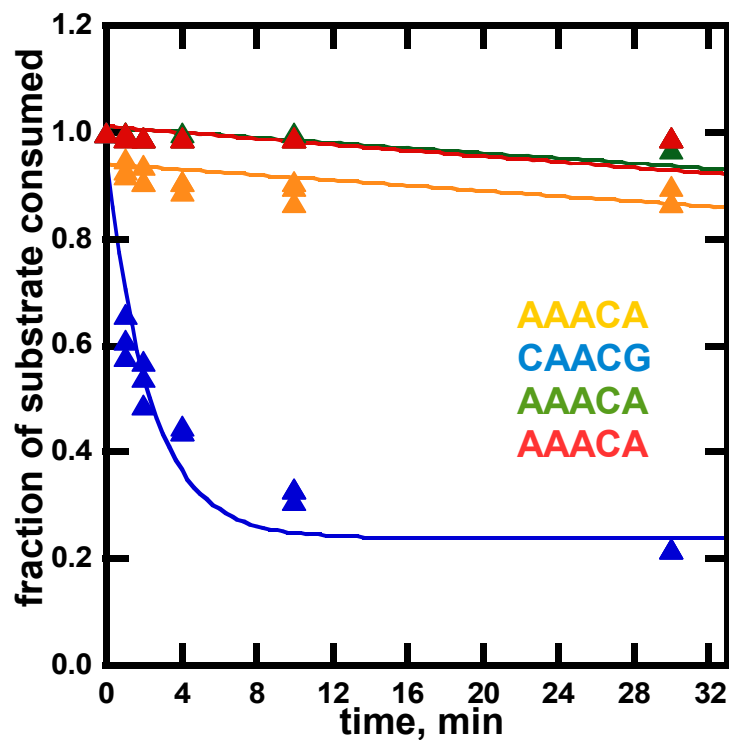

$$y = m1 + m2 \cdot \exp(-m3 \cdot x)$$

|                | Value     | Error     |
|----------------|-----------|-----------|
| m1             | -0.08168  | 0.10239   |
| m2             | 1.023     | 0.097575  |
| m3             | 0.0025263 | 0.0010328 |
| Chisq          | 0.018352  | NA        |
| R <sup>2</sup> | 0.97802   | NA        |

$$y = m1 + m2 \cdot \exp(-m3 \cdot x)$$

|                | Value   | Error    |
|----------------|---------|----------|
| m1             | 0.23975 | 0.035082 |
| m2             | 0.71427 | 0.057289 |
| m3             | 0.43028 | 0.081452 |
| Chisq          | 0.12873 | NA       |
| R <sup>2</sup> | 0.90732 | NA       |

$$y = m1 + m2 \cdot \exp(-m3 \cdot x)$$

|                | Value     | Error      |
|----------------|-----------|------------|
| m1             | -0.074901 | 0.094063   |
| m2             | 1.0856    | 0.090377   |
| m3             | 0.0023075 | 0.00073045 |
| Chisq          | 0.0095144 | NA         |
| R <sup>2</sup> | 0.98982   | NA         |

$$y = m1 + m2 \cdot \exp(-m3 \cdot x)$$

|                | Value       | Error      |
|----------------|-------------|------------|
| m1             | -0.00024741 | 0.073951   |
| m2             | 1.0118      | 0.069863   |
| m3             | 0.0028234   | 0.00096084 |
| Chisq          | 0.01698     | NA         |
| R <sup>2</sup> | 0.9818      | NA         |



# MegaTev WT

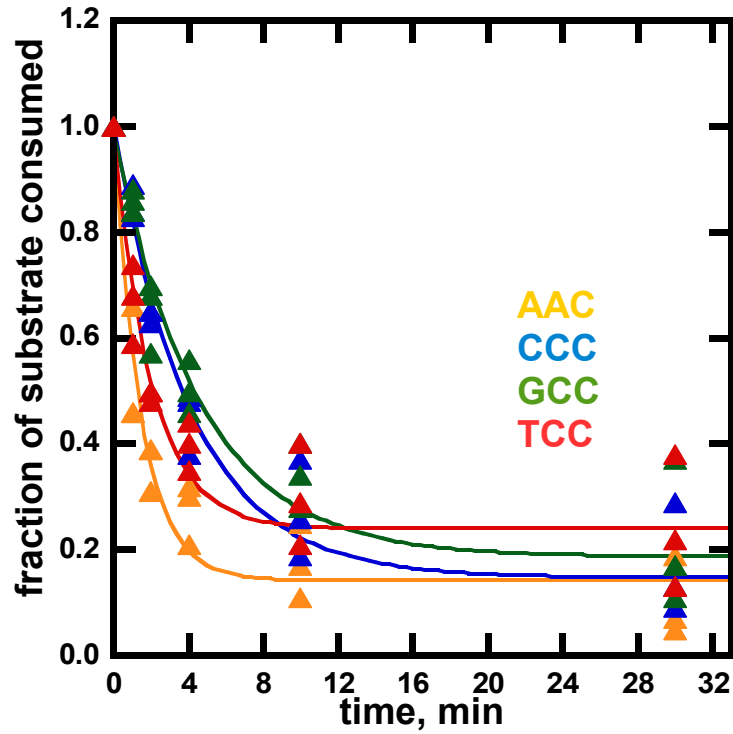

| y = m1 + m2*exp(-m3*x) |         |          |
|------------------------|---------|----------|
|                        | Value   | Error    |
| m1                     | 0.14201 | 0.02975  |
| m2                     | 0.84122 | 0.05419  |
| m3                     | 0.67307 | 0.099882 |
| Chisq                  | 0.11209 | NA       |
| R <sup>2</sup>         | 0.93797 | NA       |

| y = m1 + m2*exp(-m3*x) |          |          |
|------------------------|----------|----------|
|                        | Value    | Error    |
| m1                     | 0.14767  | 0.033756 |
| m2                     | 0.85608  | 0.046325 |
| m3                     | 0.24277  | 0.034368 |
| Chisq                  | 0.087235 | NA       |
| R <sup>2</sup>         | 0.95525  | NA       |

| y = m1 + m2*exp(-m3*x) |         |          |
|------------------------|---------|----------|
|                        | Value   | Error    |
| m1                     | 0.18691 | 0.041073 |
| m2                     | 0.80187 | 0.054721 |
| m3                     | 0.21868 | 0.039548 |
| Chisq                  | 0.12173 | NA       |
| R <sup>2</sup>         | 0.93067 | NA       |

| y = m1 + m2*exp(-m3*x) |         |          |
|------------------------|---------|----------|
|                        | Value   | Error    |
| m1                     | 0.239   | 0.036179 |
| m2                     | 0.74429 | 0.061169 |
| m3                     | 0.49021 | 0.093605 |
| Chisq                  | 0.14536 | NA       |
| R <sup>2</sup>         | 0.90313 | NA       |

# MegaTev WT

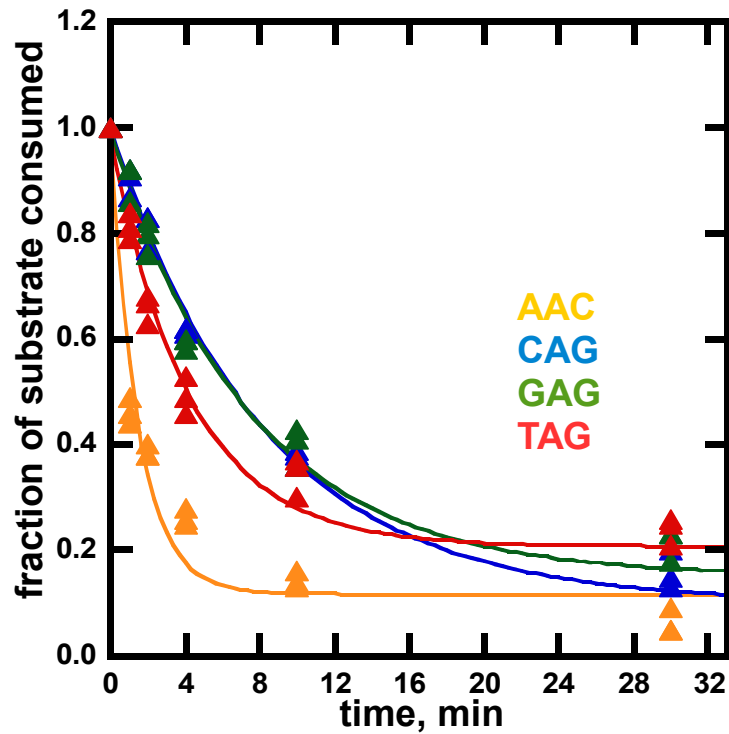

| y = m1 + m2*exp(-m3*x) |          |          |
|------------------------|----------|----------|
|                        | Value    | Error    |
| m1                     | 0.11701  | 0.025886 |
| m2                     | 0.85295  | 0.047014 |
| m3                     | 0.66413  | 0.084288 |
| Chisq                  | 0.084412 | NA       |
| R <sup>2</sup>         | 0.95383  | NA       |

| y = m1 + m2*exp(-m3*x) |          |          |
|------------------------|----------|----------|
|                        | Value    | Error    |
| m1                     | 0.10068  | 0.022984 |
| m2                     | 0.89553  | 0.026015 |
| m3                     | 0.12217  | 0.01004  |
| Chisq                  | 0.025187 | NA       |
| R <sup>2</sup>         | 0.98727  | NA       |

| y = m1 + m2*exp(-m3*x) |         |          |
|------------------------|---------|----------|
|                        | Value   | Error    |
| m1                     | 0.15049 | 0.03067  |
| m2                     | 0.84128 | 0.035722 |
| m3                     | 0.13419 | 0.015913 |
| Chisq                  | 0.04893 | NA       |
| R <sup>2</sup>         | 0.97274 | NA       |

| y = m1 + m2*exp(-m3*x) |          |          |
|------------------------|----------|----------|
|                        | Value    | Error    |
| m1                     | 0.20748  | 0.03086  |
| m2                     | 0.7723   | 0.042036 |
| m3                     | 0.23658  | 0.033806 |
| Chisq                  | 0.071851 | NA       |
| R <sup>2</sup>         | 0.95475  | NA       |

# MegaTev WT

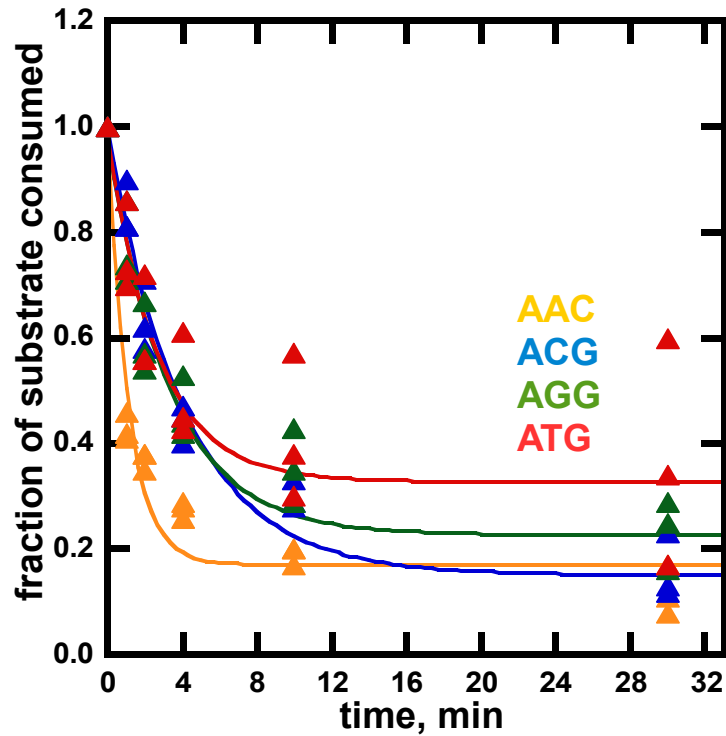

$$y = m1 + m2 \cdot \exp(-m3 \cdot x)$$

|                | Value    | Error    |
|----------------|----------|----------|
| m1             | 0.17076  | 0.025901 |
| m2             | 0.81166  | 0.05005  |
| m3             | 0.88978  | 0.12998  |
| Chisq          | 0.094888 | NA       |
| R <sup>2</sup> | 0.94269  | NA       |

$$y = m1 + m2 \cdot \exp(-m3 \cdot x)$$

|                | Value    | Error    |
|----------------|----------|----------|
| m1             | 0.1513   | 0.031024 |
| m2             | 0.84433  | 0.042612 |
| m3             | 0.24347  | 0.032132 |
| Chisq          | 0.073807 | NA       |
| R <sup>2</sup> | 0.96085  | NA       |

$$y = m1 + m2 \cdot \exp(-m3 \cdot x)$$

|                | Value   | Error    |
|----------------|---------|----------|
| m1             | 0.22778 | 0.039305 |
| m2             | 0.74662 | 0.057484 |
| m3             | 0.29907 | 0.058163 |
| Chisq          | 0.1332  | NA       |
| R <sup>2</sup> | 0.9136  | NA       |

$$y = m1 + m2 \cdot \exp(-m3 \cdot x)$$

|                | Value   | Error    |
|----------------|---------|----------|
| m1             | 0.32826 | 0.057119 |
| m2             | 0.65444 | 0.089381 |
| m3             | 0.37157 | 0.12279  |
| Chisq          | 0.317   | NA       |
| R <sup>2</sup> | 0.7713  | NA       |

# MegaTev WT

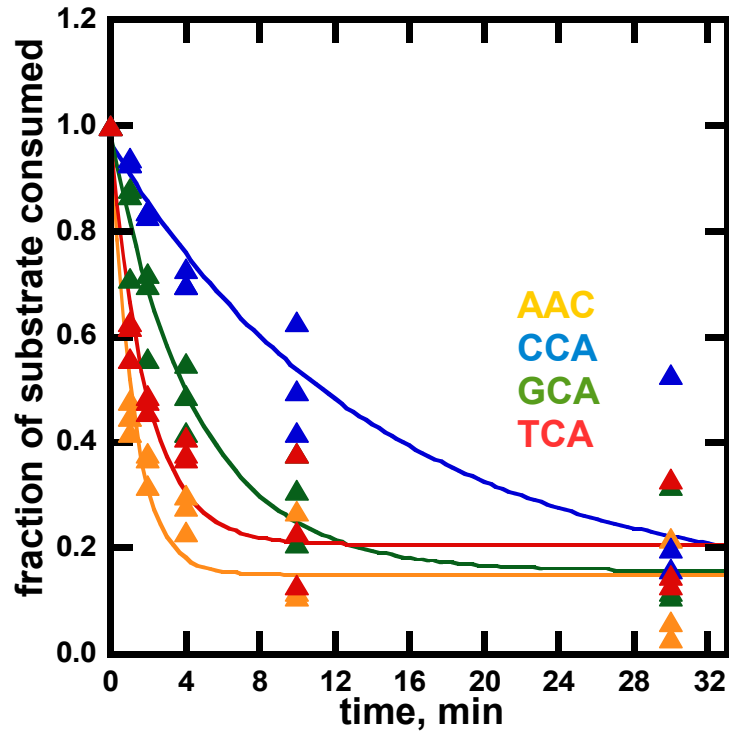

$$y = m1 + m2 \cdot \exp(-m3 \cdot x)$$

|                | Value   | Error    |
|----------------|---------|----------|
| m1             | 0.15014 | 0.029297 |
| m2             | 0.83121 | 0.055573 |
| m3             | 0.81304 | 0.12709  |
| Chisq          | 0.11718 | NA       |
| R <sup>2</sup> | 0.93335 | NA       |

$$y = m1 + m2 \cdot \exp(-m3 \cdot x)$$

|                | Value    | Error    |
|----------------|----------|----------|
| m1             | 0.12332  | 0.077646 |
| m2             | 0.84423  | 0.077491 |
| m3             | 0.071139 | 0.01816  |
| Chisq          | 0.15137  | NA       |
| R <sup>2</sup> | 0.90908  | NA       |

$$y = m1 + m2 \cdot \exp(-m3 \cdot x)$$

|                | Value   | Error    |
|----------------|---------|----------|
| m1             | 0.15762 | 0.041192 |
| m2             | 0.82483 | 0.054986 |
| m3             | 0.22022 | 0.038875 |
| Chisq          | 0.12292 | NA       |
| R <sup>2</sup> | 0.93362 | NA       |

$$y = m1 + m2 \cdot \exp(-m3 \cdot x)$$

|                | Value   | Error    |
|----------------|---------|----------|
| m1             | 0.20708 | 0.035308 |
| m2             | 0.76246 | 0.060171 |
| m3             | 0.50581 | 0.092492 |
| Chisq          | 0.14036 | NA       |
| R <sup>2</sup> | 0.90999 | NA       |

# MegaTev WT

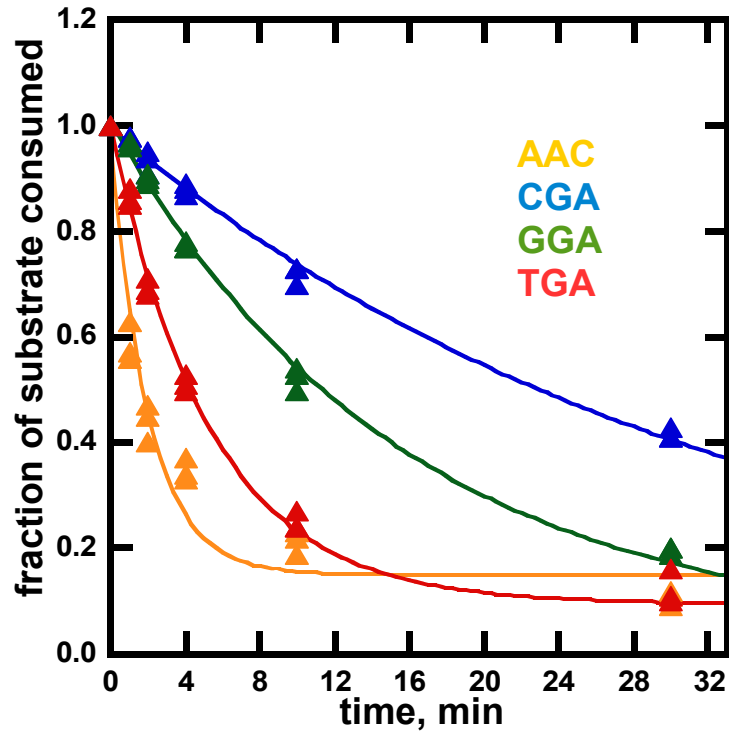

$$y = m1 + m2 \cdot \exp(-m3 \cdot x)$$

|                | Value    | Error    |
|----------------|----------|----------|
| m1             | 0.15012  | 0.027135 |
| m2             | 0.81742  | 0.045927 |
| m3             | 0.49223  | 0.064232 |
| Chisq          | 0.081922 | NA       |
| R <sup>2</sup> | 0.95226  | NA       |

$$y = m1 + m2 \cdot \exp(-m3 \cdot x)$$

|                | Value     | Error     |
|----------------|-----------|-----------|
| m1             | 0.0057274 | 0.015214  |
| m2             | 0.98982   | 0.015558  |
| m3             | 0.030225  | 0.0010138 |
| Chisq          | 0.0037855 | NA        |
| R <sup>2</sup> | 0.99725   | NA        |

$$y = m1 + m2 \cdot \exp(-m3 \cdot x)$$

|                | Value     | Error     |
|----------------|-----------|-----------|
| m1             | 0.033684  | 0.017569  |
| m2             | 0.9748    | 0.01744   |
| m3             | 0.065007  | 0.0031449 |
| Chisq          | 0.0070366 | NA        |
| R <sup>2</sup> | 0.9964    | NA        |

$$y = m1 + m2 \cdot \exp(-m3 \cdot x)$$

|                | Value    | Error    |
|----------------|----------|----------|
| m1             | 0.095313 | 0.016786 |
| m2             | 0.90434  | 0.021486 |
| m3             | 0.18847  | 0.012042 |
| Chisq          | 0.018656 | NA       |
| R <sup>2</sup> | 0.99107  | NA       |

# MegaTev WT

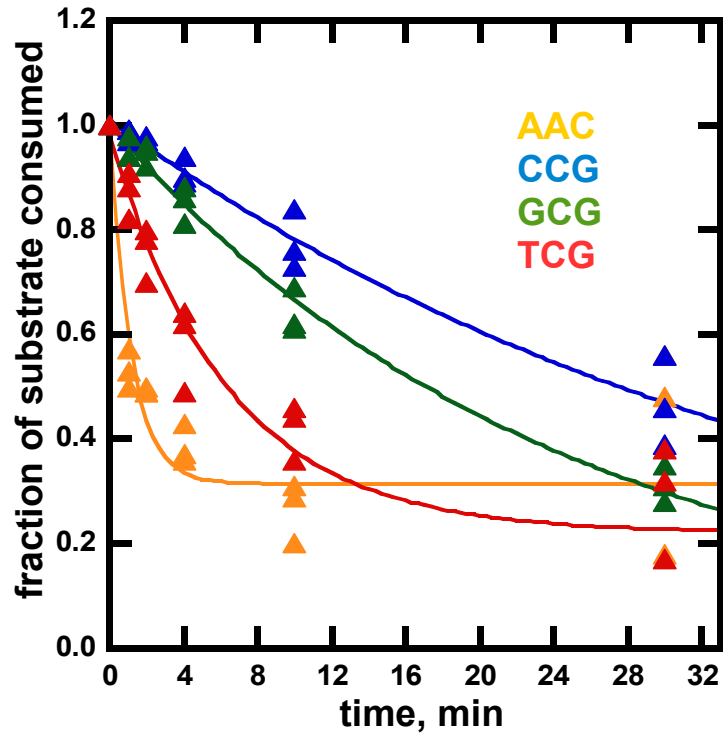

$$y = m1 + m2 \cdot \exp(-m3 \cdot x)$$

|                | Value   | Error    |
|----------------|---------|----------|
| m1             | 0.3142  | 0.042775 |
| m2             | 0.67043 | 0.082057 |
| m3             | 0.8585  | 0.2475   |
| Chisq          | 0.2552  | NA       |
| R <sup>2</sup> | 0.80681 | NA       |

$$y = m1 + m2 \cdot \exp(-m3 \cdot x)$$

|                | Value      | Error     |
|----------------|------------|-----------|
| m1             | 0.00019529 | 0.038219  |
| m2             | 1.0081     | 0.039319  |
| m3             | 0.02552    | 0.0021108 |
| Chisq          | 0.023629   | NA        |
| R <sup>2</sup> | 0.98229    | NA        |

$$y = m1 + m2 \cdot \exp(-m3 \cdot x)$$

|                | Value    | Error     |
|----------------|----------|-----------|
| m1             | 0.011763 | 0.029633  |
| m2             | 0.98879  | 0.029831  |
| m3             | 0.041364 | 0.0028489 |
| Chisq          | 0.015156 | NA        |
| R <sup>2</sup> | 0.99073  | NA        |

$$y = m1 + m2 \cdot \exp(-m3 \cdot x)$$

|                | Value   | Error    |
|----------------|---------|----------|
| m1             | 0.22088 | 0.045965 |
| m2             | 0.75836 | 0.05612  |
| m3             | 0.15805 | 0.032006 |
| Chisq          | 0.12492 | NA       |
| R <sup>2</sup> | 0.92027 | NA       |

# MegaTev WT

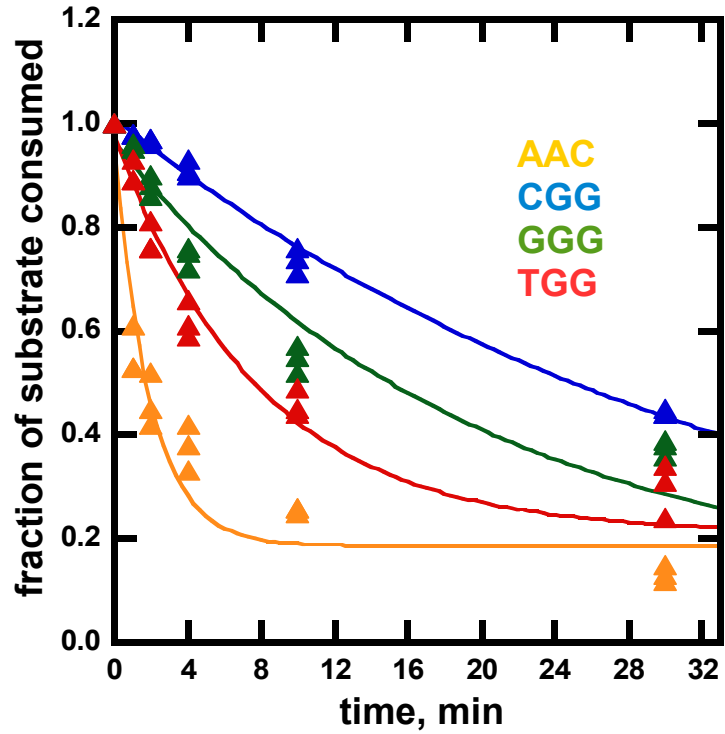

$$y = m1 + m2 \cdot \exp(-m3 \cdot x)$$

|                | Value   | Error    |
|----------------|---------|----------|
| m1             | 0.18593 | 0.033205 |
| m2             | 0.7743  | 0.05698  |
| m3             | 0.52013 | 0.088507 |
| Chisq          | 0.12564 | NA       |
| R <sup>2</sup> | 0.92078 | NA       |

$$y = m1 + m2 \cdot \exp(-m3 \cdot x)$$

|                | Value     | Error     |
|----------------|-----------|-----------|
| m1             | 0.0035108 | 0.017768  |
| m2             | 1.005     | 0.018217  |
| m3             | 0.028239  | 0.0010867 |
| Chisq          | 0.0051357 | NA        |
| R <sup>2</sup> | 0.99626   | NA        |

$$y = m1 + m2 \cdot \exp(-m3 \cdot x)$$

|                | Value    | Error     |
|----------------|----------|-----------|
| m1             | 0.10098  | 0.061738  |
| m2             | 0.86247  | 0.061448  |
| m3             | 0.051319 | 0.0090285 |
| Chisq          | 0.072088 | NA        |
| R <sup>2</sup> | 0.95014  | NA        |

$$y = m1 + m2 \cdot \exp(-m3 \cdot x)$$

|                | Value    | Error    |
|----------------|----------|----------|
| m1             | 0.21076  | 0.041804 |
| m2             | 0.76616  | 0.048001 |
| m3             | 0.12803  | 0.022546 |
| Chisq          | 0.087138 | NA       |
| R <sup>2</sup> | 0.94292  | NA       |

# MegaTev WT

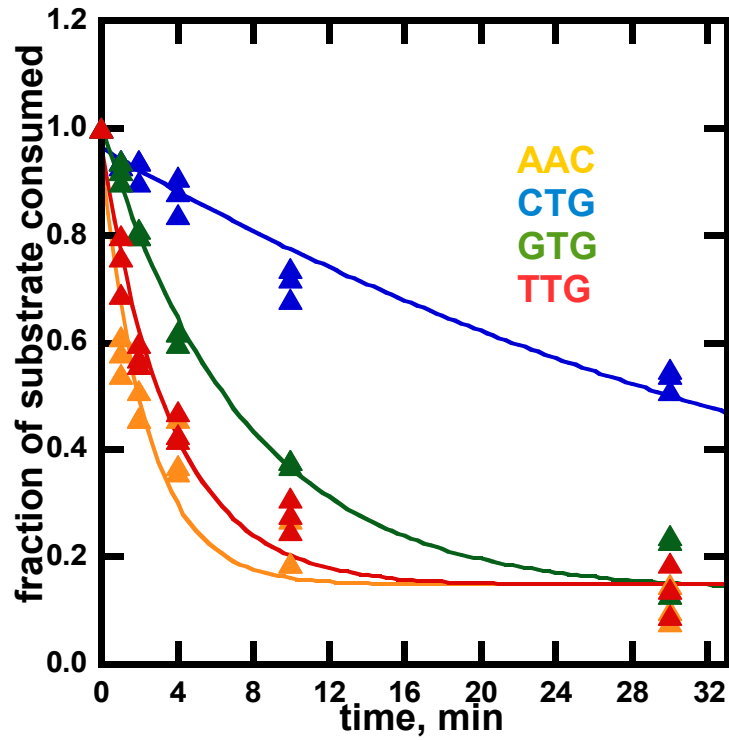

$$y = m1 + m2 \cdot \exp(-m3 \cdot x)$$

|                | Value   | Error    |
|----------------|---------|----------|
| m1             | 0.14855 | 0.034145 |
| m2             | 0.79704 | 0.055179 |
| m3             | 0.41458 | 0.068126 |
| Chisq          | 0.11977 | NA       |
| R <sup>2</sup> | 0.92927 | NA       |

$$y = m1 + m2 \cdot \exp(-m3 \cdot x)$$

|                | Value    | Error     |
|----------------|----------|-----------|
| m1             | 0.010031 | 0.039388  |
| m2             | 0.95277  | 0.040679  |
| m3             | 0.022104 | 0.0020256 |
| Chisq          | 0.024974 | NA        |
| R <sup>2</sup> | 0.97772  | NA        |

$$y = m1 + m2 \cdot \exp(-m3 \cdot x)$$

|                | Value    | Error    |
|----------------|----------|----------|
| m1             | 0.1354   | 0.02761  |
| m2             | 0.8699   | 0.032067 |
| m3             | 0.13294  | 0.013704 |
| Chisq          | 0.039329 | NA       |
| R <sup>2</sup> | 0.97934  | NA       |

$$y = m1 + m2 \cdot \exp(-m3 \cdot x)$$

|                | Value    | Error    |
|----------------|----------|----------|
| m1             | 0.14768  | 0.028834 |
| m2             | 0.81814  | 0.040867 |
| m3             | 0.27036  | 0.034747 |
| Chisq          | 0.067673 | NA       |
| R <sup>2</sup> | 0.96166  | NA       |



# MegaTev WT

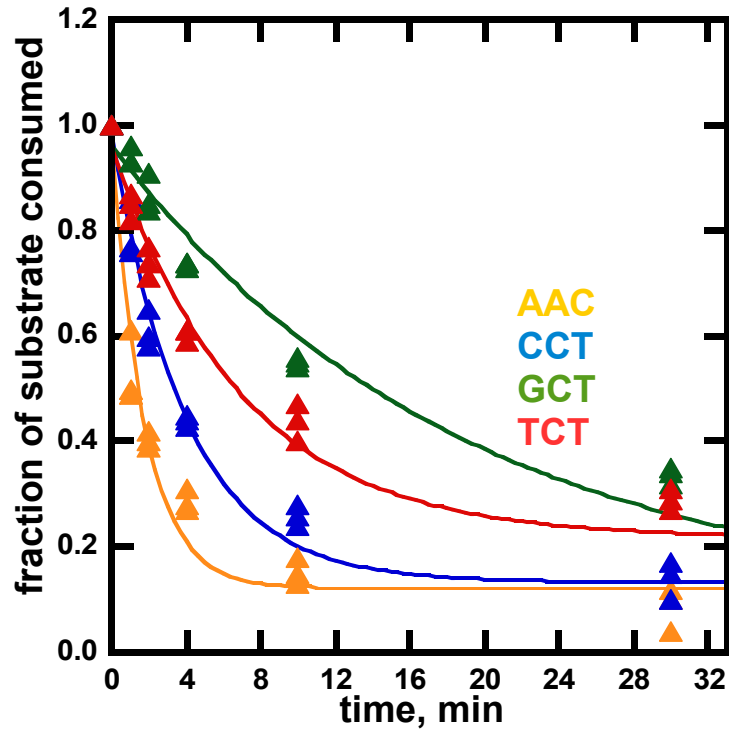

| y = m1 + m2*exp(-m3*x) |          |          |
|------------------------|----------|----------|
|                        | Value    | Error    |
| m1                     | 0.12159  | 0.024517 |
| m2                     | 0.85047  | 0.043007 |
| m3                     | 0.57     | 0.066354 |
| Chisq                  | 0.071175 | NA       |
| R <sup>2</sup>         | 0.96093  | NA       |

| y = m1 + m2*exp(-m3*x) |          |          |
|------------------------|----------|----------|
|                        | Value    | Error    |
| m1                     | 0.133    | 0.024072 |
| m2                     | 0.85039  | 0.033399 |
| m3                     | 0.25199  | 0.025753 |
| Chisq                  | 0.045309 | NA       |
| R <sup>2</sup>         | 0.97592  | NA       |

| y = m1 + m2*exp(-m3*x) |          |           |
|------------------------|----------|-----------|
|                        | Value    | Error     |
| m1                     | 0.089635 | 0.051243  |
| m2                     | 0.87149  | 0.050904  |
| m3                     | 0.053977 | 0.0079434 |
| Chisq                  | 0.051253 | NA        |
| R <sup>2</sup>         | 0.96555  | NA        |

| y = m1 + m2*exp(-m3*x) |          |          |
|------------------------|----------|----------|
|                        | Value    | Error    |
| m1                     | 0.21703  | 0.038829 |
| m2                     | 0.74145  | 0.046168 |
| m3                     | 0.14392  | 0.024798 |
| Chisq                  | 0.083126 | NA       |
| R <sup>2</sup>         | 0.94267  | NA       |

# MegaTev T3

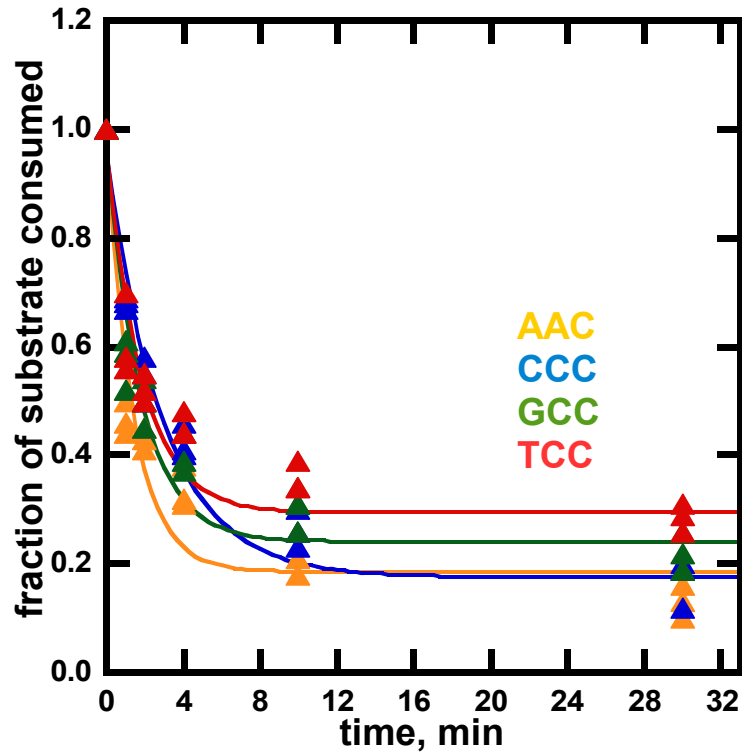

$$y = m1 + m2 \cdot \exp(-m3 \cdot x)$$

|                | Value   | Error    |
|----------------|---------|----------|
| m1             | 0.18568 | 0.032297 |
| m2             | 0.78242 | 0.059493 |
| m3             | 0.70846 | 0.1244   |
| Chisq          | 0.13483 | NA       |
| R <sup>2</sup> | 0.91558 | NA       |

$$y = m1 + m2 \cdot \exp(-m3 \cdot x)$$

|                | Value    | Error    |
|----------------|----------|----------|
| m1             | 0.17563  | 0.028764 |
| m2             | 0.78501  | 0.043822 |
| m3             | 0.3406   | 0.046798 |
| Chisq          | 0.076716 | NA       |
| R <sup>2</sup> | 0.95274  | NA       |

$$y = m1 + m2 \cdot \exp(-m3 \cdot x)$$

|                | Value   | Error    |
|----------------|---------|----------|
| m1             | 0.24054 | 0.032847 |
| m2             | 0.72589 | 0.057262 |
| m3             | 0.55522 | 0.10092  |
| Chisq          | 0.12637 | NA       |
| R <sup>2</sup> | 0.90998 | NA       |

$$y = m1 + m2 \cdot \exp(-m3 \cdot x)$$

|                | Value   | Error    |
|----------------|---------|----------|
| m1             | 0.29363 | 0.03632  |
| m2             | 0.67502 | 0.063011 |
| m3             | 0.54408 | 0.11713  |
| Chisq          | 0.15321 | NA       |
| R <sup>2</sup> | 0.87836 | NA       |

# MegaTev T3

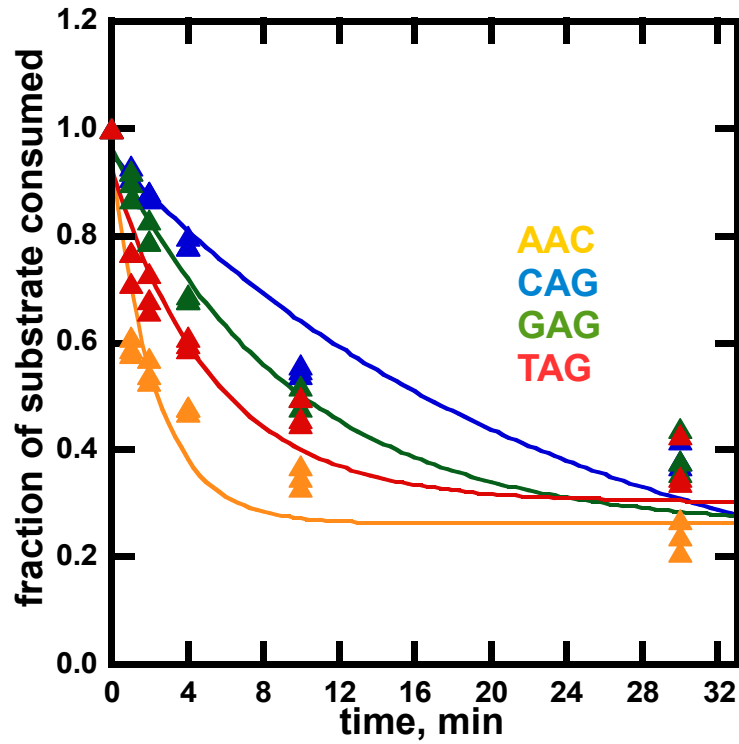

| y = m1 + m2*exp(-m3*x) |         |          |
|------------------------|---------|----------|
|                        | Value   | Error    |
| m1                     | 0.26354 | 0.039756 |
| m2                     | 0.68007 | 0.065004 |
| m3                     | 0.43228 | 0.097454 |
| Chisq                  | 0.16568 | NA       |
| R <sup>2</sup>         | 0.87332 | NA       |

| y = m1 + m2*exp(-m3*x) |          |           |
|------------------------|----------|-----------|
|                        | Value    | Error     |
| m1                     | 0.070783 | 0.058586  |
| m2                     | 0.87961  | 0.05881   |
| m3                     | 0.043503 | 0.0067517 |
| Chisq                  | 0.060197 | NA        |
| R <sup>2</sup>         | 0.95623  | NA        |

| y = m1 + m2*exp(-m3*x) |         |          |
|------------------------|---------|----------|
|                        | Value   | Error    |
| m1                     | 0.25536 | 0.053611 |
| m2                     | 0.70786 | 0.057997 |
| m3                     | 0.10538 | 0.024841 |
| Chisq                  | 0.11689 | NA       |
| R <sup>2</sup>         | 0.9105  | NA       |

| y = m1 + m2*exp(-m3*x) |         |          |
|------------------------|---------|----------|
|                        | Value   | Error    |
| m1                     | 0.30336 | 0.050709 |
| m2                     | 0.62114 | 0.064609 |
| m3                     | 0.18522 | 0.051896 |
| Chisq                  | 0.16848 | NA       |
| R <sup>2</sup>         | 0.85283 | NA       |

# MegaTev T3

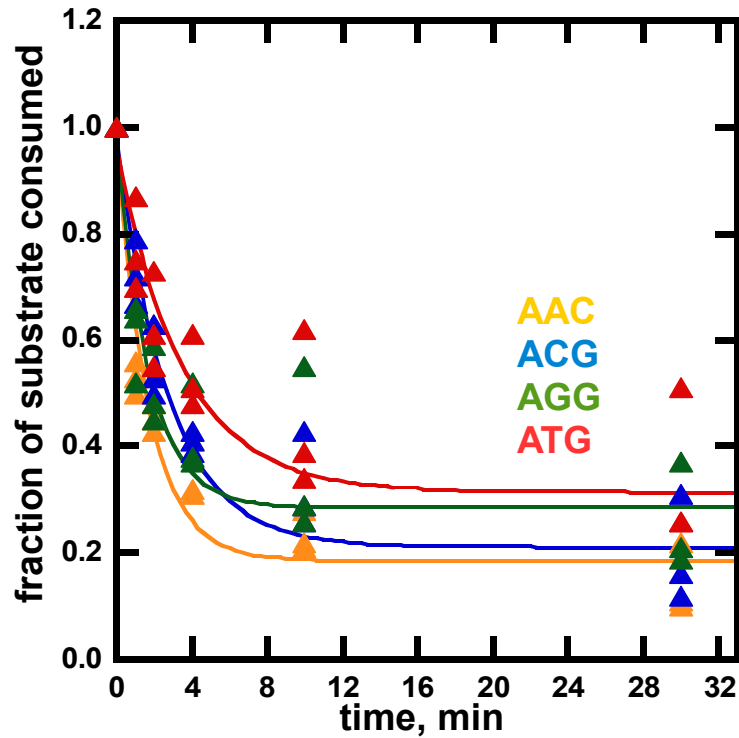

$$y = m1 + m2 \cdot \exp(-m3 \cdot x)$$

|                | Value   | Error    |
|----------------|---------|----------|
| m1             | 0.18553 | 0.031649 |
| m2             | 0.78049 | 0.055854 |
| m3             | 0.58499 | 0.096309 |
| Chisq          | 0.11988 | NA       |
| R <sup>2</sup> | 0.92468 | NA       |

$$y = m1 + m2 \cdot \exp(-m3 \cdot x)$$

|                | Value   | Error    |
|----------------|---------|----------|
| m1             | 0.21118 | 0.037158 |
| m2             | 0.76768 | 0.057677 |
| m3             | 0.36179 | 0.066108 |
| Chisq          | 0.13228 | NA       |
| R <sup>2</sup> | 0.91763 | NA       |

$$y = m1 + m2 \cdot \exp(-m3 \cdot x)$$

|                | Value   | Error    |
|----------------|---------|----------|
| m1             | 0.28452 | 0.044676 |
| m2             | 0.69017 | 0.078824 |
| m3             | 0.58434 | 0.15354  |
| Chisq          | 0.23876 | NA       |
| R <sup>2</sup> | 0.82818 | NA       |

$$y = m1 + m2 \cdot \exp(-m3 \cdot x)$$

|                | Value   | Error    |
|----------------|---------|----------|
| m1             | 0.31448 | 0.056782 |
| m2             | 0.64847 | 0.082154 |
| m3             | 0.28898 | 0.09308  |
| Chisq          | 0.27259 | NA       |
| R <sup>2</sup> | 0.79605 | NA       |

# MegaTev T3

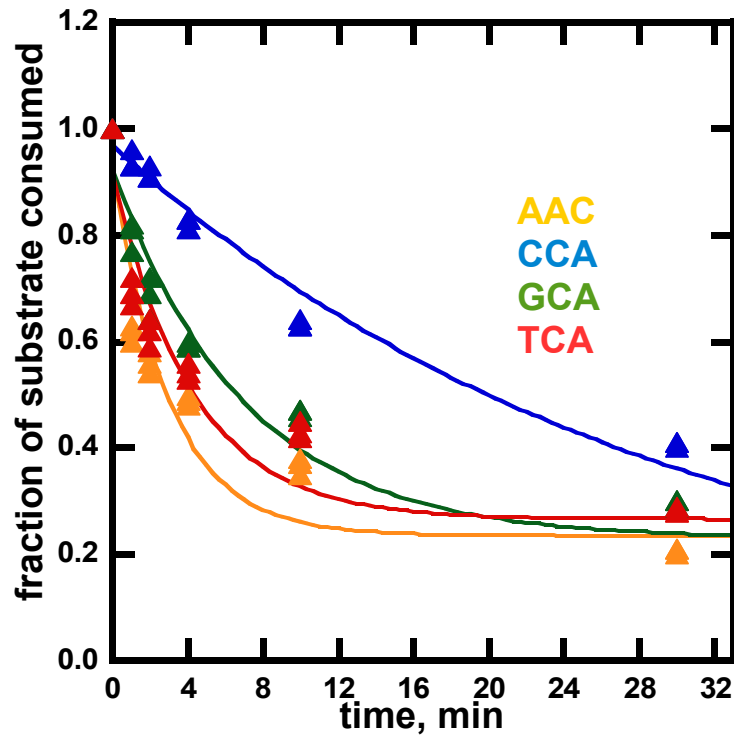

$$y = m1 + m2 \cdot \exp(-m3 \cdot x)$$

|                | Value   | Error    |
|----------------|---------|----------|
| m1             | 0.23545 | 0.042848 |
| m2             | 0.68952 | 0.064705 |
| m3             | 0.33111 | 0.076912 |
| Chisq          | 0.1676  | NA       |
| R <sup>2</sup> | 0.87702 | NA       |

$$y = m1 + m2 \cdot \exp(-m3 \cdot x)$$

|                | Value    | Error     |
|----------------|----------|-----------|
| m1             | 0.028584 | 0.038135  |
| m2             | 0.93933  | 0.03876   |
| m3             | 0.034577 | 0.0031078 |
| Chisq          | 0.02416  | NA        |
| R <sup>2</sup> | 0.98214  | NA        |

$$y = m1 + m2 \cdot \exp(-m3 \cdot x)$$

|                | Value   | Error    |
|----------------|---------|----------|
| m1             | 0.23002 | 0.046608 |
| m2             | 0.69364 | 0.055309 |
| m3             | 0.14295 | 0.031569 |
| Chisq          | 0.11913 | NA       |
| R <sup>2</sup> | 0.90937 | NA       |

$$y = m1 + m2 \cdot \exp(-m3 \cdot x)$$

|                | Value   | Error    |
|----------------|---------|----------|
| m1             | 0.26574 | 0.046533 |
| m2             | 0.65075 | 0.063308 |
| m3             | 0.23559 | 0.060202 |
| Chisq          | 0.16297 | NA       |
| R <sup>2</sup> | 0.86849 | NA       |

# MegaTev T3

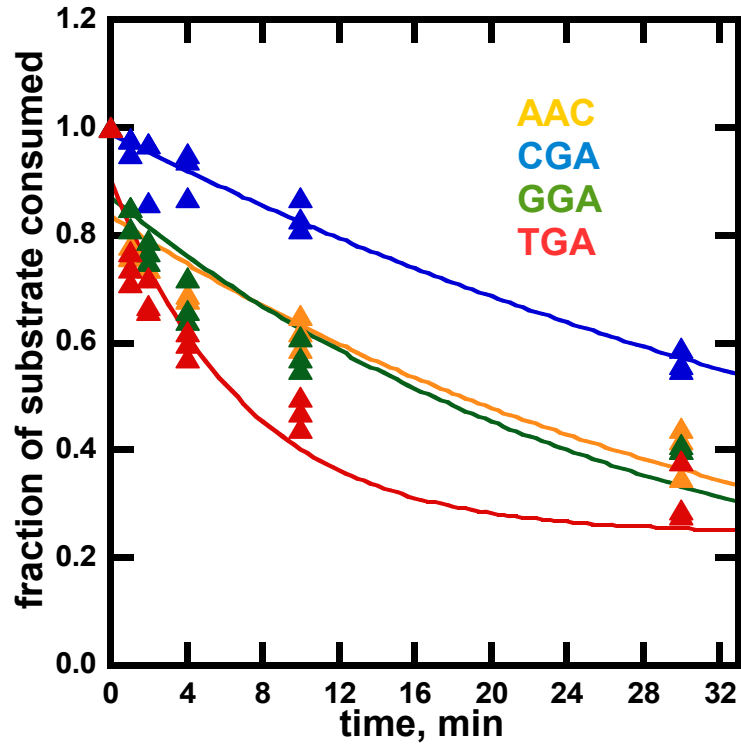

$$y = m1 + m2 \cdot \exp(-m3 \cdot x)$$

|                | Value    | Error    |
|----------------|----------|----------|
| m1             | 0.022858 | 0.090488 |
| m2             | 0.8126   | 0.092689 |
| m3             | 0.028951 | 0.007021 |
| Chisq          | 0.13344  | NA       |
| R <sup>2</sup> | 0.87169  | NA       |

$$y = m1 + m2 \cdot \exp(-m3 \cdot x)$$

|                | Value      | Error     |
|----------------|------------|-----------|
| m1             | -0.0007839 | 0.032888  |
| m2             | 0.98976    | 0.034091  |
| m3             | 0.018296   | 0.0014072 |
| Chisq          | 0.017355   | NA        |
| R <sup>2</sup> | 0.98442    | NA        |

$$y = m1 + m2 \cdot \exp(-m3 \cdot x)$$

|                | Value    | Error     |
|----------------|----------|-----------|
| m1             | 0.051123 | 0.081766  |
| m2             | 0.81852  | 0.082989  |
| m3             | 0.035549 | 0.0078975 |
| Chisq          | 0.11155  | NA        |
| R <sup>2</sup> | 0.90176  | NA        |

$$y = m1 + m2 \cdot \exp(-m3 \cdot x)$$

|                | Value   | Error    |
|----------------|---------|----------|
| m1             | 0.24591 | 0.052899 |
| m2             | 0.65601 | 0.062897 |
| m3             | 0.14392 | 0.038184 |
| Chisq          | 0.15428 | NA       |
| R <sup>2</sup> | 0.87397 | NA       |

# MegaTev T3

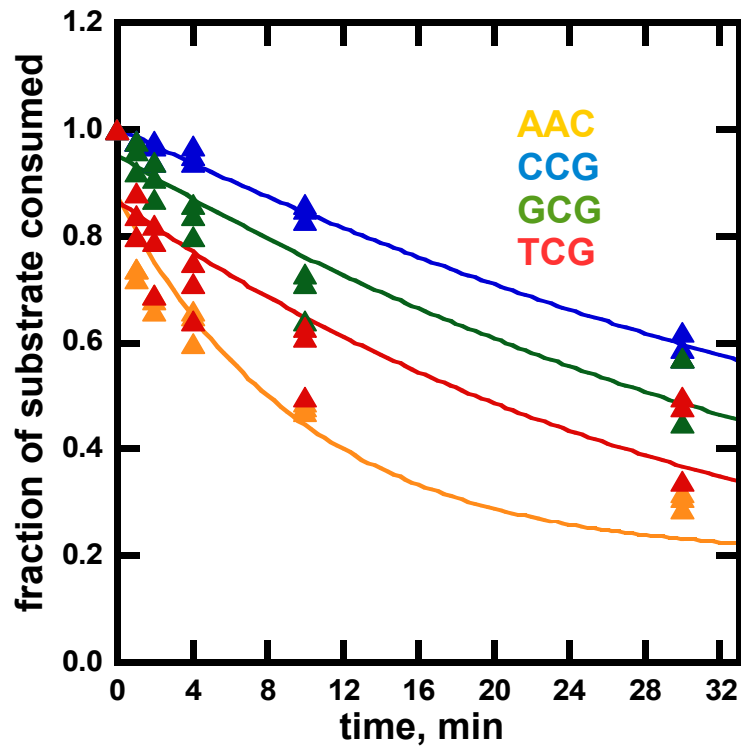

| y = m1 + m2*exp(-m3*x) |         |          |
|------------------------|---------|----------|
|                        | Value   | Error    |
| m1                     | 0.19969 | 0.061316 |
| m2                     | 0.6757  | 0.065513 |
| m3                     | 0.10098 | 0.028253 |
| Chisq                  | 0.1454  | NA       |
| R <sup>2</sup>         | 0.88075 | NA       |

| y = m1 + m2*exp(-m3*x) |             |            |
|------------------------|-------------|------------|
|                        | Value       | Error      |
| m1                     | -0.00086981 | 0.01629    |
| m2                     | 1.0044      | 0.0169     |
| m3                     | 0.01729     | 0.00066062 |
| Chisq                  | 0.0042551   | NA         |
| R <sup>2</sup>         | 0.99617     | NA         |

| y = m1 + m2*exp(-m3*x) |          |           |
|------------------------|----------|-----------|
|                        | Value    | Error     |
| m1                     | 0.014747 | 0.056873  |
| m2                     | 0.93773  | 0.058687  |
| m3                     | 0.022897 | 0.0030621 |
| Chisq                  | 0.052119 | NA        |
| R <sup>2</sup>         | 0.9539   | NA        |

| y = m1 + m2*exp(-m3*x) |          |           |
|------------------------|----------|-----------|
|                        | Value    | Error     |
| m1                     | 0.04064  | 0.095863  |
| m2                     | 0.82588  | 0.097957  |
| m3                     | 0.030748 | 0.0077972 |
| Chisq                  | 0.15053  | NA        |
| R <sup>2</sup>         | 0.86517  | NA        |

# MegaTev T3

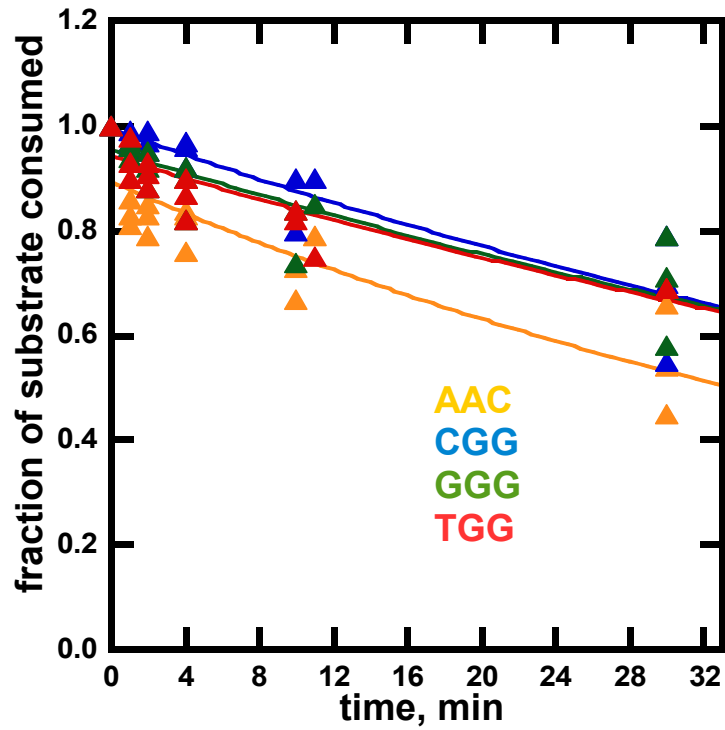

| y = m1 + m2*exp(-m3*x) |           |           |
|------------------------|-----------|-----------|
|                        | Value     | Error     |
| m1                     | 0.0047237 | 0.073381  |
| m2                     | 0.88854   | 0.076137  |
| m3                     | 0.01745   | 0.0033746 |
| Chisq                  | 0.086361  | NA        |
| R <sup>2</sup>         | 0.9096    | NA        |

| y = m1 + m2*exp(-m3*x) |            |           |
|------------------------|------------|-----------|
|                        | Value      | Error     |
| m1                     | 0.00013591 | 0.05      |
| m2                     | 0.99388    | 0.052043  |
| m3                     | 0.012709   | 0.0017131 |
| Chisq                  | 0.040022   | NA        |
| R <sup>2</sup>         | 0.96128    | NA        |

| y = m1 + m2*exp(-m3*x) |          |           |
|------------------------|----------|-----------|
|                        | Value    | Error     |
| m1                     | 0.002301 | 0.058519  |
| m2                     | 0.95134  | 0.060938  |
| m3                     | 0.011684 | 0.0020148 |
| Chisq                  | 0.054802 | NA        |
| R <sup>2</sup>         | 0.94228  | NA        |

| y = m1 + m2*exp(-m3*x) |           |           |
|------------------------|-----------|-----------|
|                        | Value     | Error     |
| m1                     | 0.0024041 | 0.043925  |
| m2                     | 0.94005   | 0.045744  |
| m3                     | 0.011544  | 0.0015225 |
| Chisq                  | 0.030875  | NA        |
| R <sup>2</sup>         | 0.96579   | NA        |



# MegaTev T3

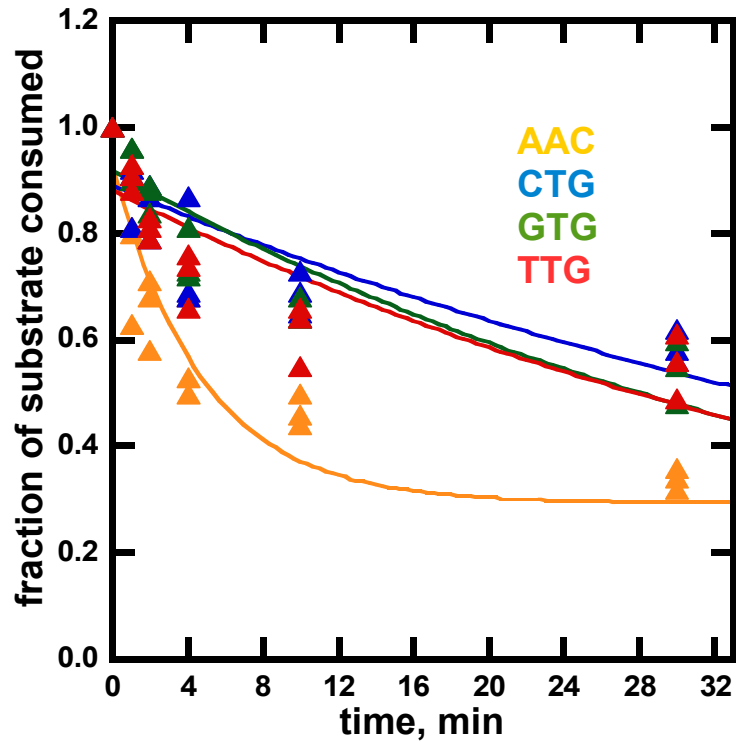

| y = m1 + m2*exp(-m3*x) |         |          |
|------------------------|---------|----------|
|                        | Value   | Error    |
| m1                     | 0.29406 | 0.054142 |
| m2                     | 0.63304 | 0.071237 |
| m3                     | 0.20892 | 0.062605 |
| Chisq                  | 0.20609 | NA       |
| R <sup>2</sup>         | 0.8316  | NA       |

| y = m1 + m2*exp(-m3*x) |          |           |
|------------------------|----------|-----------|
|                        | Value    | Error     |
| m1                     | 0.010419 | 0.085908  |
| m2                     | 0.87974  | 0.089146  |
| m3                     | 0.017002 | 0.0039337 |
| Chisq                  | 0.11833  | NA        |
| R <sup>2</sup>         | 0.87706  | NA        |

| y = m1 + m2*exp(-m3*x) |          |           |
|------------------------|----------|-----------|
|                        | Value    | Error     |
| m1                     | 0.021244 | 0.078845  |
| m2                     | 0.89637  | 0.08141   |
| m3                     | 0.022338 | 0.0043482 |
| Chisq                  | 0.1001   | NA        |
| R <sup>2</sup>         | 0.90685  | NA        |

| y = m1 + m2*exp(-m3*x) |          |           |
|------------------------|----------|-----------|
|                        | Value    | Error     |
| m1                     | 0.022697 | 0.095573  |
| m2                     | 0.85848  | 0.098812  |
| m3                     | 0.021067 | 0.0052439 |
| Chisq                  | 0.14688  | NA        |
| R <sup>2</sup>         | 0.8558   | NA        |

# MegaTev T3

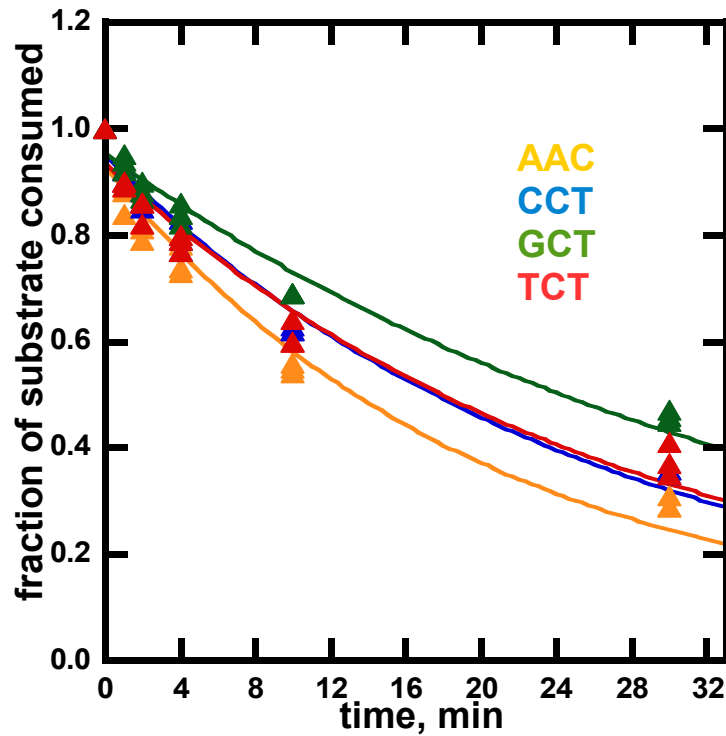

$$y = m1 + m2 \cdot \exp(-m3 \cdot x)$$

|                | Value    | Error     |
|----------------|----------|-----------|
| m1             | 0.058155 | 0.045283  |
| m2             | 0.87075  | 0.045081  |
| m3             | 0.051061 | 0.0065148 |
| Chisq          | 0.038671 | NA        |
| R <sup>2</sup> | 0.97306  | NA        |

$$y = m1 + m2 \cdot \exp(-m3 \cdot x)$$

|                | Value    | Error     |
|----------------|----------|-----------|
| m1             | 0.027782 | 0.035134  |
| m2             | 0.92215  | 0.035523  |
| m3             | 0.038233 | 0.0032855 |
| Chisq          | 0.020886 | NA        |
| R <sup>2</sup> | 0.98477  | NA        |

$$y = m1 + m2 \cdot \exp(-m3 \cdot x)$$

|                | Value    | Error     |
|----------------|----------|-----------|
| m1             | 0.013821 | 0.033711  |
| m2             | 0.94054  | 0.03461   |
| m3             | 0.027205 | 0.0021224 |
| Chisq          | 0.018444 | NA        |
| R <sup>2</sup> | 0.98457  | NA        |

$$y = m1 + m2 \cdot \exp(-m3 \cdot x)$$

|                | Value    | Error     |
|----------------|----------|-----------|
| m1             | 0.03217  | 0.044877  |
| m2             | 0.90261  | 0.045474  |
| m3             | 0.036701 | 0.0040815 |
| Chisq          | 0.033795 | NA        |
| R <sup>2</sup> | 0.97401  | NA        |

**S4 Fig. Correlation between relative flexibility of CNNNG sequences and relative cleavage activity.** Plot of the relative rate of cleavage ( $k_{rel}$ ) with cumulative flexibility of each cleavage motif (CNNNG) relative to the native sequence (CAACG). Cumulative flexibility was determined from the sum of TRX values (1) from each pair of adjacent bases in the each of the CNNNG cleavage motifs. The relative cleavage activity is taken from data shown in Fig. 4 and in S3 Fig.

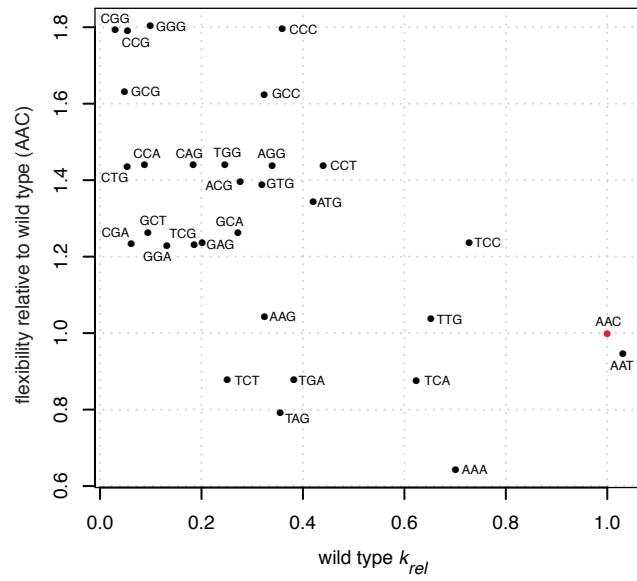

**Supplemental Table S1: Bacterial strains used in this study**

| Strains                                  | Description                                                                                                                                                                                                                                                                                                           | Source |
|------------------------------------------|-----------------------------------------------------------------------------------------------------------------------------------------------------------------------------------------------------------------------------------------------------------------------------------------------------------------------|--------|
| <i>E. coli</i> - NEB5 $\alpha$           | F <sup>-</sup> , $\phi$ 80d <i>lacZ</i> $\Delta$ M15, $\Delta$ ( <i>lacZYA-argF</i> )U169, <i>deoR</i> , <i>recA1</i> , <i>endA1</i> , <i>hsdR17</i> ( <i>rk<sup>-</sup></i> , <i>mk<sup>+</sup></i> ), <i>phoA</i> , <i>supE44</i> , $\lambda^-$ , <i>thi-1</i> , <i>gyrA96</i> , <i>relA1</i>                       | N.E.B. |
| <i>E. coli</i> - ER2566                  | F- $\lambda$ - <i>fhuA2</i> [lon] <i>ompT lacZ::T7</i> gene 1 <i>gal sulA11</i> $\Delta$ ( <i>mcrC-mrr</i> )114::IS10 R( <i>mcr-73::miniTn10-TetS</i> )2 R( <i>zgb-210::Tn10</i> )( <i>TetS</i> ) <i>endA1</i> [dcm]                                                                                                  | N.E.B. |
| <i>E. coli</i> - BW25141( $\lambda$ DE3) | F <sup>-</sup> <i>lacI<sup>A</sup></i> <i>rrmB</i> <sub>T14</sub> <i>DlacZ</i> <sub>WJ16</sub> <i>DphoBR580</i> <i>hsdR514</i> <i>DaraBAD</i> <sub>AH33</sub> <i>DrhaBAD</i> <sub>LD78</sub> <i>galU95</i> <i>endA</i> <sub>BT333</sub> <i>uidA</i> ( <i>DMlu</i> ): <i>pir+</i> <i>recA1</i> , $\lambda$ DE3 lysogen | Ref 34 |

**Supplemental Table S2: Plasmids used in this study**

| Plasmids                 | Description                                                                                                                                                                        | Source  |
|--------------------------|------------------------------------------------------------------------------------------------------------------------------------------------------------------------------------|---------|
| pACYCDuet-1(PciI)        | <i>ori</i> <sub>p15A</sub> , cm, pACYCDuet-1 with a PciI site substituted for the NcoI site                                                                                        | Novagen |
| p11-lacY-wtx1 (pTox)     | <i>ori</i> <sub>pBR322</sub> , amp                                                                                                                                                 | Ref 34  |
| pKox                     | <i>ori</i> <sub>pBR322</sub> , kan, pTox with kan <sup>r</sup> inserted into ScaI site of amp <sup>r</sup>                                                                         | Ref 34  |
| pSP72                    | <i>ori</i> <sub>pBR322</sub> , amp                                                                                                                                                 | Promega |
| pToxTO20                 | p11-lacY-wtx1, that contains a 42-bp hybrid I-TevI/I-OnuI E1 homing site ( <i>td</i> bases -27 to -8 fused to the I-OnuI E1 site) cloned into the XbaI and SphI sites(DE1064/1065) | Ref 34  |
| pToxTO20 C1A/G5A         | Similar to pToxTO20, with C1A and G5A substitution                                                                                                                                 | Ref 34  |
| pToxTO20 C1N/G5N         | Similar to pToxTO20, with either a C1 or G5 substitution                                                                                                                           | Ref 34  |
| pKoxTO20                 | Similar to pToxTO20, except derived from pKox                                                                                                                                      | Ref 34  |
| pKoxTO20 CNNNG           | Similar to pKoxTO20, with one of the triplet substitutions ( <i>e.g.</i> CCCGG)                                                                                                    | Ref 34  |
| pACYCOnuE1(E22Q)(+H)     | pACYCDuet-1(PciI), containing the I-OnuI E1 gene with a E22Q mutation cloned into the BamHI and XhoI sites                                                                         | Ref 34  |
| pTevN169-OnuE1(E22Q)(+H) | pACYCOnuE1(E22Q)(+H), with residues 1-N169 of I-TevI (DE) cloned into the PciI and BamHI sites (+6xHis)                                                                            | Ref 34  |

Supplemental Table S3: Oligonucleotides used in this study

| Name   | Sequence (5'-3')                                    | Notes <sup>1</sup>                                                                                              |
|--------|-----------------------------------------------------|-----------------------------------------------------------------------------------------------------------------|
| DE410  | GGAAGAAGTGGCTGATCTCAGC                              | Forward primer to generate all cycle-seq products for target sites cloned into pTox                             |
| DE411  | CAGACCGCTTCTGCGTTCTG                                | Reverse primer to generate all cycle-seq products for target sites cloned into pTox                             |
| DE840  | GCCGCCATGGGTA <sup>1</sup> AAAAGCGGAATTTATCAGATT    | Forward primer for MegaTev cloning, NcoI site underlined                                                        |
| DE1045 | CGCGGATCCATTTCTGCATTTACTACAAG                       | Reverse primer for TevN169 cloning, BamHI site underlined                                                       |
| DE1424 | CGTTTGGTGATACATGTTCTACG                             | Reverse primer for I-TevI linker cloning.                                                                       |
| DE1912 | CGTAGAACATGTATCACCAAACG                             | Reverse primer for mutagenesis of the I-TevI nuclease domain, PciI site is underlined                           |
| DE2054 | CTAGAAAACGCTCAGTAGATGTTTTGGTCCACATATTTAACCTTTTGCATG | Top strand of C1A substrate for insertion into pTox XbaI/SphI                                                   |
| DE2055 | CAAAGGTTAAATATGTGGACCAAACATCTACTGAGCGTTTT           | Bottom strand of C1A substrate for insertion into pTox XbaI/SphI                                                |
| DE2056 | CTAGATAACGCTCAGTAGATGTTTTGGTCCACATATTTAACCTTTTGCATG | Top strand of C1T substrate for insertion into pTox XbaI/SphI                                                   |
| DE2057 | CAAAGGTTAAATATGTGGACCAAACATCTACTGAGCGTTAT           | Bottom strand of C1T substrate for insertion into pTox XbaI/SphI                                                |
| DE2058 | CTAGACAACACTCAGTAGATGTTTTGGTCCACATATTTAACCTTTTGCATG | Top strand of G5A substrate for insertion into pTox XbaI/SphI                                                   |
| DE2059 | CAAAGGTTAAATATGTGGACCAAACATCTACTGAGTGTTGT           | Bottom strand of G5A substrate for insertion into pTox XbaI/SphI                                                |
| DE2060 | CTAGACAACCCTCAGTAGATGTTTTGGTCCACATATTTAACCTTTTGCATG | Top strand of G5C substrate for insertion into pTox XbaI/SphI                                                   |
| DE2061 | CAAAGGTTAAATATGTGGACCAAACATCTACTGAGGGTTGT           | Bottom strand of G5C substrate for insertion into pTox XbaI/SphI                                                |
| DE2222 | CCCAAACAGGTCGCTGAAATGC                              | Forward primer for generating the 2200 bp barcode assay substrate from pTox or pKox templates.                  |
| DE2223 | TGTCACGCTCGTCGTTTGGTATGGC                           | Reverse primer for generating the 2200 bp barcode assay substrate from pTox templates.                          |
| DE2224 | ATGACGACCGTAGTGATGAATCTCTCC                         | Forward primer for generating the 1900 bp barcode assay substrate from pTox or pKox templates.                  |
| DE2225 | TCATGGTTATGGCAGCACTGC                               | Reverse primer for generating the 1900 bp barcode assay substrate from pTox templates.                          |
| DE2226 | AAAAAATCGAGATAACCGTTGGC                             | Forward primer for generating the 1600 bp barcode assay substrate from pTox or pKox templates.                  |
| DE2227 | CCGCGCCACATAGCAGAACTTTAAAAGTGC                      | Reverse primer for generating the 1600 bp barcode assay substrate from pTox or pKox templates.                  |
| DE2228 | ATTGTCCATATTGCATCAGACATTGC                          | Forward primer for generating the 1300 bp barcode assay substrate from pTox or pKox templates.                  |
| DE2229 | ACTTCACCAGCGTTTCTGG                                 | Forward primer for generating the 1300 bp barcode assay substrate from pTox or pKox templates.                  |
| DE2230 | AAATTAATAGGTTGTATTGATGTTGGACGAGTCG                  | Reverse primer for generating the 2200 bp native I-TevI target barcode assay substrate from pKox templates.     |
| DE2231 | AAATTGCAGTTTCATTTGATGCTCG                           | Reverse primer for generating the 1900 bp native I-TevI target barcode assay substrate from pKox templates.     |
| DE2296 | TGAGACACAACGTGGCTTTGTTGAATAAATCG                    | Reverse primer for generating the 1900 bp non-native I-TevI target barcode assay substrate from pKox templates. |
| DE2297 | TCCATGTTGGAATTTAATCGCGGCCTCG                        | Reverse primer for generating the 2200 bp non-native I-TevI target barcode assay substrate from pKox templates. |

<sup>1</sup> underlined nucleotides refer to restriction enzyme sites







**Table S.4. (Part 3 of 3) Survival Rates Determined from *in vivo* 2-Plasmid Survival Assay**

| Substrate | K26S        | K26S/T95S    | K26S/C39R/T95S |
|-----------|-------------|--------------|----------------|
| CAACG     | 73.33±22.05 | 104.00±30.64 | 116.33±43.02   |
| CTCGG     | 0.00±0.00   | 0.00±0.00    | 0.00±0.00      |
| CGTGG     | 0.00±0.00   | 0.00±0.00    | 0.00±0.00      |
| CCGGG     | 0.00±0.00   | 0.00±0.00    | 0.00±0.00      |
| CGCGG     | 0.00±0.00   | 0.00±0.00    | 0.00±0.00      |
| CGAAG     | 0.00±0.00   | 7.87±7.06    | 20.00±18.25    |
| CGCAG     | 0.00±0.00   | 0.00±0.00    | 0.00±0.00      |
| CTGGG     | 0.00±0.00   | 1.86±0.22    | 5.82±3.82      |
| CGCCG     | 0.00±0.00   | 2.50±1.83    | 12.83±10.25    |
| CGGAG     | 0.00±0.00   | 0.08±0.13    | 0.99±1.41      |
| CGGGG     | 0.00±0.00   | 0.00±0.00    | 0.00±0.00      |
| CGCTG     | 0.00±0.00   | 0.00±0.00    | 0.00±0.00      |
| CCCAG     | 0.00±0.00   | 0.00±0.00    | 0.00±0.00      |
| CCAGG     | 0.00±0.00   | 0.00±0.00    | 0.00±0.00      |
| CCCCG     | 0.00±0.00   | 4.13±0.68    | 12.67±20.21    |
| CAAGG     | 0.00±0.00   | 0.00±0.00    | 0.00±0.00      |
| CGAGG     | 0.00±0.00   | 0.00±0.00    | 0.00±0.00      |
| CACGG     | 0.00±0.00   | 0.00±0.00    | 0.00±0.00      |
| AAACG     | 0.00±0.00   | 0.00±0.00    | 0.00±0.00      |
| GAACG     | 0.00±0.00   | 0.00±0.00    | 0.00±0.00      |
| TAACG     | 0.00±0.00   | 0.00±0.00    | 0.80±0.44      |
| CAACA     | 0.00±0.00   | 0.00±0.00    | 0.00±0.00      |
| CAACC     | 0.00±0.00   | 0.00±0.00    | 0.00±0.00      |
| CAACT     | 0.00±0.00   | 0.00±0.00    | 0.00±0.00      |

## Supplementary References

1. Heddi,B., Oguey,C., Lavelle,C., Foloppe,N. and Hartmann,B. (2010) Intrinsic flexibility of B-DNA: The experimental TRX scale. *Nucleic Acids Res.*, **38**, 1034-1047.
